# Supplementary material for: Efficient and convenient synthesis of methyl (S)-5-chloro-2-hydroxy-1-oxo-2,3-dihydro-1H-indene-2-carboxylate: a key intermediate for (S)-indoxacarb using aqueous TBHP as oxidant
Source: Royal Society of Chemistry journal article supplement (doi:10.1039/d4re00510d), 2025-01-01
Supplement: d4re00510d1.pdf [file d4re00510d1.pdf]

## Supporting Information

### Efficient and Convenient Synthesis of Methyl (S)-5-Chloro-2-Hydroxy-1-Oxo-2,3-Dihydro-1H-Indene-2-Carboxylate: A Key Intermediate for (S)-Indoxacarb

#### Using Aqueous TBHP as Oxidant

Yun Zhang,<sup>†,a,b</sup> Yao Du,<sup>†,a,b</sup> Yan-Biao Chen,<sup>a,b</sup> Jia-Huan Nie,<sup>a,b</sup> Yue Xiong,<sup>a,b</sup> Bao-Dong Cui,<sup>a,b</sup> Xue-Qing Mou,<sup>a,b</sup> Ming-Qiang Zhou,<sup>\*,a,c</sup> Yong-Zheng Chen<sup>\*,a,b</sup>

<sup>a</sup> Key Laboratory of Biocatalysis & Chiral Drug Synthesis of Guizhou Province, Generic Drug Research Center of Guizhou Province, Green Pharmaceuticals Engineering Research Center of Guizhou Province, School of Pharmacy, Zunyi Medical University, Zunyi 563006, P. R. China.

<sup>b</sup> Key Laboratory of Basic Pharmacology of Ministry of Education and Joint International Research Laboratory of Ethnomedicine of Ministry of Education, Zunyi Medical University, Zunyi 563006, P. R. China.

<sup>c</sup> National Engineering Research Center of Chiral Drugs, Chengdu Institute of Organic Chemistry, Chinese Academy of Sciences, Chengdu 610041, P. R. China;

<sup>†</sup> These authors contributed equally to this work.

## Table of Contents

|                                                                                                           |            |
|-----------------------------------------------------------------------------------------------------------|------------|
| <b>1. General information .....</b>                                                                       | <b>S3</b>  |
| <b>2. Reaction optimization tables .....</b>                                                              | <b>S3</b>  |
| <b>3. Preparation of chiral ligan L1.....</b>                                                             | <b>S5</b>  |
| <b>4. General procedure for the synthesis of <math>\beta</math>-keto esters.....</b>                      | <b>S6</b>  |
| <b>5. General procedure for the enantioselective hydroxylation of <math>\beta</math>-keto ester .....</b> | <b>S12</b> |
| <b>6. Gram-scale experiment .....</b>                                                                     | <b>S18</b> |
| <b>7. The recyclability of the catalytic system .....</b>                                                 | <b>S18</b> |
| <b>8. Mechanistic studies .....</b>                                                                       | <b>S19</b> |
| <b>9. References .....</b>                                                                                | <b>S22</b> |
| <b>10. Copies of <math>^1\text{H}</math> and <math>^{13}\text{C}</math> NMR spectras.....</b>             | <b>S23</b> |
| <b>11. Copies of HPLC chromatogram .....</b>                                                              | <b>S46</b> |

## 1. General Information

TLC analysis was performed on pre-coated, glass-backed silica gel plates and visualized with UV light. Column chromatography was performed on silica gel (200-300 mesh).  $^1\text{H}$  and  $^{13}\text{C}$  NMR spectra were recorded on Agilent-400 MHz. Chemical shifts are reported in ppm versus tetramethylsilane with either tetramethylsilane or the residual solvent resonance used as an internal standard. Abbreviations were used in the description of NMR data as follows: chemical shift ( $\delta$ , ppm), multiplicity (s = singlet, d = doublet, t = triplet, dd = doublet of doublets, m = multiplet), coupling constant ( $J$ , Hz). Mass spectra were determined on an Agilent 6520 QTOF., using electron spray ionization (ESI). Melting points are performed on an SGWX-4 digital visual melting point apparatus without correction. All other commercial chemicals were used without further purification.

## 2. Reaction optimization tables

### 2.1 Optimization of the amount of $\text{Zr}(\text{acac})_4$ and **L1** (Table S1)

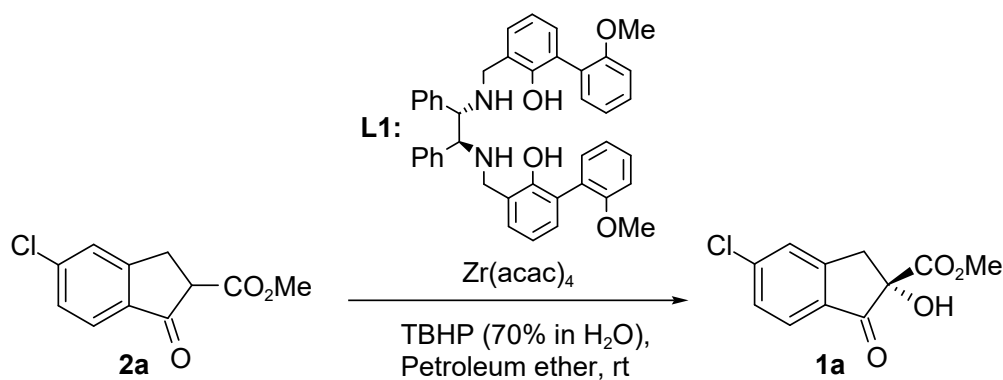

| Entry <sup>a</sup> | $\text{Zr}(\text{acac})_4$ (equiv.) | <b>L1</b> (equiv.) | Yield <sup>b</sup> | ee <sup>c</sup> |
|--------------------|-------------------------------------|--------------------|--------------------|-----------------|
| 1                  | 0.100                               | 0.110              | 88%                | 99%             |
| 2                  | 0.050                               | 0.055              | 88%                | 99%             |
| 3                  | 0.040                               | 0.044              | 89%                | 99%             |
| 4                  | 0.030                               | 0.033              | 82%                | 99%             |
| 5                  | 0.020                               | 0.022              | 32%                | 99%             |

<sup>a</sup> Reaction conditions:  $\text{Zr}(\text{acac})_4$  (x equiv.), **L1** (y equiv.), Petroleum ether (4.3 mL), 30 min. Then, **2a** (0.25 mmol, 1.0 equiv.), TBHP (70% in  $\text{H}_2\text{O}$ ) (0.375 mmol, 1.5 equiv.), 24 h. <sup>b</sup> Isolated yield and purification by filtration. <sup>c</sup> Determined by chiral HPLC.

2.2 Optimization of the amount of TBHP and the volume of petroleum ether (Table S2)

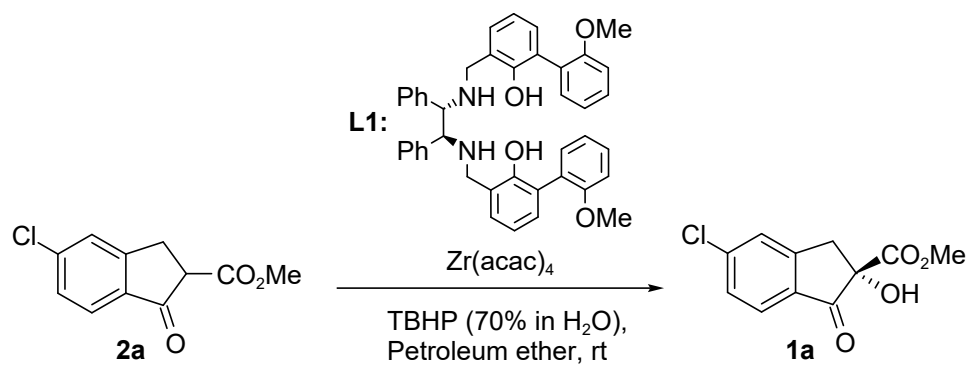

| Entry <sup>a</sup> | TBHP (70% in H <sub>2</sub> O) (equiv.) | Volume of petroleum ether | Yield <sup>b</sup> | ee <sup>c</sup> |
|--------------------|-----------------------------------------|---------------------------|--------------------|-----------------|
| 1                  | 1.5                                     | 4.3 mL                    | 89%                | 99%             |
| 2                  | 2.0                                     | 4.3 mL                    | 82%                | 99%             |
| 3                  | 1.2                                     | 4.3 mL                    | 84%                | 99%             |
| 4                  | 1.0                                     | 4.3 mL                    | 78%                | 99%             |
| 5                  | 1.5                                     | 3.5 mL                    | 92%                | 99%             |
| 6                  | 1.5                                     | 3.0 mL                    | 86%                | 99%             |

<sup>a</sup> Reaction conditions: Zr(acac)<sub>4</sub> (0.01 mmol, 0.04 equiv.), L1 (0.011 mmol, 0.044 equiv.), Petroleum ether (x mL), 30 min. Then, **2a** (0.25 mmol, 1.0 equiv.), TBHP (70% in H<sub>2</sub>O) y equiv.), 24 h. <sup>b</sup> Isolated yield and purification by filtration. <sup>c</sup> Determined by chiral HPLC.

### 3. Preparation of chiral ligan L1

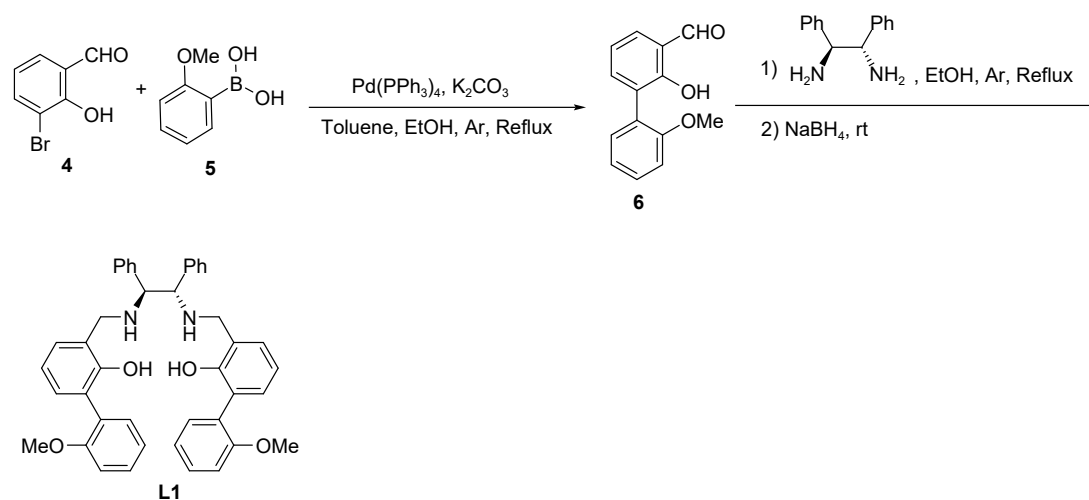

Under argon, 60 mL of toluene and 15 mL of ethanol were added to a mixture of 3-bromo-2-hydroxybenzaldehyde (2.010 g, 10 mmol), (2-methoxyphenyl) boronic acid (1.823 g, 12 mmol) and  $\text{Pd}(\text{PPh}_3)_4$  (0.254 g, 0.22 mmol), giving a yellow solution, to which solid anhydrous  $\text{K}_2\text{CO}_3$  (3.040 g, 22 mmol) was added. The reaction mixture was stirred for 4 hours under reflux and then allowed to cool to room temperature. Afterwards, the mixture was transferred to a separating funnel to which water and ethyl acetate were added. The water phase was extracted with ethyl acetate, and the organic phase was combined and dried with  $\text{Na}_2\text{SO}_4$ . Purification using column chromatography on silica gel (petroleum ether/dichloromethane = 3/1) to give the desired product **6** as a white solid (2.043 g, 89%).  $^1\text{H}$  NMR ( $\text{CDCl}_3$ , 400 MHz)  $\delta$  11.31 (s, 1H), 9.94 (s, 1H), 7.56 (t,  $J = 8.3$  Hz, 2H), 7.38 (t,  $J = 7.9$  Hz, 1H), 7.29 (d,  $J = 7.4$  Hz, 1H), 7.12 – 6.98 (m, 3H), 3.80 (s, 3H). Analytical data are in agreement with those reported in the literature<sup>[1]</sup>.

To a solution of  $(1S,2S)$ -1,2-diphenylethane-1,2-diamine (0.849 g, 4.0 mmol) in ethanol (120 mL) was added 2-hydroxy-2'-methoxy-[1,1'-biphenyl]-3-carbaldehyde **6** (1.826 g, 8.0 mmol). The reaction mixture refluxed for 14 h under argon. After cooling to 0 °C, to the above reaction mixture was added sodium borohydride (0.454 g, 12 mmol). The resulting mixture was stirred at room temperature for 5 h, and a second portion of sodium borohydride (0.227 g, 6 mmol) was added. After stirring at room temperature for 1 h, the reaction mixture was poured into water 50 mL and the ethanol

was removed in vacuo. The suspension was extracted with dichloromethane and the combined organic layers were washed with brine. The organic layer was dried over anhydrous  $\text{Na}_2\text{SO}_4$  and the solvent was concentrated under vacuum. The residue was purified by column chromatography on silica gel (petroleum ether/ethyl acetate = 5/1) to **L1** as a white solid (2.394 g, 94%).  $^1\text{H NMR}$  (400 MHz,  $\text{CDCl}_3$ )  $\delta$  7.37 – 7.33 (m, 2H), 7.31 (dd,  $J = 7.4, 1.5$  Hz, 2H), 7.24 – 7.18 (m, 6H), 7.16 (dd,  $J = 7.4, 1.7$  Hz, 2H), 7.04 (t,  $J = 7.5$  Hz, 2H), 7.00 (d,  $J = 8.3$  Hz, 2H), 6.98 – 6.93 (m, 4H), 6.86 – 6.82 (m, 2H), 6.79 (t,  $J = 7.4$  Hz, 2H), 4.01 (s, 2H), 3.86 (d,  $J = 13.5$  Hz, 2H), 3.77 (s, 6H), 3.65 (d,  $J = 13.5$  Hz, 2H). Analytical data are in agreement with those reported in the literature [2].

#### 4. General procedure for the synthesis of $\beta$ -keto esters [2,3]

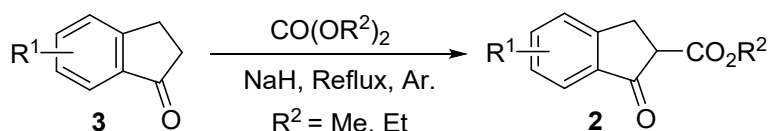

To a suspension of NaH (7.5 mmol, 60% dispersion in mineral oil) in dimethyl carbonate or diethyl carbonate (4.8 mL) was added a solution of indanone **3** (3.0 mmol) in dimethyl carbonate or diethyl carbonate (4.8 mL) dropwise at room temperature. The resulting mixture was heated to reflux until full conversion of **3** as indicated by TLC. The resulting solid was dissolved in  $\text{H}_2\text{O}$  (12 mL) and HCl (2 M, 3 mL), extracted with DCM and dried over  $\text{Na}_2\text{SO}_4$ . Purification using column chromatography on silica gel to give the desired product **2**.

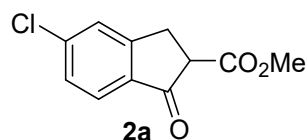

Following general procedure and **2a** was obtained as a yellow solid (579 mg, 86%) after purification by flash chromatography.  $^1\text{H NMR}$  (400 MHz,  $\text{CDCl}_3$ )  $\delta$  (duplicate signals are observed for some hydrogens; asterisks indicate those corresponding to the enol rotamer) 10.34\* (s, 1H), 7.71 (d,  $J = 8.2$  Hz, 1H), 7.56\* (d,  $J = 8.2$  Hz, 1H), 7.51

(s, 1H), 7.46\* (s, 1H), 7.39 (d,  $J = 8.2$  Hz, 1H), 3.86\* (s, 3H), 3.80 (s, 3H), 3.76 (dd,  $J = 8.3, 3.9$  Hz, 1H), 3.56 (dd,  $J = 17.6, 4.0$  Hz, 1H), 3.51\* (s, 2H), 3.36 (dd,  $J = 17.5, 8.4$  Hz, 1H).  $^{13}\text{C}$  NMR (100 MHz,  $\text{CDCl}_3$ )  $\delta$  (duplicate signals are observed for some carbons; asterisks indicate those corresponding to the enol rotamer) 198.1, 169.2, 155.1, 144.8\*, 142.2, 135.5\*, 133.7, 128.8, 127.5\*, 126.9, 125.9, 125.3\*, 121.8\*, 53.3, 53.11\*, 53.09, 51.5\*, 32.5\*, 30.0. Analytical data are in agreement with those reported in the literature [2].

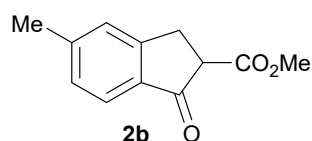

Following general procedure and **2b** was obtained as a brown liquid (490 mg, 80%) after purification by flash chromatography.  $^1\text{H}$  NMR (400 MHz,  $\text{CDCl}_3$ )  $\delta$  (duplicate signals are observed for some hydrogens; asterisks indicate those corresponding to the enol rotamer) 10.46\* (s, 1H), 7.67 (d,  $J = 7.9$  Hz, 1H), 7.54\* (d,  $J = 7.8$  Hz, 1H), 7.31 (s, 1H), 7.21 (d,  $J = 7.9$  Hz, 1H), 3.85\* (s, 3H), 3.80 (s, 3H), 3.74 (dd,  $J = 8.2, 4.0$  Hz, 1H), 3.52 (dd,  $J = 17.3, 3.7$  Hz, 1H), 3.48\* (s, 2H), 3.33 (dd,  $J = 17.2, 8.2$  Hz, 1H), 2.46 (s, 3H), 2.44\* (s, 3H).  $^{13}\text{C}$  NMR (100 MHz,  $\text{CDCl}_3$ )  $\delta$  (duplicate signals are observed for some carbons; asterisks indicate those corresponding to the enol rotamer) 199.0, 169.8, 154.3, 147.0, 133.0, 129.3\*, 129.2, 127.0\*, 126.9, 124.64, 124.60\*, 53.5, 53.4\*, 52.9, 52.8\*, 32.4\*, 30.2, 22.3, 22.2\*. Analytical data are in agreement with those reported in the literature [2].

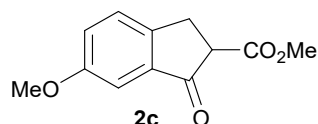

Following general procedure and **2c** was obtained as a yellow solid (362 mg, 55%) after purification by flash chromatography.  $^1\text{H}$  NMR (400 MHz,  $\text{CDCl}_3$ )  $\delta$  (duplicate signals are observed for some hydrogens; asterisks indicate those corresponding to the enol rotamer) 10.39\* (s, 1H), 7.77\* (s, 1H), 7.58 – 7.47\* (m, 1H), 7.39 (d,  $J = 7.9$  Hz,

1H), 7.25 – 7.18 (m, 2H), 7.00\* (d,  $J = 7.8$  Hz, 1H), 3.98\* (d,  $J = 26.9$  Hz, 2H), 3.85\* (s, 3H), 3.84 (s, 3H), 3.80 (s, 3H), 3.75\* (s, 3H), 3.65 (d,  $J = 16.8$  Hz, 1H), 3.47 (d,  $J = 17.4$  Hz, 1H), 3.31 (dd,  $J = 16.8, 7.6$  Hz, 1H), 3.18\* (d,  $J = 16.9$  Hz, 1H).  $^{13}\text{C}$  NMR (100 MHz,  $\text{CDCl}_3$ )  $\delta$  (duplicate signals are observed for some carbons; asterisks indicate those corresponding to the enol rotamer) 200.9\*, 199.6, 172.1\*, 169.7, 159.9\*, 159.8, 146.7, 145.3\*, 136.5, 134.8\*, 127.3, 125.8\*, 125.5\*, 125.2, 106.3\*, 105.7, 56.1\*, 55.8, 54.0, 53.6\*, 52.9, 51.4\*, 38.8\*, 29.7. Analytical data are in agreement with those reported in the literature [2].

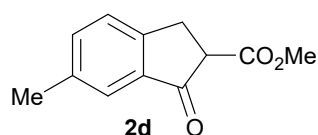

Following general procedure and **2d** was obtained as a gray solid (412 mg, 67%) after purification by flash chromatography.  $^1\text{H}$  NMR (400 MHz,  $\text{CDCl}_3$ )  $\delta$  (duplicate signals are observed for some hydrogens; asterisks indicate those corresponding to the enol rotamer) 10.38\* (s, 1H), 7.57 (s, 1H), 7.51 – 7.42 (m, 2H), 7.39\* (d,  $J = 8.0$  Hz, 1H), 7.35\* (d,  $J = 7.7$  Hz, 1H), 7.24 (d,  $J = 7.6$  Hz, 1H), 3.85 (s, 3H), 3.79\* (s, 3H), 3.74 (dd,  $J = 8.1, 3.8$  Hz, 1H), 3.51 (dd,  $J = 17.2, 3.4$  Hz, 1H), 3.46\* (s, 2H), 3.33 (dd,  $J = 17.1, 8.1$  Hz, 1H), 2.43 (s, 3H), 2.40\* (s, 3H).  $^{13}\text{C}$  NMR (100 MHz,  $\text{CDCl}_3$ )  $\delta$  (duplicate signals are observed for some carbons; asterisks indicate those corresponding to the enol rotamer) 199.7, 169.8, 151.1, 140.5\*, 138.0, 136.9, 136.8\*, 135.5, 130.6\*, 126.3, 124.7, 124.5\*, 121.2\*, 53.6, 52.9, 51.3\*, 32.2\*, 30.0, 21.5\*, 21.2. Analytical data are in agreement with those reported in the literature [2].

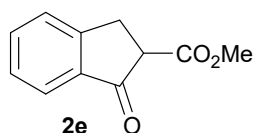

Following general procedure and **2e** was obtained as an orange liquid (437 mg, 77%) after purification by flash chromatography.  $^1\text{H}$  NMR (400 MHz,  $\text{CDCl}_3$ )  $\delta$  (duplicate signals are observed for some hydrogens; asterisks indicate those corresponding to the



enol rotamer) 10.39\* (s, 1H), 7.78 (d,  $J = 7.7$  Hz, 1H), 7.64 (t,  $J = 7.5$  Hz, 1H), 7.51 (d,  $J = 7.6$  Hz, 1H), 7.49 – 7.44\* (m, 2H), 7.40 (t,  $J = 7.3$  Hz, 1H), 3.86\* (s, 3H), 3.80 (s, 3H), 3.75 (dd,  $J = 8.0, 3.9$  Hz, 1H), 3.58 (dd,  $J = 17.2, 3.6$  Hz, 1H), 3.52\* (s, 2H), 3.39 (dd,  $J = 17.3, 8.3$  Hz, 1H).  $^{13}\text{C}$  NMR (100 MHz,  $\text{CDCl}_3$ )  $\delta$  (duplicate signals are observed for some carbons; asterisks indicate those corresponding to the enol rotamer) 199.6, 169.6, 153.7, 135.7, 135.53\*, 135.45, 135.2\*, 128.3\*, 127.5, 126.8, 126.5\*, 124.9, 124.7\*, 53.4, 53.1\*, 53.0, 52.8\*, 30.3, 30.0\*. Analytical data are in agreement with those reported in the literature [2].

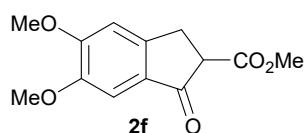

Following general procedure and **2f** was obtained as a white solid (709 mg, 94%) after purification by flash chromatography.  $^1\text{H}$  NMR (400 MHz,  $\text{CDCl}_3$ )  $\delta$  7.18 (s, 1H), 6.92 (s, 1H), 3.99 (s, 3H), 3.91 (s, 3H), 3.80 (s, 3H), 3.74 (dd,  $J = 7.8, 3.5$  Hz, 1H), 3.47 (dd,  $J = 17.0, 3.3$  Hz, 1H), 3.29 (dd,  $J = 17.1, 7.9$  Hz, 1H).  $^{13}\text{C}$  NMR (100 MHz,  $\text{CDCl}_3$ )  $\delta$  198.1, 170.0, 156.2, 149.9, 149.4, 128.0, 107.4, 104.9, 56.5, 56.3, 53.5, 52.9, 30.1. Analytical data are in agreement with those reported in the literature [2].

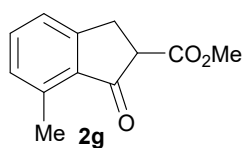

Following general procedure and **2g** was obtained as a white solid (527 mg, 86%) after purification by flash chromatography.  $^1\text{H}$  NMR (400 MHz,  $\text{CDCl}_3$ )  $\delta$  (duplicate signals are observed for some hydrogens; asterisks indicate those corresponding to the enol rotamer) 10.76\* (s, 1H), 7.45 (t,  $J = 7.5$  Hz, 1H), 7.28 (d,  $J = 7.6$  Hz, 1H), 7.11 (d,  $J = 7.4$  Hz, 1H), 3.83\* (s, 2H), 3.78 (s, 3H), 3.69 (dd,  $J = 8.4, 4.3$  Hz, 1H), 3.49 (dd,  $J = 17.2, 4.2$  Hz, 1H), 3.44\* (s, 1H), 3.30 (dd,  $J = 17.2, 8.4$  Hz, 1H), 2.63\* (s, 3H), 2.60 (s, 3H).  $^{13}\text{C}$  NMR (100 MHz,  $\text{CDCl}_3$ )  $\delta$  (duplicate signals are observed for some carbons; asterisks indicate those corresponding to the enol rotamer) 200.3, 169.9, 154.3,

143.9\*, 139.9, 134.8, 132.7, 129.7, 129.3\*, 128.9\*, 123.9, 122.3\*, 53.6, 52.77\*, 52.76, 51.2\*, 32.2\*, 29.9, 18.5\*, 18.4.

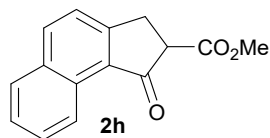

Following general procedure and **2h** was obtained as a yellow solid (539 mg, 75%) after purification by flash chromatography.  $^1\text{H}$  NMR (400 MHz,  $\text{CDCl}_3$ )  $\delta$  9.05 (d,  $J = 8.3$  Hz, 1H), 8.05 (d,  $J = 8.4$  Hz, 1H), 7.87 (d,  $J = 8.1$  Hz, 1H), 7.66 (t,  $J = 7.6$  Hz, 1H), 7.56 (d,  $J = 7.5$  Hz, 1H), 7.51 (d,  $J = 8.5$  Hz, 1H), 3.87 – 3.82 (m, 1H), 3.81 (s, 3H), 3.63 (dd,  $J = 17.5, 2.4$  Hz, 1H), 3.42 (dd,  $J = 17.6, 7.8$  Hz, 1H).  $^{13}\text{C}$  NMR (100 MHz,  $\text{CDCl}_3$ )  $\delta$  199.8, 169.9, 157.4, 136.8, 132.9, 129.6, 129.4, 129.3, 128.4, 127.0, 124.0, 123.7, 53.7, 52.9, 30.7.

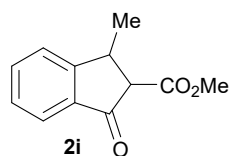

Following general procedure and **2i** was obtained as a brown liquid (346 mg, 56%) after purification by flash chromatography.  $^1\text{H}$  NMR (400 MHz,  $\text{CDCl}_3$ )  $\delta$  (duplicate signals are observed for some hydrogens; asterisks indicate those corresponding to the enol rotamer) 10.55\* (s, 1H), 7.76 (d,  $J = 7.7$  Hz, 1H), 7.70 – 7.64 (m, 1H), 7.64 – 7.60\* (m, 1H), 7.53 (d,  $J = 7.7$  Hz, 1H), 7.48 – 7.45\* (m, 1H), 7.42 (t,  $J = 7.4$  Hz, 1H), 3.88\* (s, 3H), 3.87 – 3.82 (m, 1H), 3.81 (s, 3H), 3.73\* (s, 1H), 3.67\* (dd,  $J = 14.5, 7.3$  Hz, 1H), 3.32 (d,  $J = 4.5$  Hz, 1H), 1.50 (d,  $J = 7.1$  Hz, 3H), 1.42\* (d,  $J = 7.3$  Hz, 3H).  $^{13}\text{C}$  NMR (100 MHz,  $\text{CDCl}_3$ )  $\delta$  (duplicate signals are observed for some carbons; asterisks indicate those corresponding to the enol rotamer) 199.0, 169.6, 158.1, 135.7, 135.6\*, 134.8, 129.8\*, 128.1, 127.1\*, 125.2, 124.5, 123.6\*, 120.9\*, 62.1, 58.1\*, 52.8, 51.3\*, 39.3\*, 37.7, 20.1, 17.1\*.

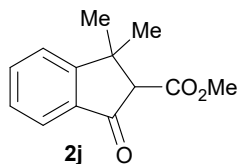

Following general procedure and **2j** was obtained as a brown liquid (519 mg, 79%) after purification by flash chromatography.  $^1\text{H}$  NMR (400 MHz,  $\text{CDCl}_3$ )  $\delta$  (duplicate signals are observed for some hydrogens; asterisks indicate those corresponding to the enol rotamer) 10.70\* (s, 1H), 7.76 (d,  $J = 7.7$  Hz, 1H), 7.68 – 7.63 (m, 1H), 7.61\* (d,  $J = 7.6$  Hz, 1H), 7.50 (d,  $J = 7.8$  Hz, 1H), 7.47 – 7.42\* (m, 2H), 7.40 (d,  $J = 7.4$  Hz, 1H), 7.35\* (td,  $J = 7.4, 1.0$  Hz, 1H), 3.89\* (s, 3H), 3.75 (s, 3H), 3.50 (s, 1H), 1.57 (s, 3H), 1.43\* (s, 6H), 1.36 (s, 3H).  $^{13}\text{C}$  NMR (100 MHz,  $\text{CDCl}_3$ )  $\delta$  (duplicate signals are observed for some carbons; asterisks indicate those corresponding to the enol rotamer) 199.9, 169.7, 162.3, 155.2\*, 135.8, 134.3, 134.2\*, 130.2\*, 128.1, 127.0\*, 124.3, 123.5, 121.9\*, 121.1\*, 111.7\*, 65.4, 52.2, 51.3\*, 45.2\*, 42.8, 30.6, 26.3\*, 24.7.

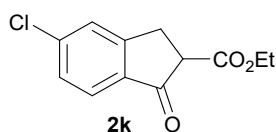

Following general procedure and **2k** was obtained as a brown liquid (473 mg, 66%) after purification by flash chromatography.  $^1\text{H}$  NMR (400 MHz,  $\text{CDCl}_3$ )  $\delta$  (duplicate signals are observed for some hydrogens; asterisks indicate those corresponding to the enol rotamer) 10.43\* (s, 1H), 7.71 (d,  $J = 8.2$  Hz, 1H), 7.56\* (d,  $J = 8.0$  Hz, 1H), 7.51 (s, 1H), 7.46\* (s, 1H), 7.38 (d,  $J = 7.9$  Hz, 1H), 7.36\* (s, 1H), 4.33\* (q,  $J = 6.7$  Hz, 2H), 4.25 (q,  $J = 6.9$  Hz, 2H), 3.74 (dd,  $J = 8.0, 3.2$  Hz, 1H), 3.55 (dd,  $J = 17.3, 3.9$  Hz, 1H), 3.51\* (s, 1H), 3.36 (dd,  $J = 17.4, 8.2$  Hz, 1H), 1.37\* (t,  $J = 7.2$  Hz, 1H), 1.32 (t,  $J = 7.0$  Hz, 3H).  $^{13}\text{C}$  NMR (100 MHz,  $\text{CDCl}_3$ )  $\delta$  (duplicate signals are observed for some carbons; asterisks indicate those corresponding to the enol rotamer) 198.2, 168.8, 155.2, 144.8\*, 142.2, 135.6\*, 133.8, 128.8, 127.5\*, 126.9, 125.9, 125.3\*, 121.7\*, 62.1, 60.4\*, 53.5, 32.6\*, 30.1, 29.8\*, 14.6\*, 14.3.

## 5. General procedure for the enantioselective hydroxylation of $\beta$ -keto ester

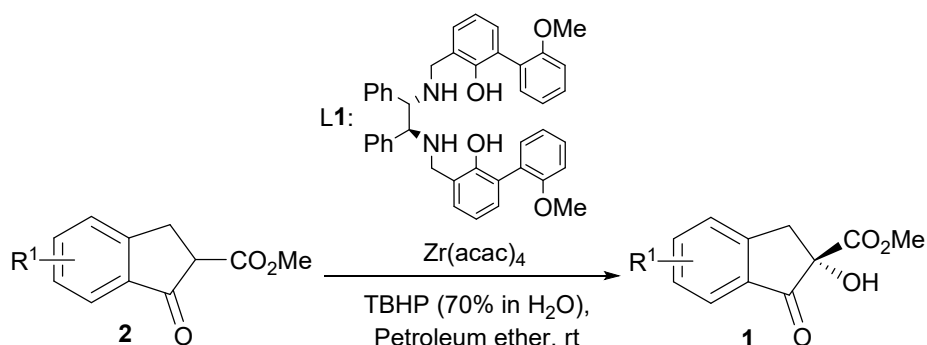

### General procedure A:

To a solution of **L1** (0.014 g, 0.022 mmol) in petroleum ether (7.00 mL) was added  $Zr(acac)_4$  (0.010 g, 0.020 mmol). The mixture was stirred at room temperature for 30 min. Then,  $\beta$ -keto ester **2** (0.50 mmol) and TBHP (70% in  $H_2O$ , 0.096 mL, 0.75 mmol) were added sequentially. The resulting solution was stirred at room temperature for 24 hours. The precipitates were formed during the course of the reaction, which was filtered and washed thoroughly with cold petroleum ether to give the desired product **1**.

### General procedure B:

To a solution of **L1** (0.014 g, 0.022 mmol) in petroleum ether (7.00 mL) was added  $Zr(acac)_4$  (0.010 g, 0.020 mmol). The mixture was stirred at room temperature for 30 min. Then,  $\beta$ -keto ester **2** (0.50 mmol) and TBHP (70% in  $H_2O$ , 0.096 mL, 0.75 mmol) were added sequentially, and the resulting solution was stirred at room temperature. After 24 hours, additional TBHP (70% in  $H_2O$ , 0.048 mL, 0.375 mmol) was added once every 8 hours for a total of 3 times. The precipitates were formed during the course of the reaction, which was filtered and washed thoroughly with cold petroleum ether to give the desired product **1**.

### General procedure C:

To a solution of **L1** (0.014 g, 0.022 mmol) in petroleum ether (7.00 mL) was added  $Zr(acac)_4$  (0.010 g, 0.020 mmol). The mixture was stirred at room temperature for 30

min. Then,  $\beta$ -keto ester **2** (0.50 mmol) and TBHP (70% in H<sub>2</sub>O, 0.096 mL, 0.75 mmol) were added sequentially, and the resulting solution was stirred at room temperature. After 24 hours, additional TBHP (70% in H<sub>2</sub>O, 0.048 mL, 0.375 mmol) was added once every 8 hours for a total of 3 times. The mixture was concentrated under vacuum. The residue was purified by column chromatography to give the desired product **1**.

#### General procedure D:

To a solution of **L1** (0.014 g, 0.022 mmol) in petroleum ether (7.00 mL) was added Zr(acac)<sub>4</sub> (0.010 g, 0.020 mmol). The mixture was stirred at room temperature for 30 min. Then,  $\beta$ -keto ester **2** (0.50 mmol) and TBHP (70% in H<sub>2</sub>O, 0.096 mL, 0.75 mmol) were added sequentially. The resulting solution was stirred at room temperature for 24 hours. The mixture was concentrated under vacuum. The residue was purified by column chromatography to give the desired product **1**.

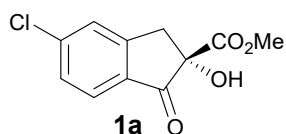

Following general procedure A and **1a** was obtained as a solid (111 mg, yield 92%, ee 99%) after purification by filtration. <sup>1</sup>H NMR (CDCl<sub>3</sub>, 400 MHz):  $\delta$  = 7.74 (d, J = 8.2 Hz, 1H), 7.50 (s, 1H), 7.42 (d, J = 8.2 Hz, 1H), 4.00 (s, 1H), 3.75 (s, 3H), 3.70 (d, J = 17.5 Hz, 1H), 3.24 (d, J = 17.5 Hz, 1H). <sup>13</sup>C NMR(CDCl<sub>3</sub>, 100 MHz):  $\delta$  = 199.6, 171.7, 153.7, 143.0, 132.0, 129.2, 126.9, 126.5, 80.5, 53.8, 39.0. HRMS (ESI): m/z [M+Na]<sup>+</sup> calcd for C<sub>11</sub>H<sub>9</sub>ClNaO<sub>4</sub>: 263.0082; found: 263.0078. HPLC analysis CHIRALPAK OD-H, Hexane: *i*-PrOH=9:1, 25 °C, 1.0 mL/min flow rate, detection at 254 nm, t<sub>1</sub>=13.99 min (major), t<sub>2</sub>=17.75 min (minor). Analytical data are in agreement with those reported in the literature [2,3].

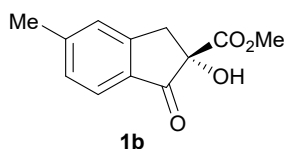

Following general procedure A and **1b** was obtained as a solid (109 mg, yield 99%, ee 97%) after purification by filtration.  $^1\text{H}$  NMR (400 MHz,  $\text{CDCl}_3$ )  $\delta$  7.70 (d,  $J = 7.9$  Hz, 1H), 7.30 (s, 1H), 7.24 (brs, 1H), 3.94 (s, 1H), 3.74 (s, 3H), 3.68 (d,  $J = 17.2$  Hz, 1H), 3.21 (d,  $J = 17.2$  Hz, 1H), 2.47 (s, 3H).  $^{13}\text{C}$  NMR (100 MHz, DMSO)  $\delta$  200.7, 172.0, 152.6, 147.3, 131.2, 129.4, 127.2, 124.4, 80.0, 52.4, 40.7, 21.8. HRMS (ESI): calcd for  $\text{C}_{12}\text{H}_{13}\text{O}_4$   $[\text{M}+\text{H}]^+$ : 221.0808, found: 221.0805. HPLC analysis CHIRALPAK OD-H, Hexane: *i*-PrOH=47:3, 25 °C, 0.8 mL/min flow rate, detection at 254 nm,  $t_1=20.20$  min (major),  $t_2=24.92$  min (minor). Analytical data are in agreement with those reported in the literature [2].

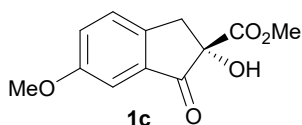

Following general procedure A and **1c** was obtained as a solid (106 mg, yield 90%, ee 94%) after purification by filtration.  $^1\text{H}$  NMR (400 MHz,  $\text{CDCl}_3$ )  $\delta$  7.39 (d,  $J = 8.5$  Hz, 1H), 7.28 (s, 1H), 7.22 (s, 1H), 4.11 (s, 1H), 3.85 (s, 3H), 3.74 (s, 3H), 3.66 (d,  $J = 17.1$  Hz, 1H), 3.18 (d,  $J = 16.8$  Hz, 1H).  $^{13}\text{C}$  NMR (100 MHz,  $\text{CDCl}_3$ )  $\delta$  201.0, 172.1, 159.9, 145.3, 134.8, 127.3, 125.8, 106.3, 81.2, 55.8, 53.6, 38.8. HRMS (ESI): calcd for  $\text{C}_{12}\text{H}_{13}\text{O}_5$   $[\text{M}+\text{H}]^+$ : 237.0757, found: 237.0767. HPLC analysis CHIRALPAK OD-H, Hexane: *i*-PrOH=9:1, 25 °C, 1.0 mL/min flow rate, detection at 254 nm,  $t_1=13.95$  min (major),  $t_2=15.94$  min (minor). Analytical data are in agreement with those reported in the literature [2].

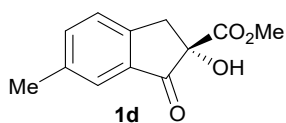

Following general procedure B and **1d** was obtained as a solid (90 mg, yield 81%, ee 95%) after purification by filtration.  $^1\text{H}$  NMR (400 MHz,  $\text{CDCl}_3$ )  $\delta$  7.60 (s, 1H), 7.50 (d,  $J = 7.8$  Hz, 1H), 7.39 (d,  $J = 7.8$  Hz, 1H), 4.03 (s, 1H), 3.74 (s, 3H), 3.69 (d,  $J = 17.2$  Hz, 1H), 3.21 (d,  $J = 17.2$  Hz, 1H), 2.42 (s, 3H).  $^{13}\text{C}$  NMR (100 MHz,  $\text{CDCl}_3$ )  $\delta$  201.0, 172.2, 149.8, 138.4, 137.6, 133.8, 126.3, 125.3, 80.8, 53.6, 39.1, 21.2. HRMS (ESI): calcd for  $\text{C}_{12}\text{H}_{12}\text{NaO}_4$   $[\text{M}+\text{Na}]^+$ : 243.0628, found: 243.0636. HPLC analysis CHIRALPAK OD-H, Hexane: *i*-PrOH=47:3, 25 °C, 0.8 mL/min flow rate, detection at 254 nm,  $t_1$ =18.07 min (major),  $t_2$ =21.32 min (minor). Analytical data are in agreement with those reported in the literature [2].

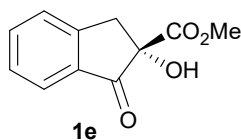

Following general procedure B and **1e** was obtained as a solid (87 mg, yield 85%, ee 90%) after purification by filtration.  $^1\text{H}$  NMR (400 MHz,  $\text{CDCl}_3$ )  $\delta$  7.81 (d,  $J = 7.7$  Hz, 1H), 7.68 (t,  $J = 7.5$  Hz, 1H), 7.50 (d,  $J = 7.6$  Hz, 1H), 7.44 (t,  $J = 7.5$  Hz, 1H), 4.07 (s, 1H), 3.82 – 3.66 (m, 4H), 3.27 (d,  $J = 17.4$  Hz, 1H).  $^{13}\text{C}$  NMR (100 MHz,  $\text{CDCl}_3$ )  $\delta$  201.5, 171.9, 152.2, 136.3, 133.5, 128.3, 127.1, 124.5, 79.7, 52.5, 40.9. HRMS (ESI): calcd for  $\text{C}_{11}\text{H}_{11}\text{O}_4$   $[\text{M}+\text{H}]^+$ : 207.0652, found: 207.0655. HPLC analysis CHIRALPAK AD-H, Hexane: *i*-PrOH=22:3, 25 °C, 1.0 mL/min flow rate, detection at 254 nm,  $t_1$ =18.07 min (major),  $t_2$ =19.53 min (minor). Analytical data are in agreement with those reported in the literature [2].

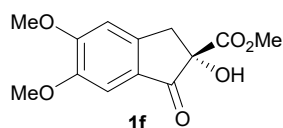

Following general procedure C and **1f** was obtained as a solid (60 mg, yield 45%, ee 97%) after purification by column chromatography.  $^1\text{H}$  NMR (400 MHz,  $\text{CDCl}_3$ )  $\delta$  7.20 (s, 1H), 6.91 (s, 1H), 4.00 (s, 3H), 3.96 (d,  $J = 11.0$  Hz, 1H), 3.92 (s, 3H), 3.75 (s, 3H), 3.65 (d,  $J = 17.0$  Hz, 1H), 3.17 (d,  $J = 17.0$  Hz, 1H).  $^{13}\text{C}$  NMR (100 MHz,  $\text{CDCl}_3$ )  $\delta$

199.3, 172.3, 156.8, 150.0, 148.3, 126.2, 107.4, 105.3, 80.8, 56.5, 56.2, 53.5, 39.1. HRMS (ESI): calcd for C<sub>13</sub>H<sub>15</sub>O<sub>6</sub> [M+H]<sup>+</sup>: 267.0863, found: 267.0860. HPLC analysis CHIRALPAK AD-H, Hexane: *i*-PrOH=3:1, 25 °C, 1.0 mL/min flow rate, detection at 254 nm, t<sub>1</sub>=19.22 min (major), t<sub>2</sub>=23.06 min (minor). Analytical data are in agreement with those reported in the literature [2].

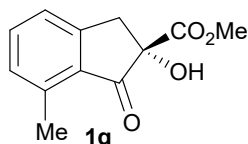

Following general procedure C and **1g** was obtained as a solid (69 mg, yield 62%, ee 53%) after purification by column chromatography. <sup>1</sup>H NMR (400 MHz, CDCl<sub>3</sub>) δ 7.51 (dd, *J* = 13.4, 5.9 Hz, 1H), 7.30 (d, *J* = 7.6 Hz, 1H), 7.18 (d, *J* = 7.4 Hz, 1H), 4.03 (s, 1H), 3.74 (s, 3H), 3.70 (d, *J* = 17.3 Hz, 1H), 3.20 (d, *J* = 17.3 Hz, 1H), 2.63 (s, 3H). <sup>13</sup>C NMR (100 MHz, CDCl<sub>3</sub>) δ 201.6, 172.2, 152.9, 140.6, 135.6, 131.2, 130.0, 123.8, 80.5, 53.6, 38.8, 18.5. HRMS (ESI): calcd for C<sub>12</sub>H<sub>13</sub>O<sub>4</sub> [M+H]<sup>+</sup>: 221.0808, found: 221.0804. HPLC analysis CHIRALPAK OD-H, Hexane: *i*-PrOH=9:1, 25 °C, 1.0 mL/min flow rate, detection at 254 nm, t<sub>1</sub>=9.22 min (major), t<sub>2</sub>=11.40 min (minor).

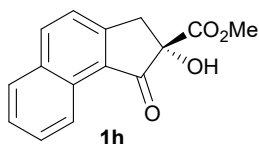

Following general procedure C and **1h** was obtained as a solid (39 mg, yield 30%, ee 30%) after purification by column chromatography. <sup>1</sup>H NMR (400 MHz, CDCl<sub>3</sub>) δ 9.00 (d, *J* = 8.3 Hz, 1H), 8.14 (d, *J* = 8.4 Hz, 1H), 7.93 (d, *J* = 8.1 Hz, 1H), 7.71 (t, *J* = 7.6 Hz, 1H), 7.60 (t, *J* = 7.6 Hz, 1H), 7.55 (d, *J* = 8.3 Hz, 1H), 4.12 (s, 1H), 3.84 (d, *J* = 14.7 Hz, 1H), 3.74 (s, 3H), 3.37 (d, *J* = 17.6 Hz, 1H). <sup>13</sup>C NMR (100 MHz, CDCl<sub>3</sub>) δ 201.1, 172.2, 156.1, 137.6, 133.1, 129.8, 129.7, 128.6, 127.9, 127.3, 124.2, 123.7, 80.7, 53.6, 39.6. HRMS (ESI): calcd for C<sub>15</sub>H<sub>13</sub>O<sub>4</sub> [M+H]<sup>+</sup>: 257.0808, found: 257.0808.



HPLC analysis CHIRALPAK OD-H, Hexane: *i*-PrOH=9:1, 25 °C, 1.0 mL/min flow rate, detection at 254 nm, t<sub>1</sub>=16.85 min (major), t<sub>2</sub>=19.27 min (minor).

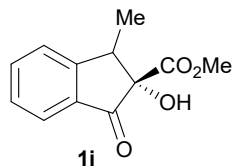

Following general procedure C and **1i** was obtained as a solid (47 mg, yield 42%, ee 63%) after purification by column chromatography. <sup>1</sup>H NMR (400 MHz, CDCl<sub>3</sub>) δ 7.80 (d, *J* = 7.7 Hz, 1H), 7.70 (td, *J* = 7.7, 1.1 Hz, 1H), 7.53 (dd, *J* = 7.8, 0.7 Hz, 1H), 7.44 (t, *J* = 7.5 Hz, 1H), 3.92 (s, 1H), 3.80 (q, *J* = 7.3 Hz, 1H), 3.73 (s, 3H), 1.34 (d, *J* = 7.3 Hz, 3H). <sup>13</sup>C NMR (100 MHz, CDCl<sub>3</sub>) δ 201.1, 172.5, 158.6, 136.4, 132.8, 128.3, 125.6, 125.2, 82.1, 53.7, 42.6, 16.2. HRMS (ESI): calcd for C<sub>12</sub>H<sub>13</sub>O<sub>4</sub> [M+H]<sup>+</sup>: 221.0808, found: 221.0807. HPLC analysis CHIRALPAK OD-H, Hexane: *i*-PrOH=22:3, 25 °C, 1.0 mL/min flow rate, detection at 254 nm, t<sub>1</sub>=7.64 min (major), t<sub>2</sub>=8.74 min (minor).

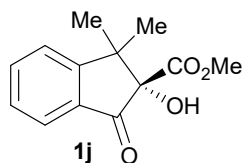

Following general procedure B and **1j** was obtained as a solid (63 mg, yield 53%, ee 2%) after purification by filtration. <sup>1</sup>H NMR (400 MHz, CDCl<sub>3</sub>) δ 7.76 (d, *J* = 7.4 Hz, 1H), 7.67 (t, *J* = 7.2 Hz, 1H), 7.47 (d, *J* = 7.5 Hz, 1H), 7.41 (t, *J* = 7.4 Hz, 1H), 3.95 (s, 1H), 3.61 (s, 3H), 1.39 (s, 3H), 1.23 (s, 3H). <sup>13</sup>C NMR (100 MHz, CDCl<sub>3</sub>) δ 200.7, 172.0, 160.9, 136.1, 133.1, 128.0, 124.6, 123.3, 87.7, 53.3, 46.8, 29.9, 21.4. HRMS (ESI): calcd for C<sub>13</sub>H<sub>15</sub>O<sub>4</sub> [M+H]<sup>+</sup>: 235.0965, found: 235.0961. HPLC analysis CHIRALPAK OD-H, Hexane: *i*-PrOH=23:2, 25 °C, 0.8 mL/min flow rate, detection at 254 nm, t<sub>1</sub>=11.52 min (major), t<sub>2</sub>=12.60 min (minor).

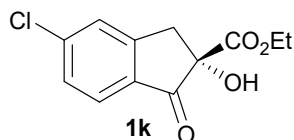

Following general procedure D and **1k** was obtained as a solid (44 mg, yield 35%, ee 83%) after purification by column chromatography.  $^1\text{H}$  NMR (400 MHz,  $\text{CDCl}_3$ )  $\delta$  7.74 (d,  $J = 8.0$  Hz, 1H), 7.50 (s, 1H), 7.42 (d,  $J = 8.2$  Hz, 1H), 4.22 (q,  $J = 6.2$ , 2H), 4.03 (s, 1H), 3.70 (d,  $J = 17.8$  Hz, 1H), 3.23 (d,  $J = 17.7$  Hz, 1H), 1.20 (t,  $J = 7.1$  Hz, 3H).  $^{13}\text{C}$  NMR (100 MHz,  $\text{CDCl}_3$ )  $\delta$  199.7, 171.2, 153.8, 142.9, 132.1, 129.1, 126.8, 126.5, 80.4, 63.1, 39.1, 14.1. HRMS (ESI): calcd for  $\text{C}_{12}\text{H}_{11}\text{ClNaO}_4$   $[\text{M}+\text{Na}]^+$ : 277.0238, found: 277.0254. HPLC analysis CHIRALPAK OD-H, Hexane: *i*-PrOH=9:1, 25 °C, 1.0 mL/min flow rate, detection at 254 nm,  $t_1=10.29$  min (major),  $t_2=12.49$  min (minor). Analytical data are in agreement with those reported in the literature [3].

## 6. Gram-scale experiment

To a solution of **L1** (0.841 g, 1.32 mmol) in petroleum ether (420.00 mL) was added  $\text{Zr}(\text{acac})_4$  (0.585 g, 1.20 mmol). The mixture was stirred at room temperature for 30 min. Then, methyl 5-chloro-1-oxo-2,3-dihydro-1*H*-indene-2-carboxylate **2a** (6.739 g, 30.0 mmol) and TBHP (70% in  $\text{H}_2\text{O}$ , 5.79 mL, 45 mmol) were added sequentially. The resulting solution was stirred at room temperature for 36 hours. Fine white precipitates were formed during the course of the reaction. The white solid product **1a** was isolated by filtration and washed thoroughly with cold petroleum ether: the amount of the obtained product **1a** was 7.053 g (yield 98%, ee 91%).

## 7. The recyclability of the catalytic system

To a solution of **L1** (0.140 g, 0.22 mmol) in petroleum ether (70.0 mL) was added  $\text{Zr}(\text{acac})_4$  (0.098 g, 0.20 mmol). The mixture was stirred at room temperature for 30 min. Then, methyl 5-chloro-1-oxo-2,3-dihydro-1*H*-indene-2-carboxylate **2a** (1.123 g, 5.0 mmol) and TBHP (70% in  $\text{H}_2\text{O}$ , 7.5 mmol) were added sequentially. The resulting solution was stirred at room temperature for 24 hours. Fine white precipitates were

formed during the course of the reaction. The white solid was isolated by filtration. Firstly, the filtrate solution containing the catalyst was decanted into another flask and fresh portions of ester **2a** and TBHP (70% in H<sub>2</sub>O) were added to initiate the reaction, and the reaction was reperformed over 3 cycles. Then, the solid was washed thoroughly with cold petroleum ether to give the product **1a**.

First cycle: the amount of the obtained product **1a** was 1.095 g (yield 91%, ee 99%)

Second cycle: the amount of the obtained product **1a** was 0.902 g (yield 75%, ee 63%)

Third cycle: the amount of the obtained product **1a** was 0.517 g (yield 43%, ee 16%)

## 8. Mechanistic studies

### 8.1 HRMS Study

To a solution of **L1** (7.0 mg, 0.011 mmol) in petroleum ether (3.5 mL) was added Zr(acac)<sub>4</sub> (5.0 mg, 0.010 mmol). The mixture was stirred at room temperature for 30 min. Then, a small amount of the mixture was taken in dichloromethane for high resolution mass spectrometry. The HRMS of the in situ generated Zr(IV)-**L1** complex exhibits a ion peak at m/z 824.2404, whose mass correspond to [Zr<sup>IV</sup>(**L1**)(acac)]<sup>+</sup> (calculated m/z = 824.2397) (Figure S1)

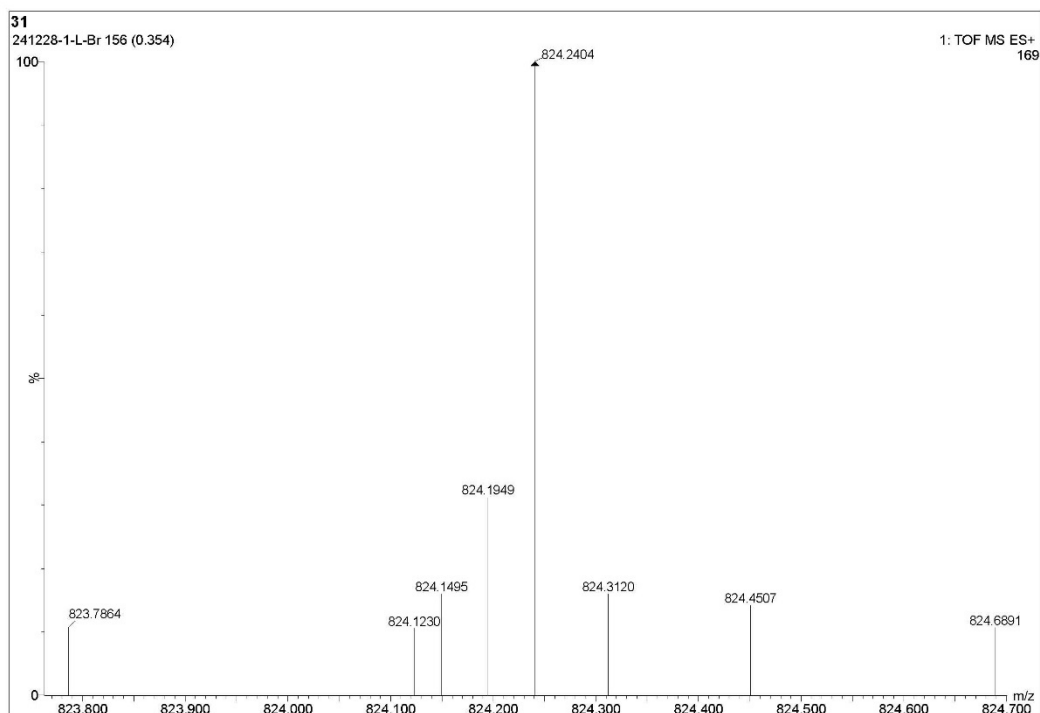

Figure S1 HRMS spectrum of Zr(IV)-**L1** generated in situ in the reaction of Zr(acac)<sub>4</sub> and **L1** in petroleum ether at room temperature.

## 8.2 NMR Study

A NMR tube was charged with **L1** (2.0 mg, 0.0031 mmol), Zr(acac)<sub>4</sub> (1.4 mg, 0.028 mmol) and cyclohexane-d<sub>12</sub> (1.0 mL) and the resulting solution was stirred at room temperature. After 30 min, the mixture was determined by <sup>1</sup>H NMR analysis. The full <sup>1</sup>H NMR spectra were given in Figure S2, compared with the <sup>1</sup>H NMR spectra of Zr(acac)<sub>4</sub>, acetylacetonate and **L1**, significant chemical shift changes were observed at δ 5.48-5.06 ppm and 2.00-1.35 ppm. The spectra from δ 5.48 ppm to 5.06 ppm were enlarged in Figure S3. From Figure S3, the α-H (-CH-) of acac<sup>-</sup> in Zr(acac)<sub>4</sub> (δ 5.33 ppm) disappeared and the α-H (-CH-) of acac<sup>-</sup> in Zr(IV)-**L1** complex (δ 5.32 ppm) appeared. Furthermore, Figure S4 showed that the CH<sub>3</sub> of acac<sup>-</sup> in Zr(acac)<sub>4</sub> (δ 1.80 ppm) disappeared and the CH<sub>3</sub> of acac<sup>-</sup> in Zr(IV)-**L1** complex (δ 1.45 ppm) appeared.

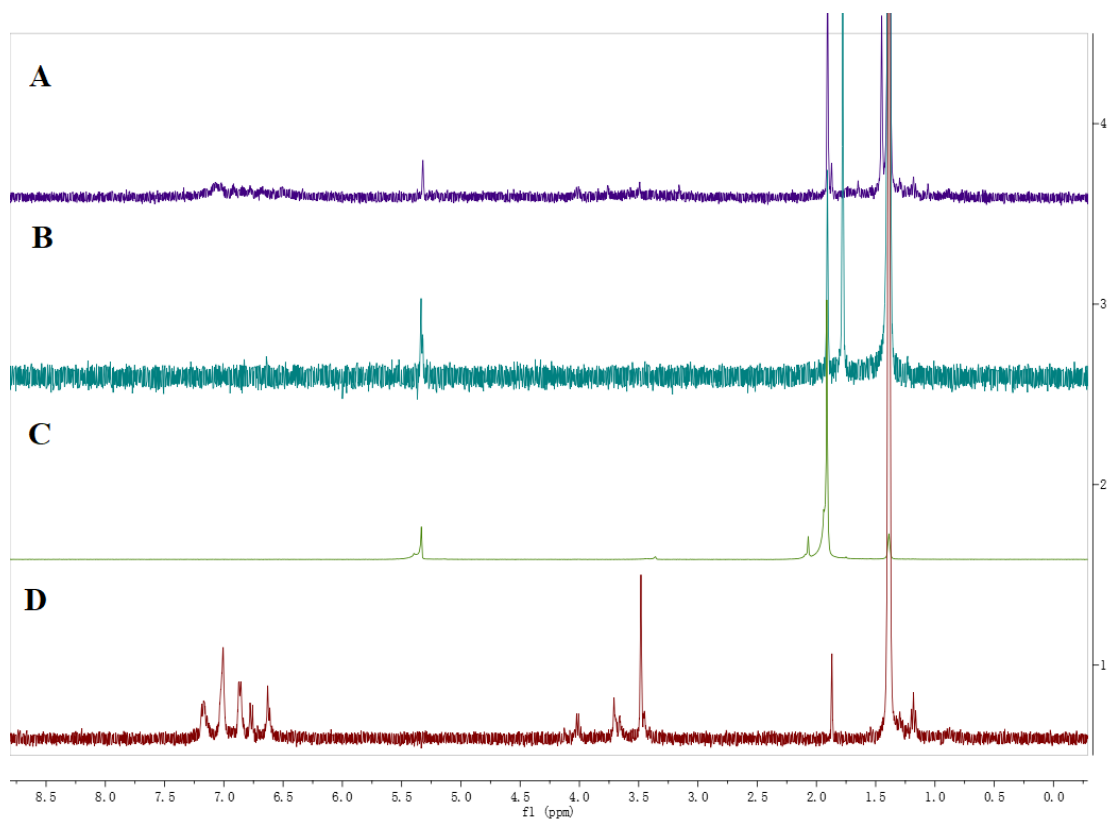

Figure S2 The formation of Zr(IV)-L1 complex evidenced by  $^1\text{H}$  NMR analysis. (A) the resulting solution of the reaction between L1 and  $\text{Zr}(\text{acac})_4$ ; (B)  $\text{Zr}(\text{acac})_4$ ; (C) acetylacetonone (Hacac); (D) L1.

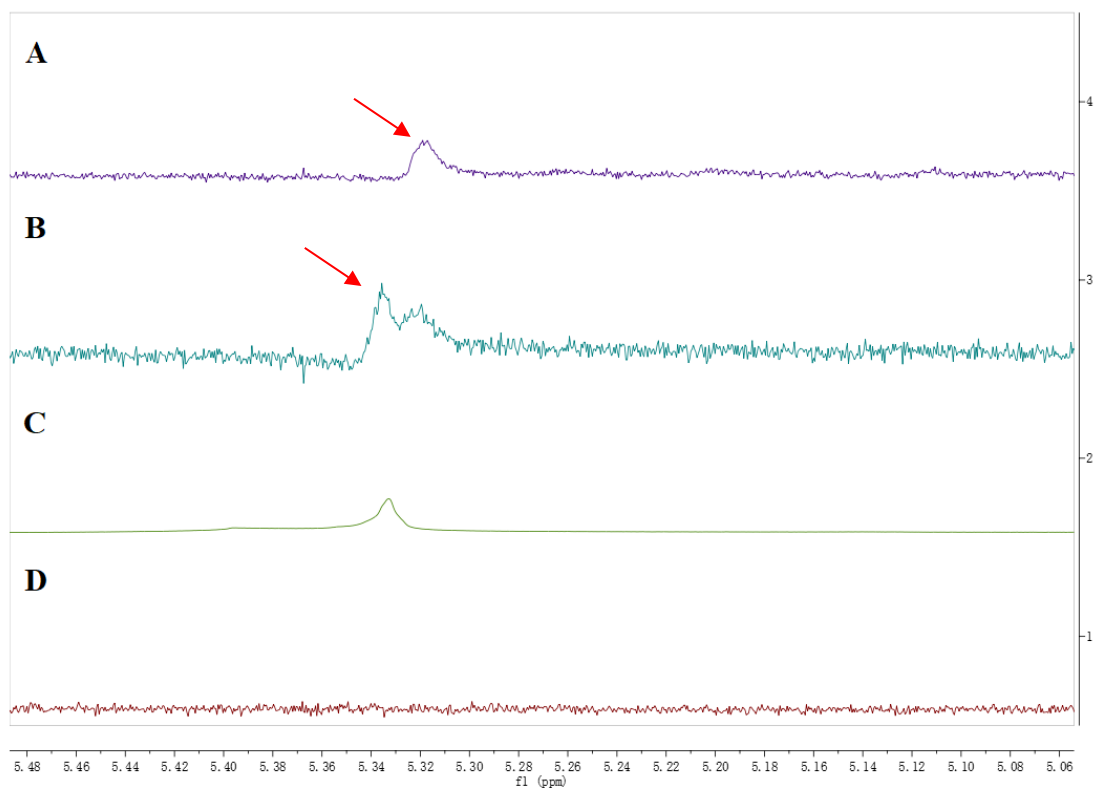

Figure S3 The enlarged spectra of Figure S2 scaled from  $\delta$  5.48 to 5.06 ppm. (A) the resulting solution of the reaction between L1 and Zr(acac)<sub>4</sub>; (B) Zr(acac)<sub>4</sub>; (C) acetylacetone (Hacac); (D) L1.

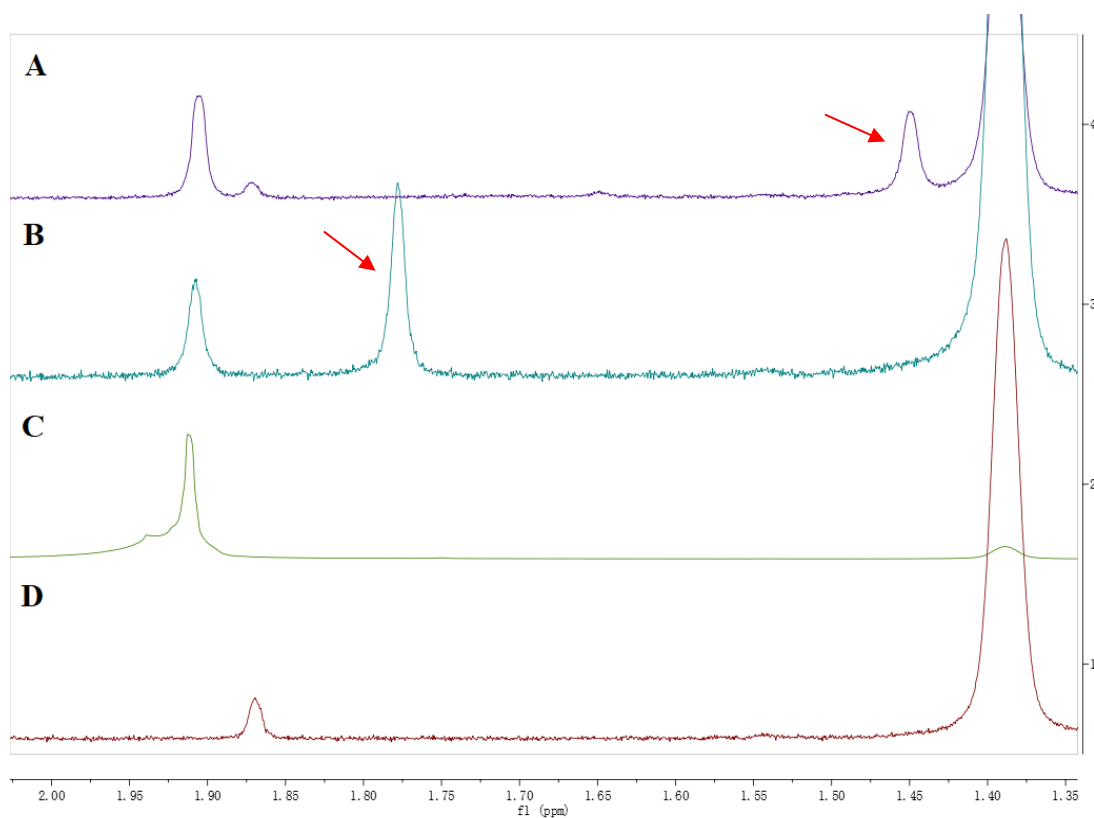

Figure S4 The enlarged spectra of Figure S2 scaled from  $\delta$  2.00 to 1.35 ppm. (A) the resulting solution of the reaction between L1 and Zr(acac)<sub>4</sub>; (B) Zr(acac)<sub>4</sub>; (C) acetylacetone (Hacac); (D) L1.

## 9. References

- [1] H.-L. Mu, W.-P. Ye, D.-P. Song, Y.-S. Li, *Organometallics*, 2010, **29**, 6282.
- [2] J. Chen, H.-Y. Gu, X.-Y. Zhu, W.-W. Nam and B. Wang, *Adv. Synth. Catal.*, 2020, **362**, 2976.
- [3] F. Yang, J. Zhao, X. Tang, G. Zhou, W. Song, Q. Meng, *Org. Lett.*, 2017, **19**, 448.

## 10. Copies of $^1\text{H}$ and $^{13}\text{C}$ NMR spectra

### 10.1 chiral ligand L1

#### $^1\text{H}$ NMR of compound 6

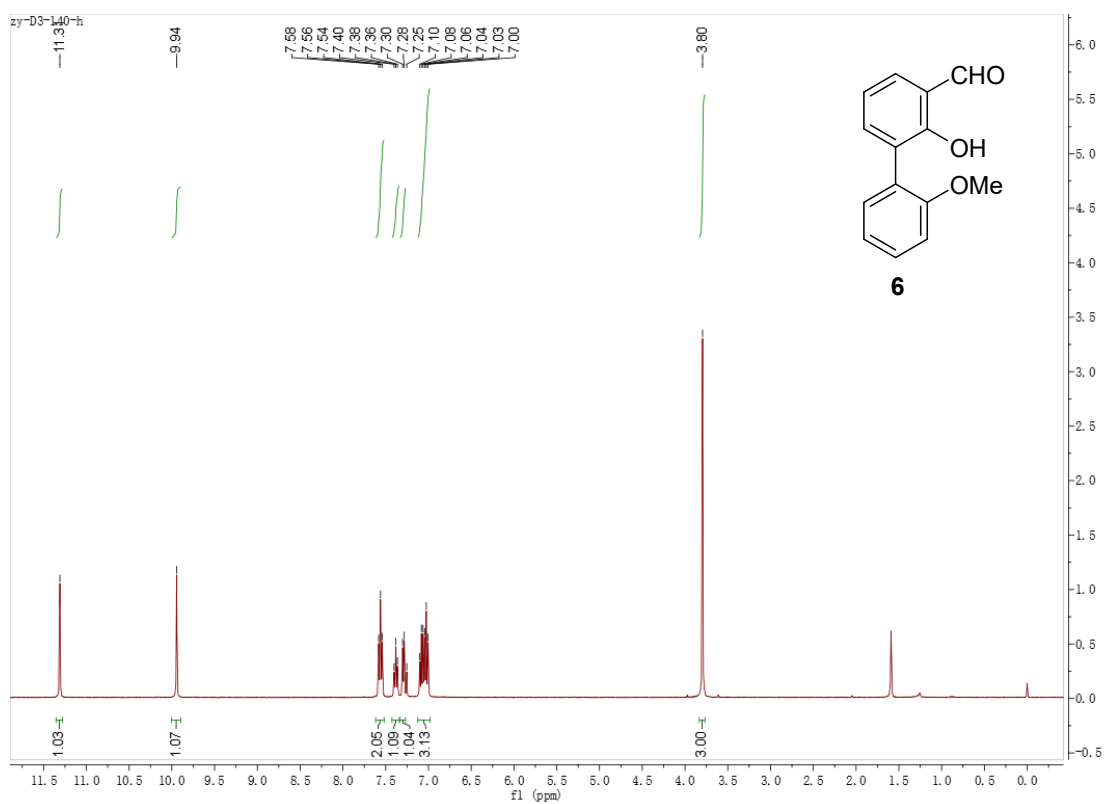

#### $^1\text{H}$ NMR of compound L1

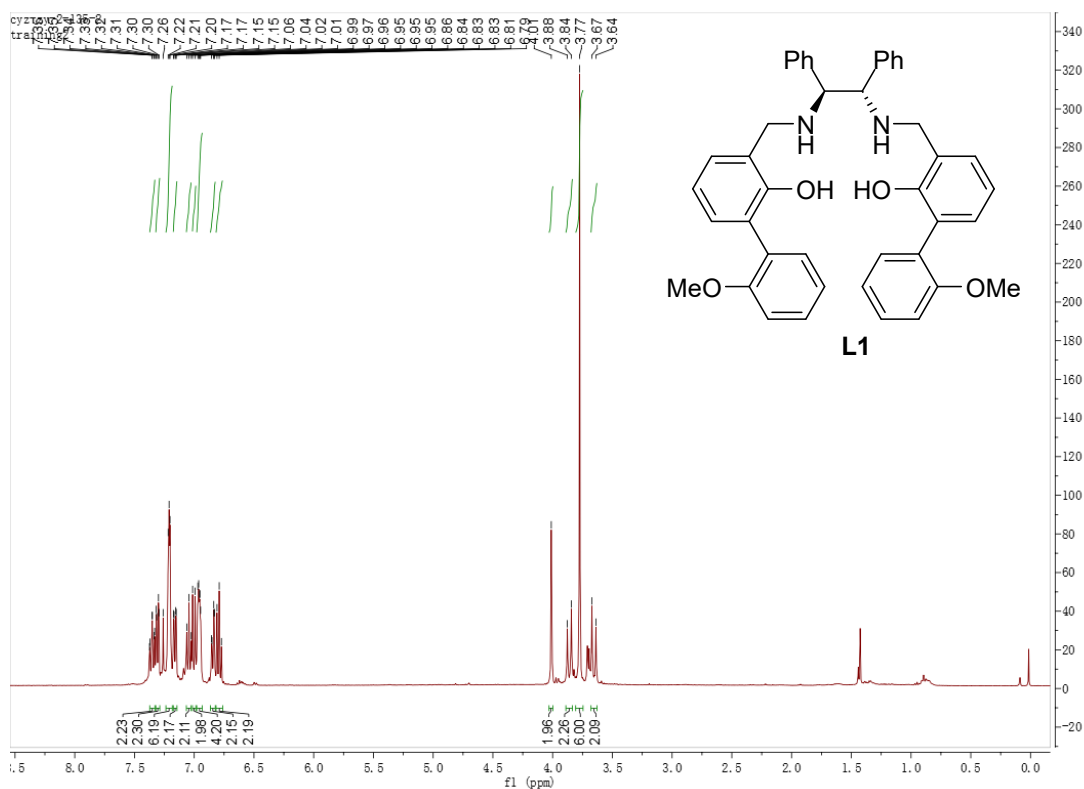

## 10.2 $\beta$ -keto esters

### $^1\text{H}$ NMR of compound 2a

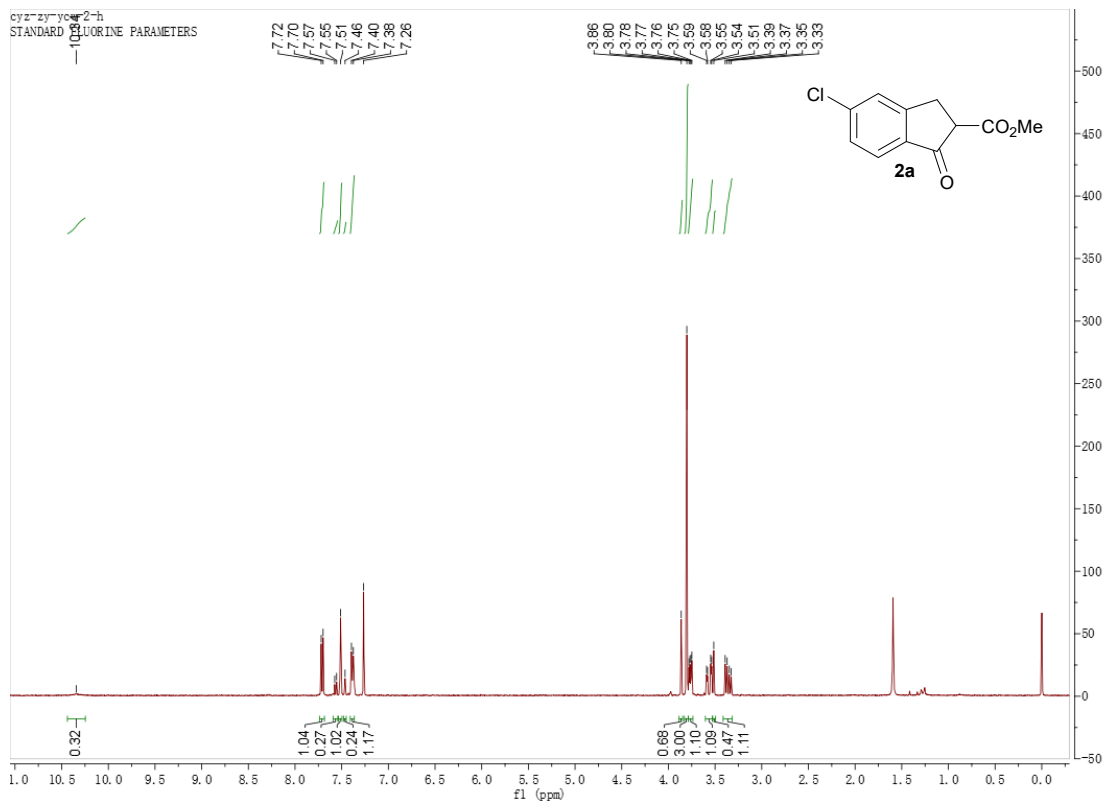

### $^{13}\text{C}$ NMR of compound 2a

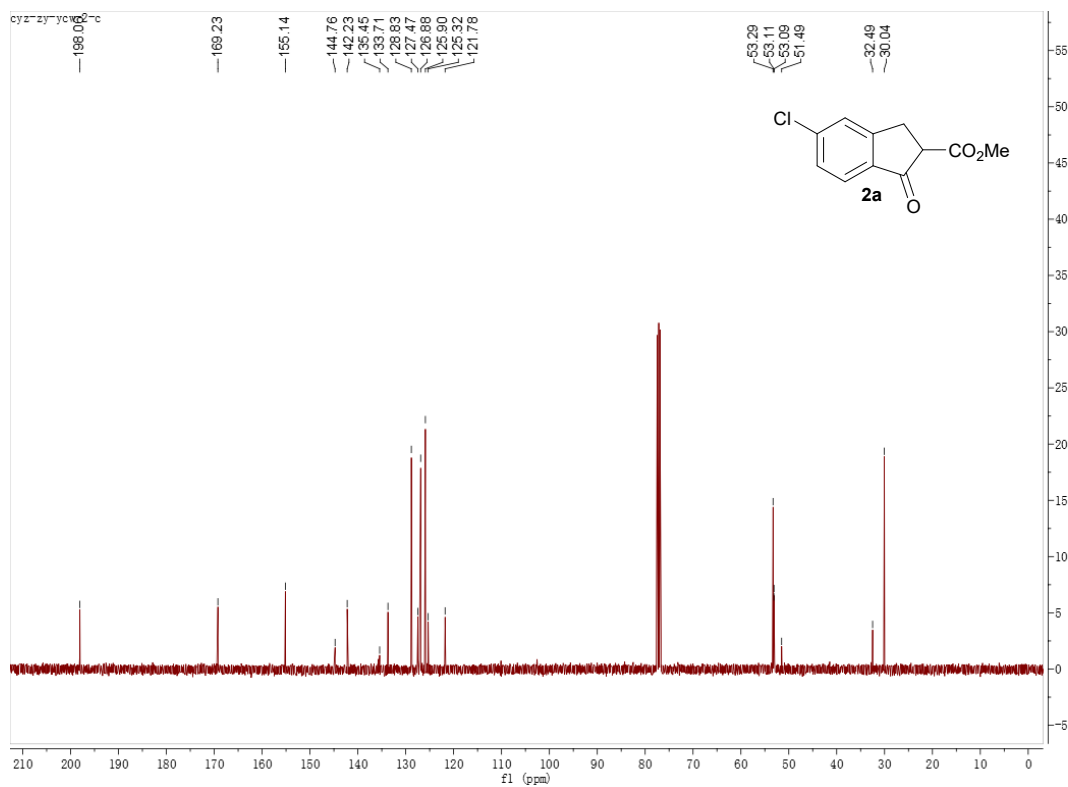



### <sup>1</sup>H NMR of compound 2b

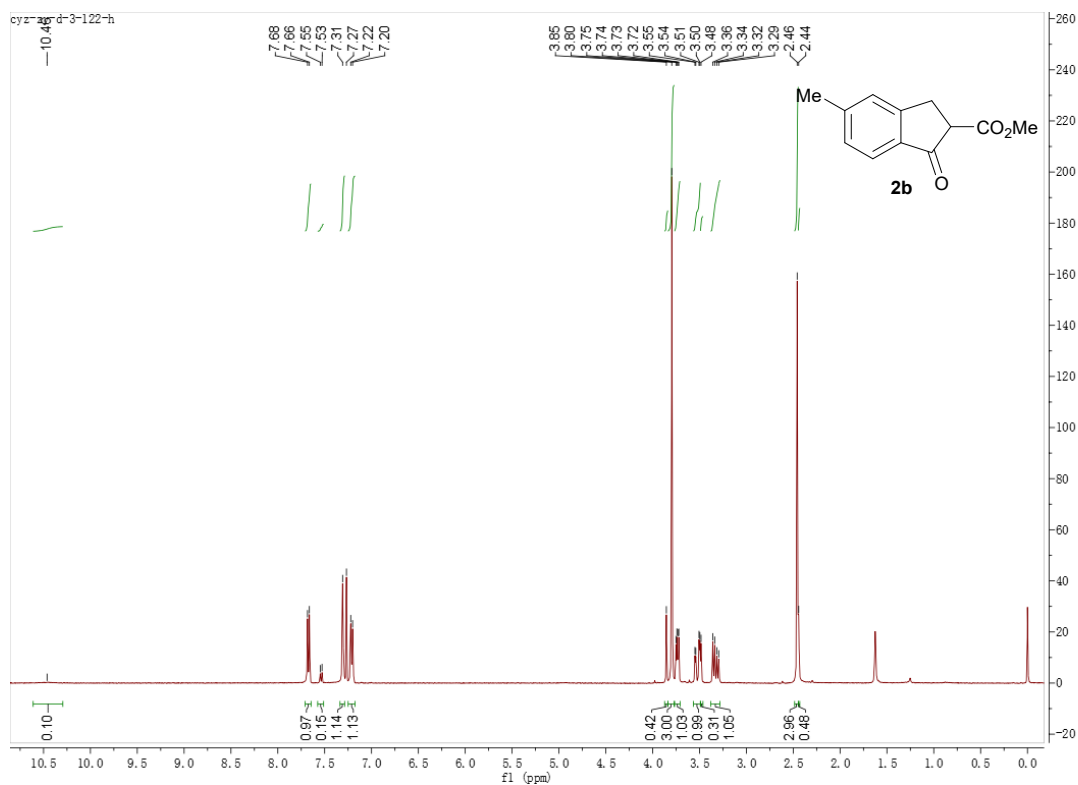

### <sup>13</sup>C NMR of compound 2b

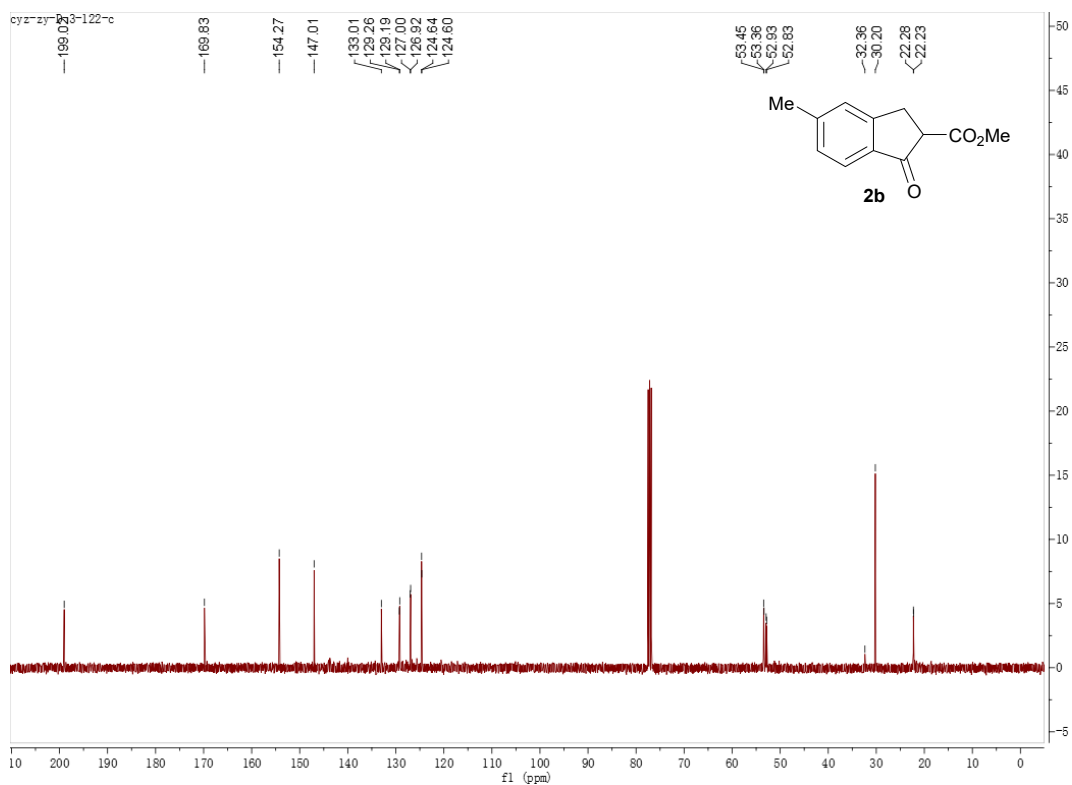

### <sup>1</sup>H NMR of compound 2c

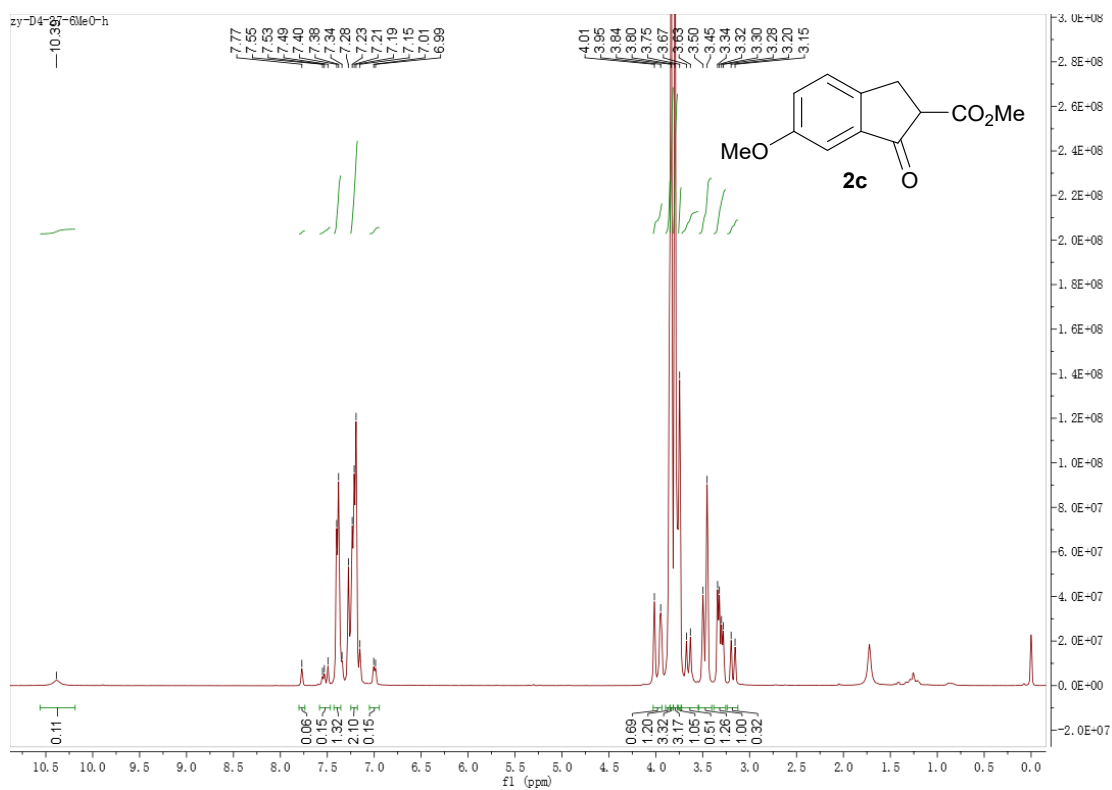

### <sup>13</sup>C NMR of compound 2c

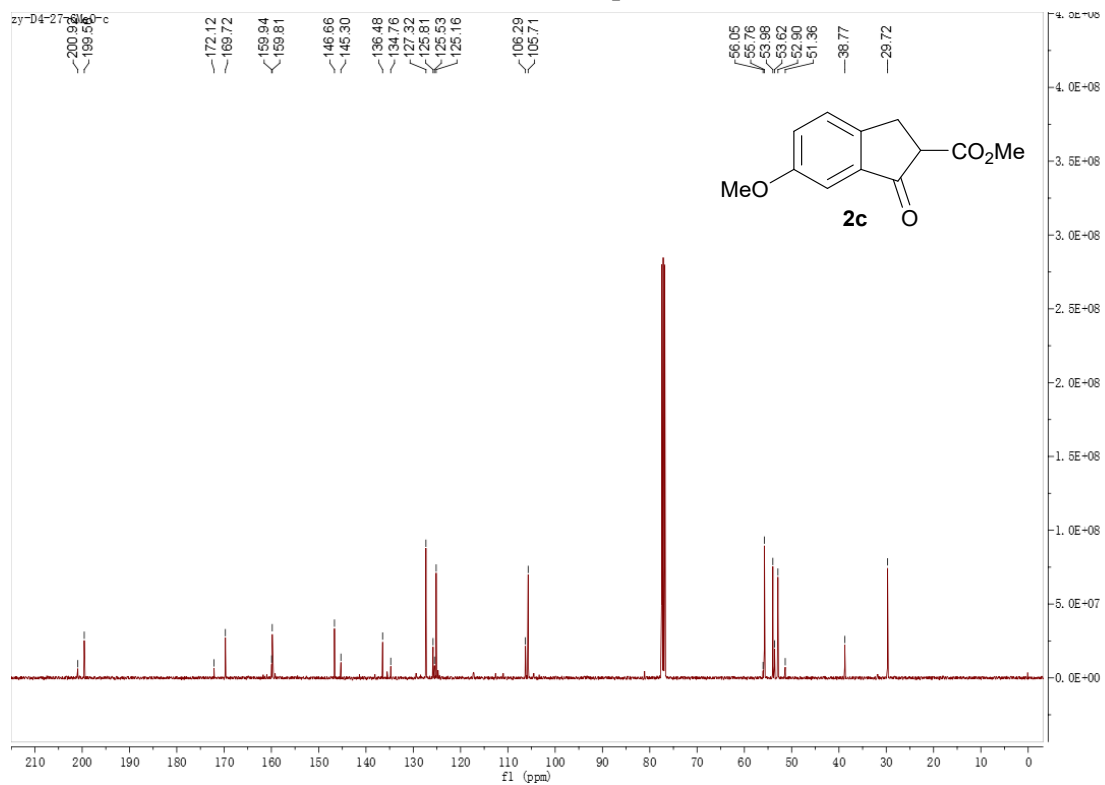

### <sup>1</sup>H NMR of compound 2d

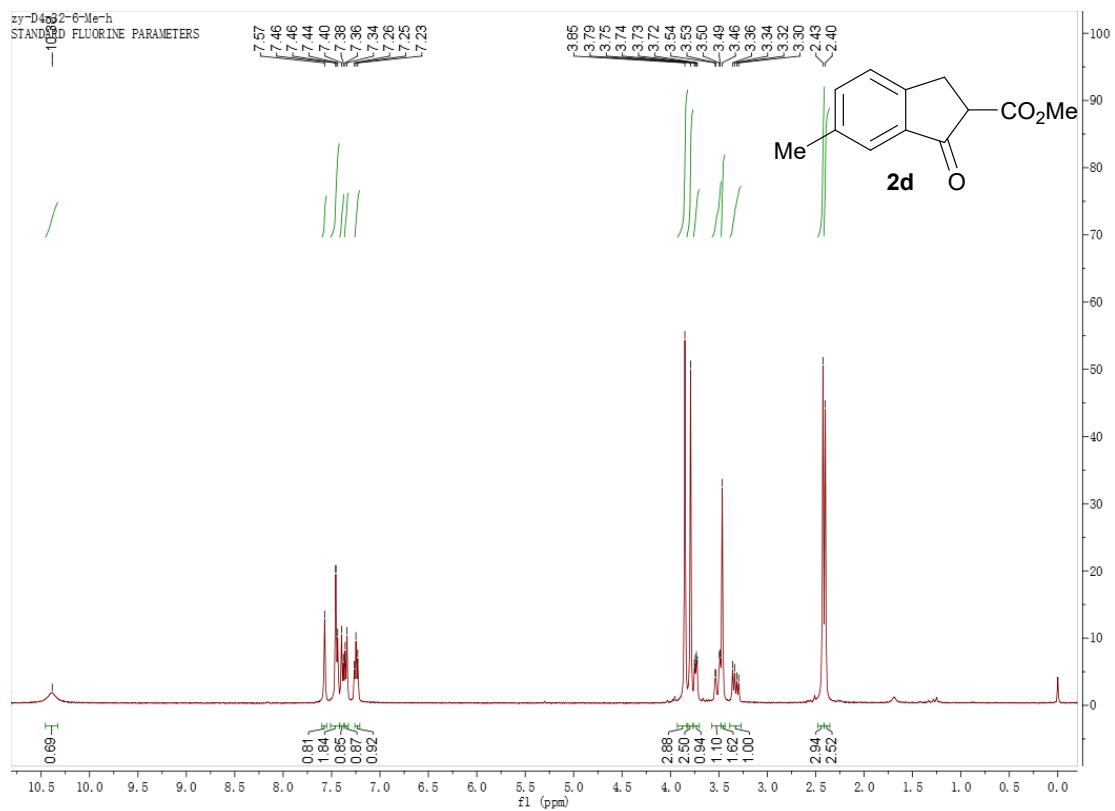

### <sup>13</sup>C NMR of compound 2d

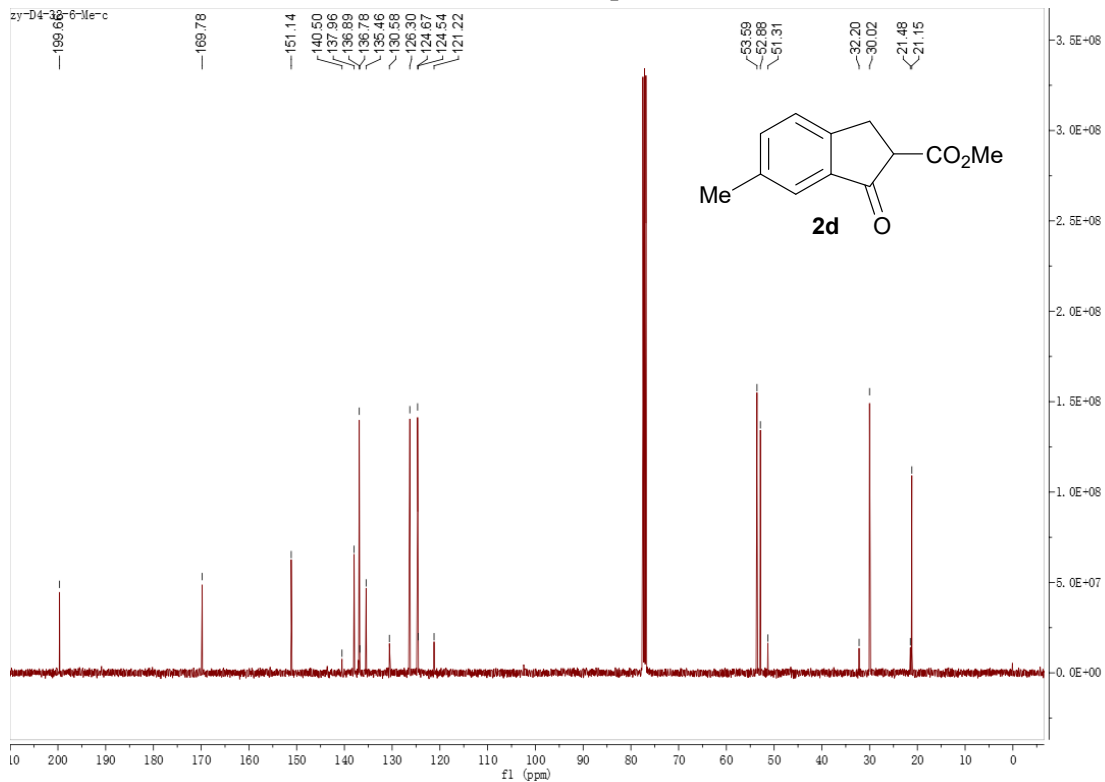

### <sup>1</sup>H NMR of compound 2e

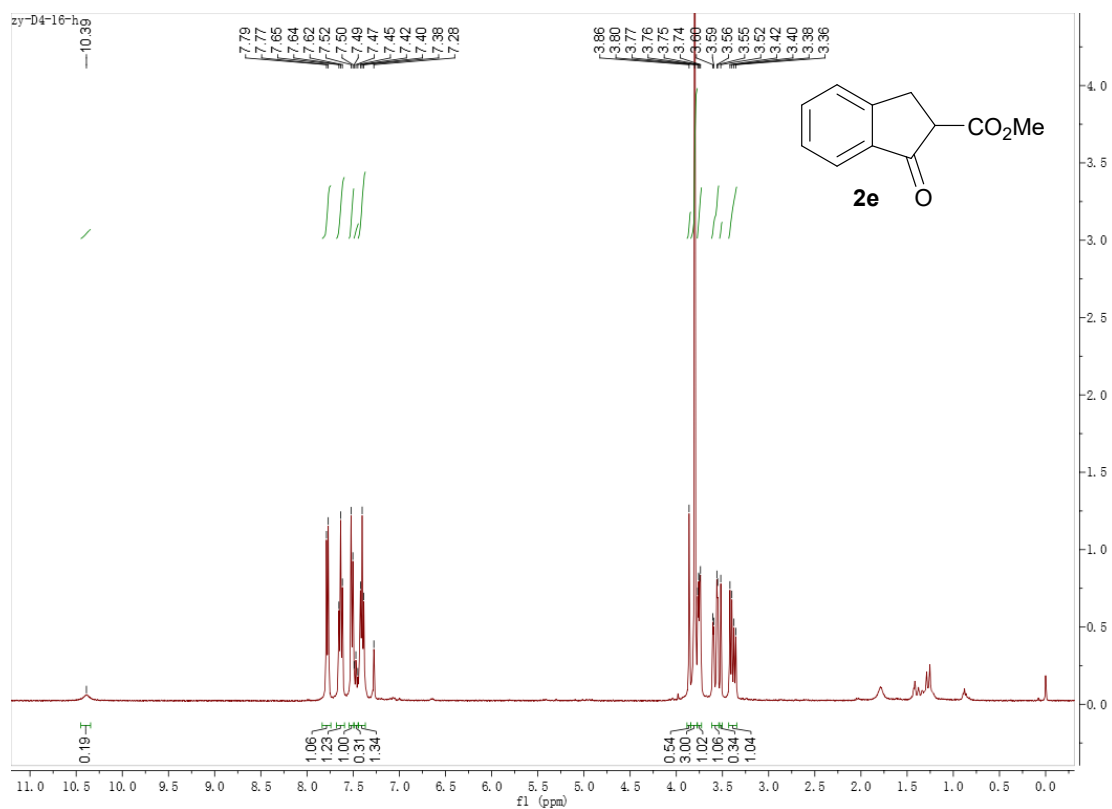

### <sup>13</sup>C NMR of compound 2e

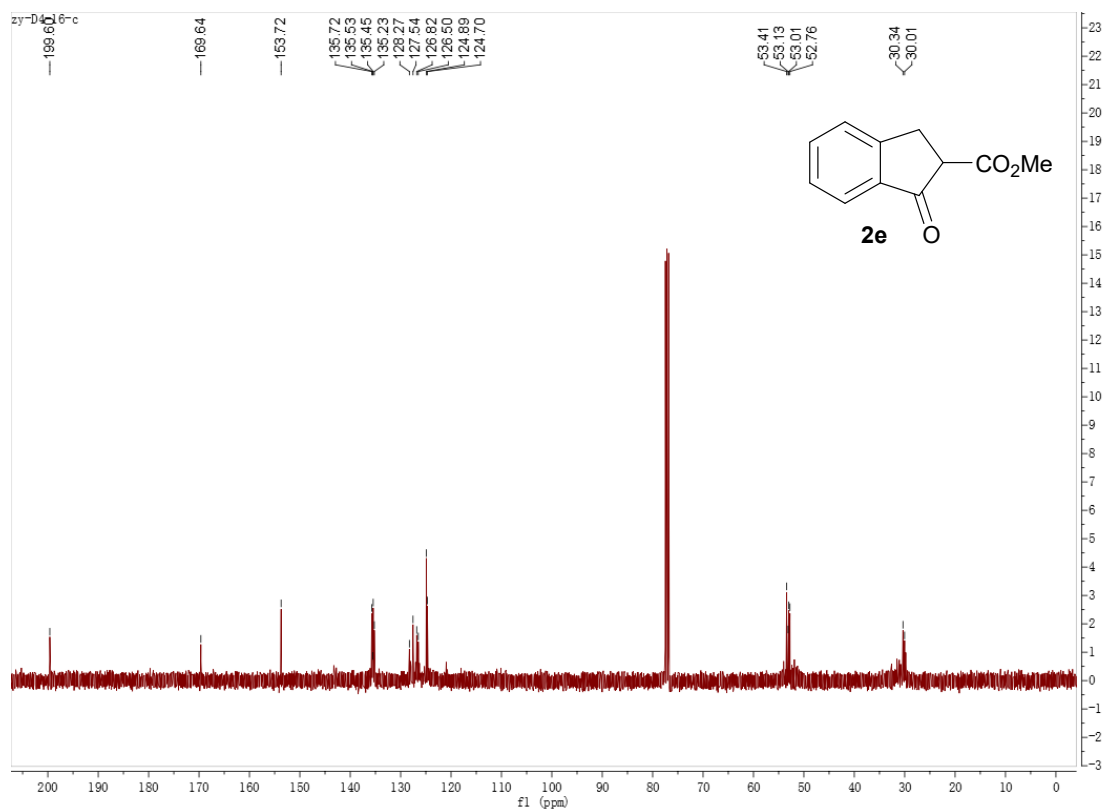

### <sup>1</sup>H NMR of compound 2f

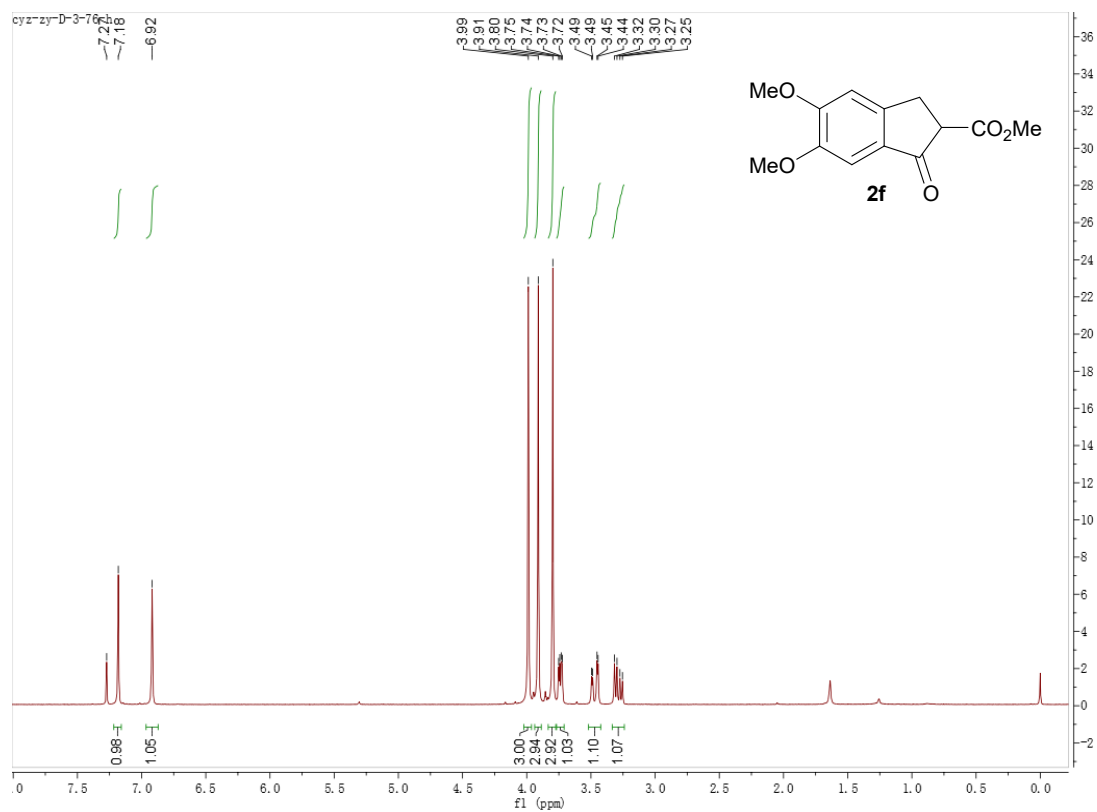

### <sup>13</sup>C NMR of compound 2f

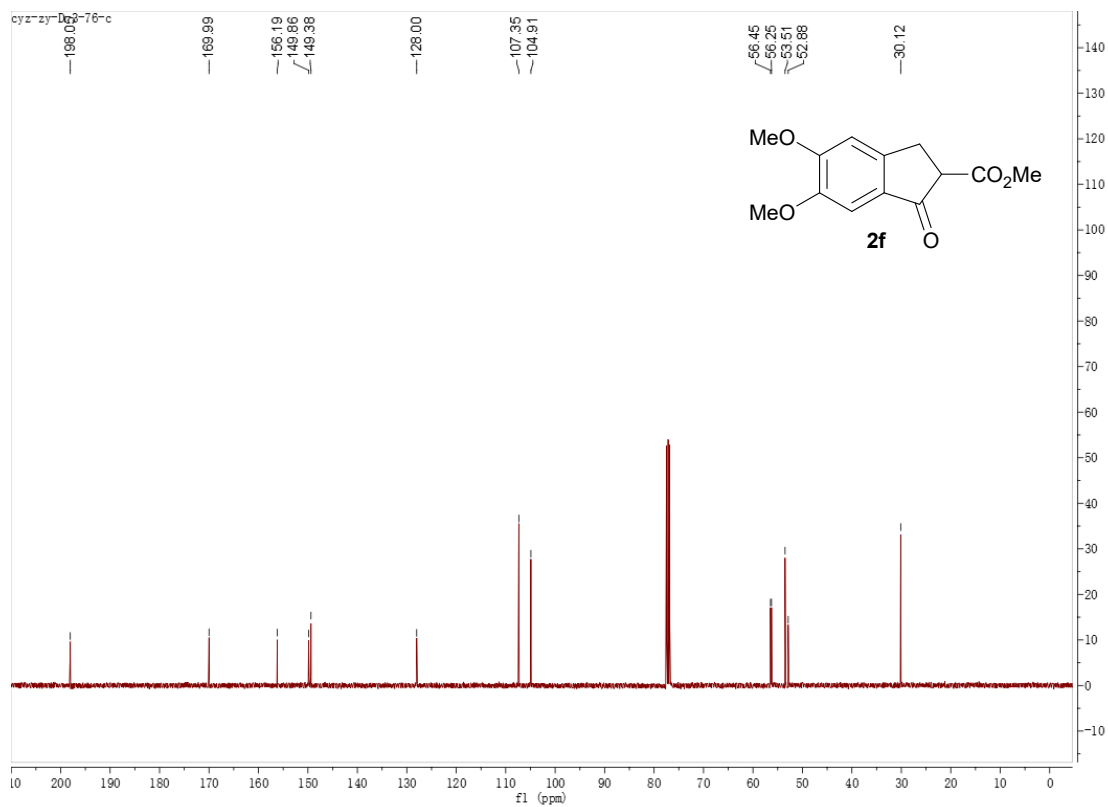

### <sup>1</sup>H NMR of compound 2g

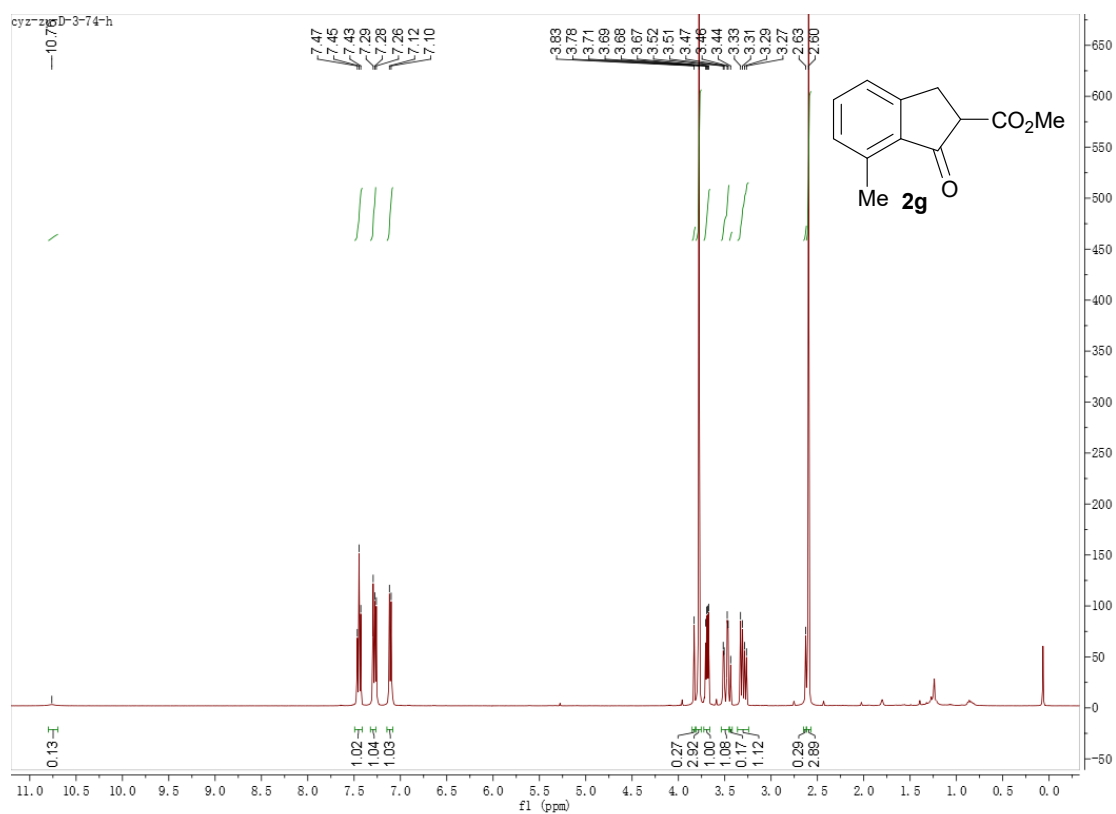

### <sup>13</sup>C NMR of compound 2g

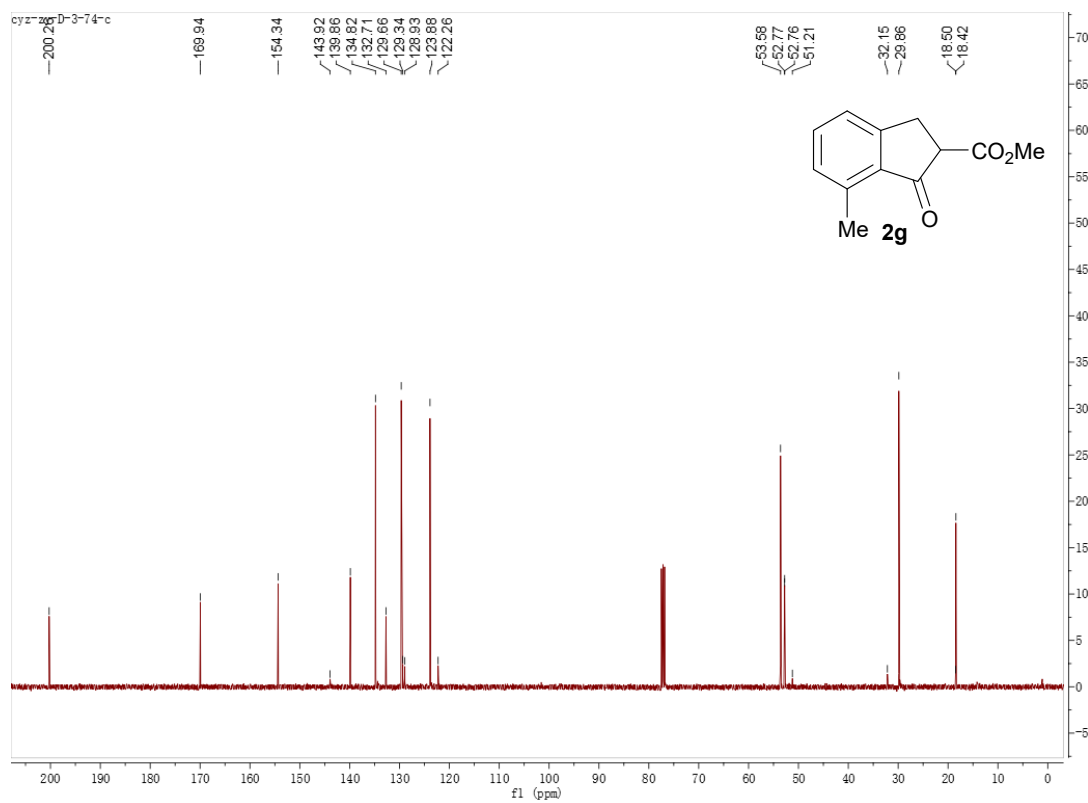

### <sup>1</sup>H NMR of compound 2h

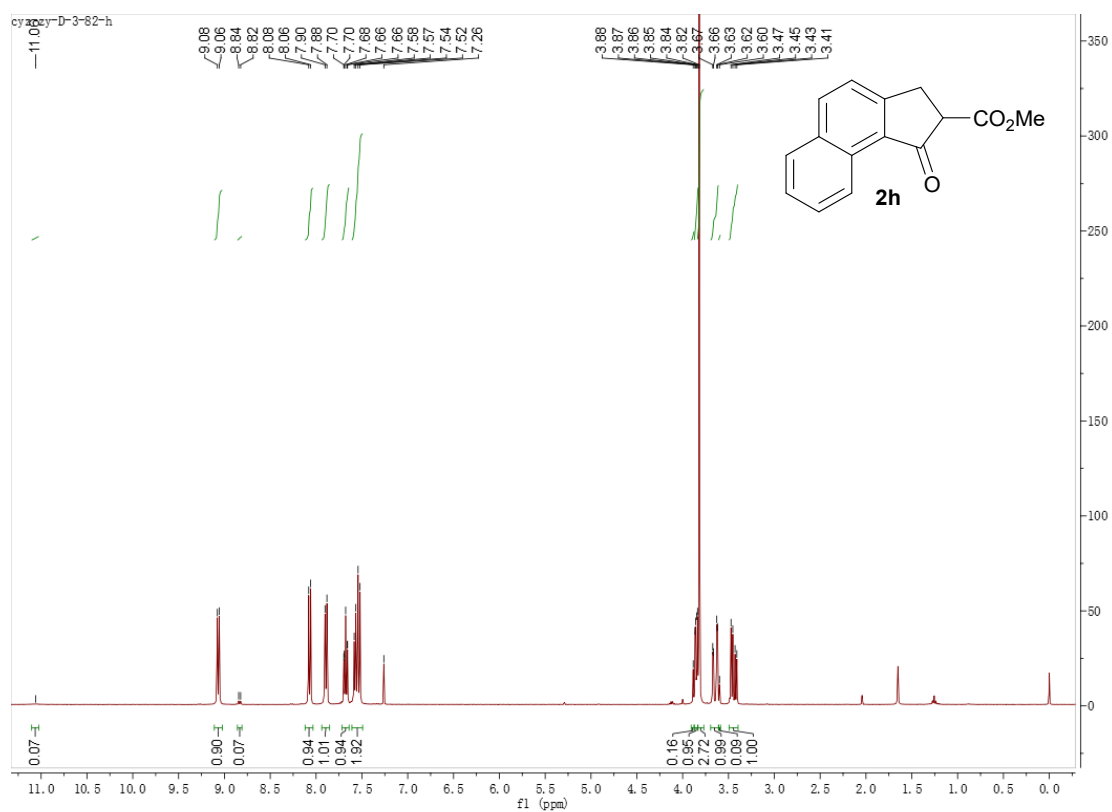

### <sup>13</sup>C NMR of compound 2h

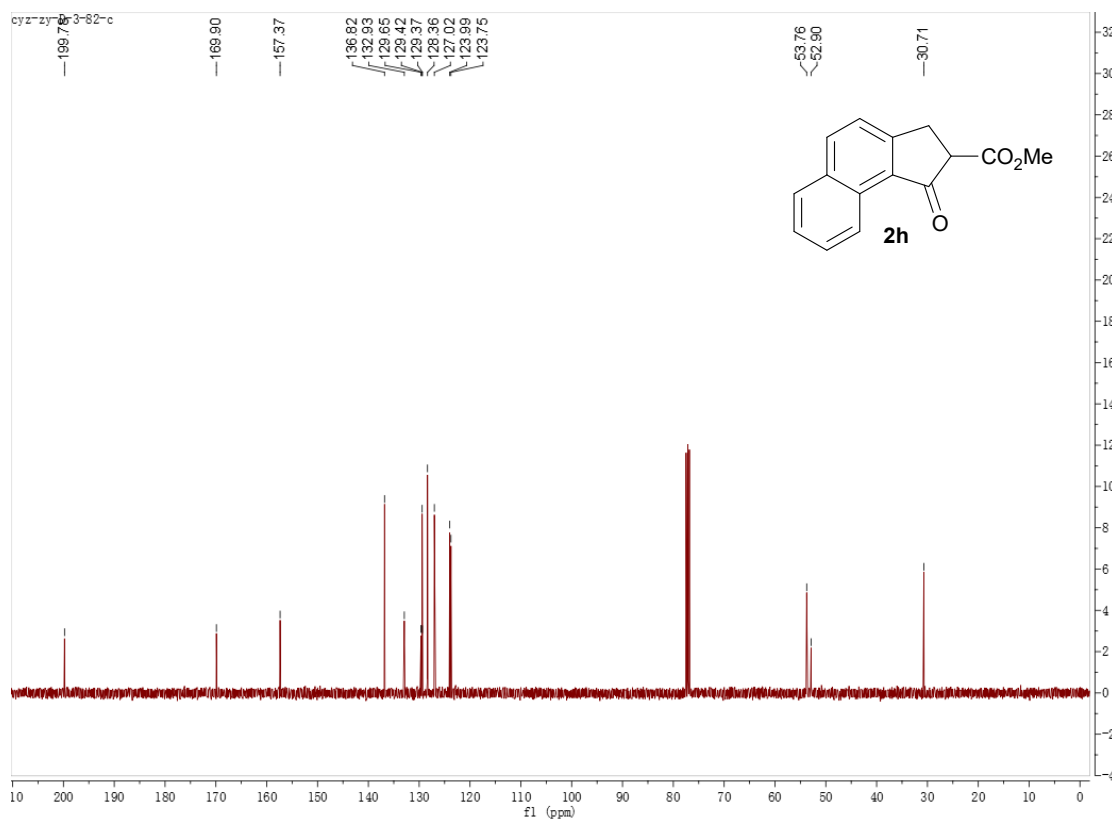

### <sup>1</sup>H NMR of compound 2i

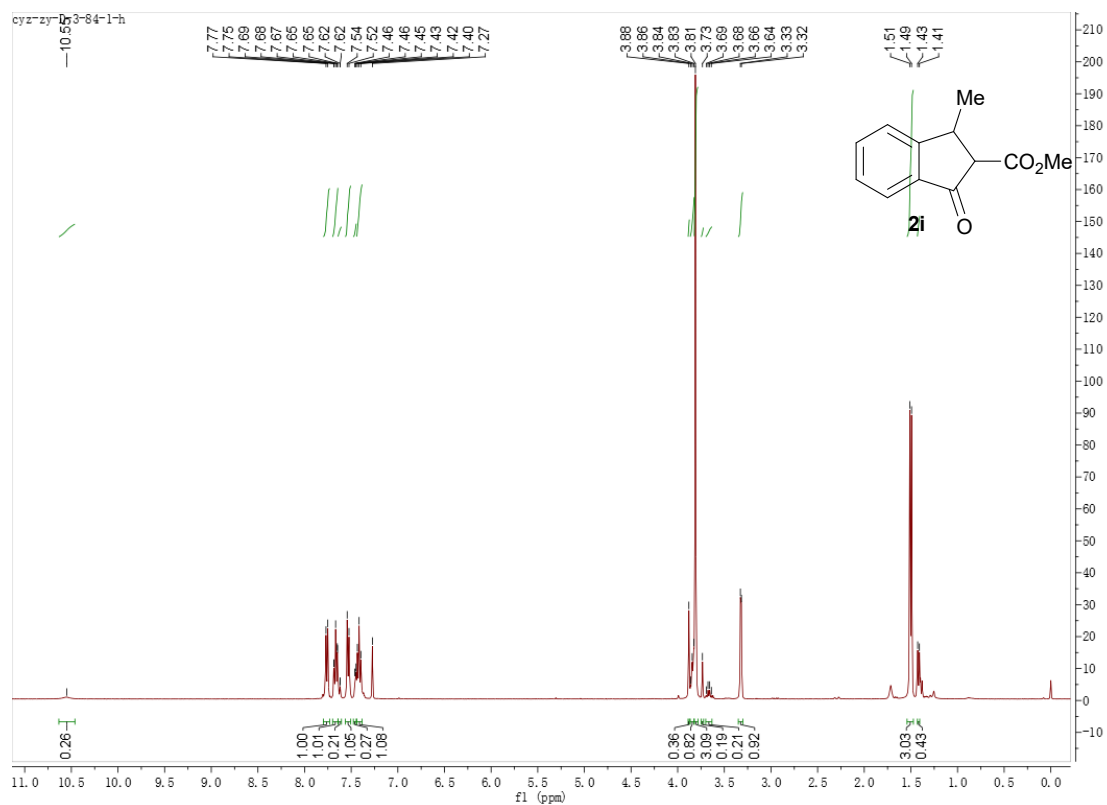

### <sup>13</sup>C NMR of compound 2i

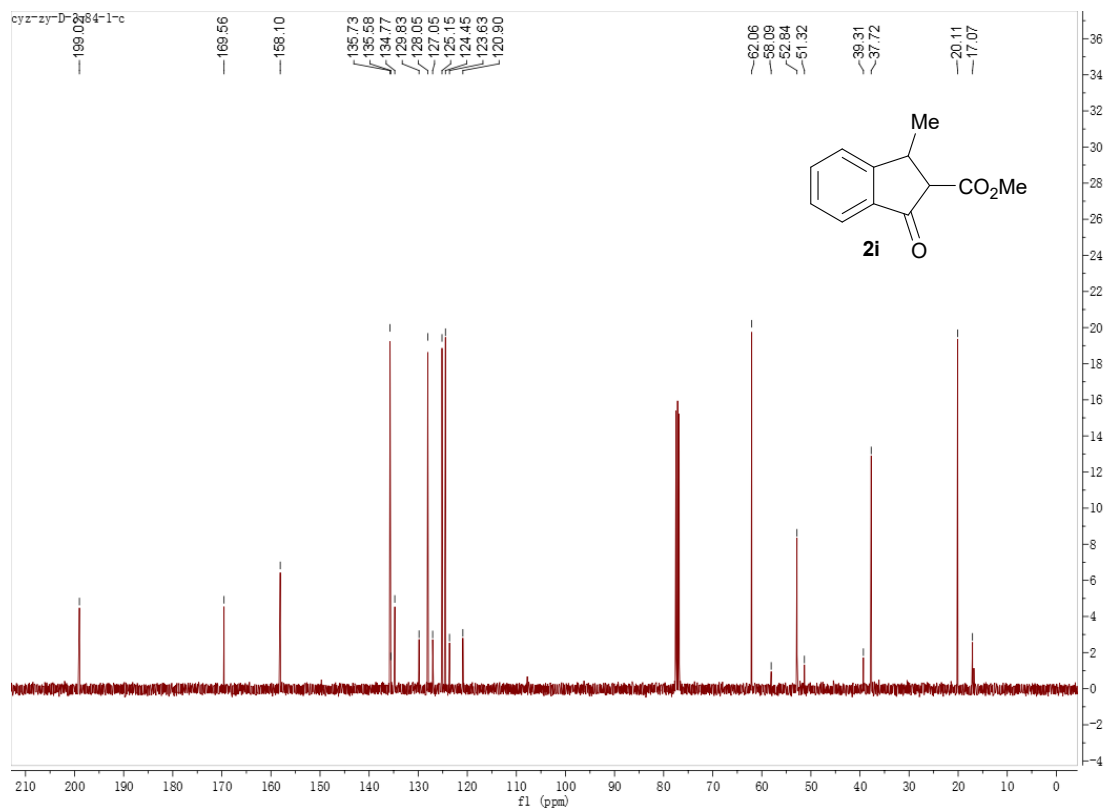



### <sup>1</sup>H NMR of compound 2j

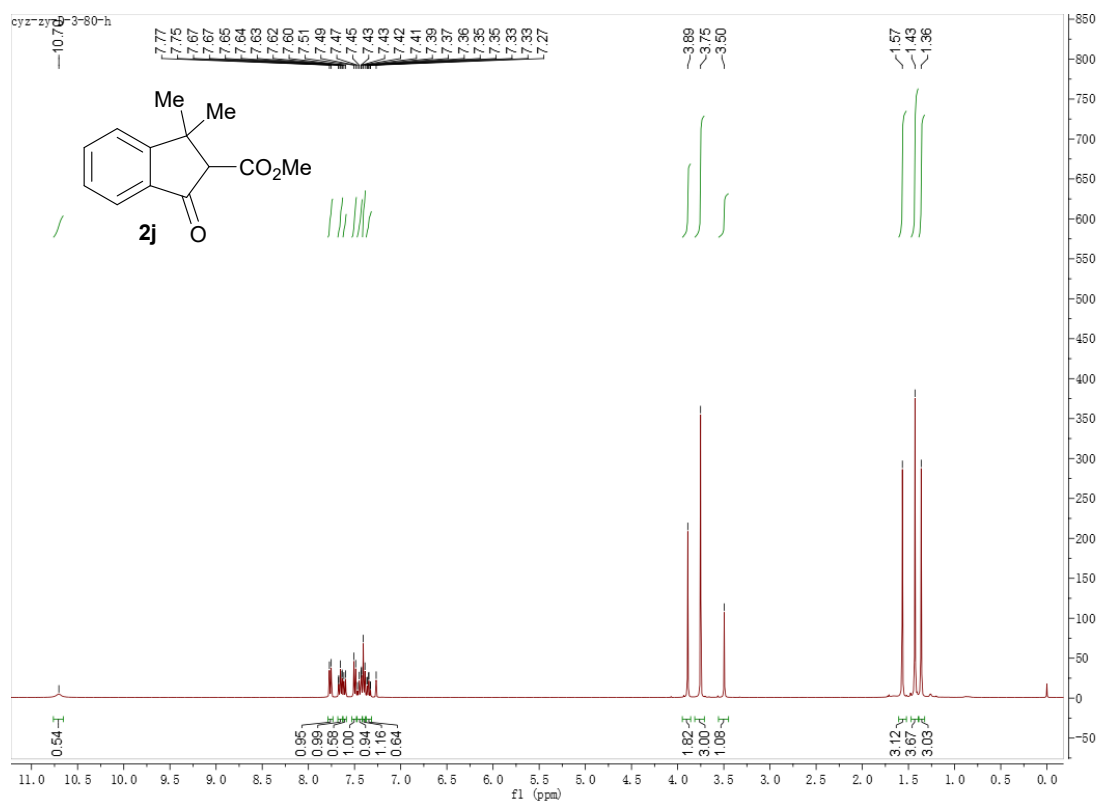

### <sup>13</sup>C NMR of compound 2j

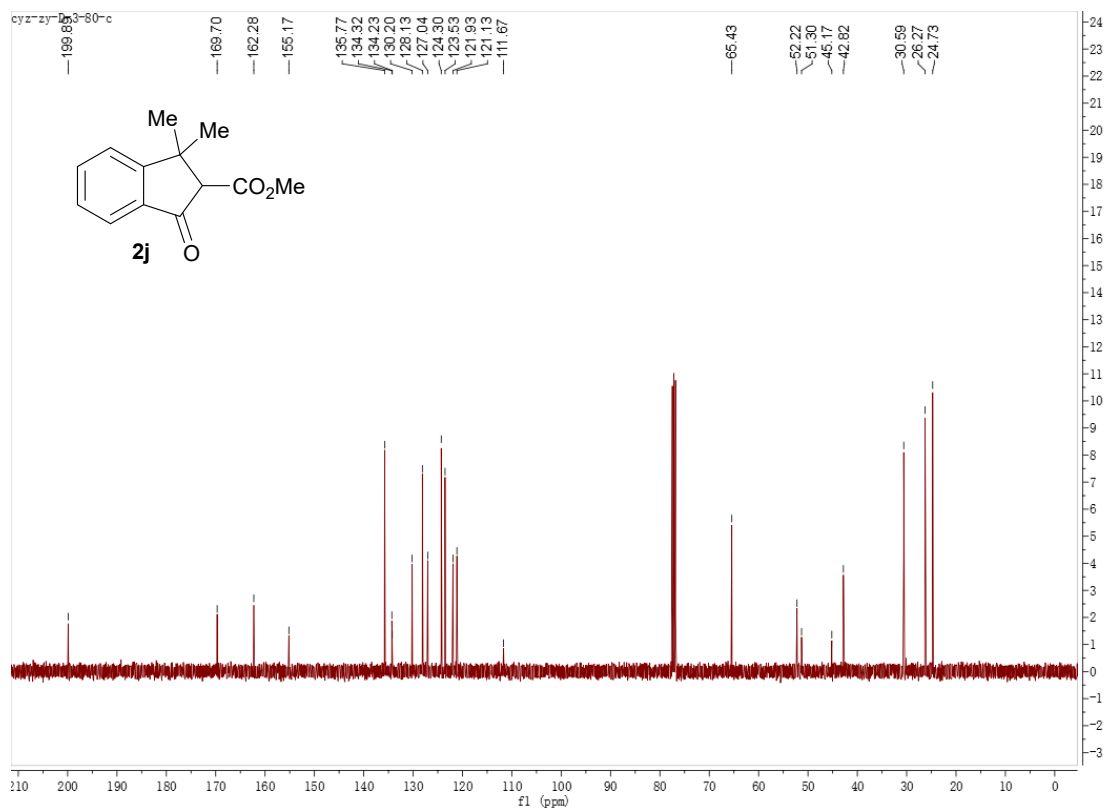

### <sup>1</sup>H NMR of compound 2k

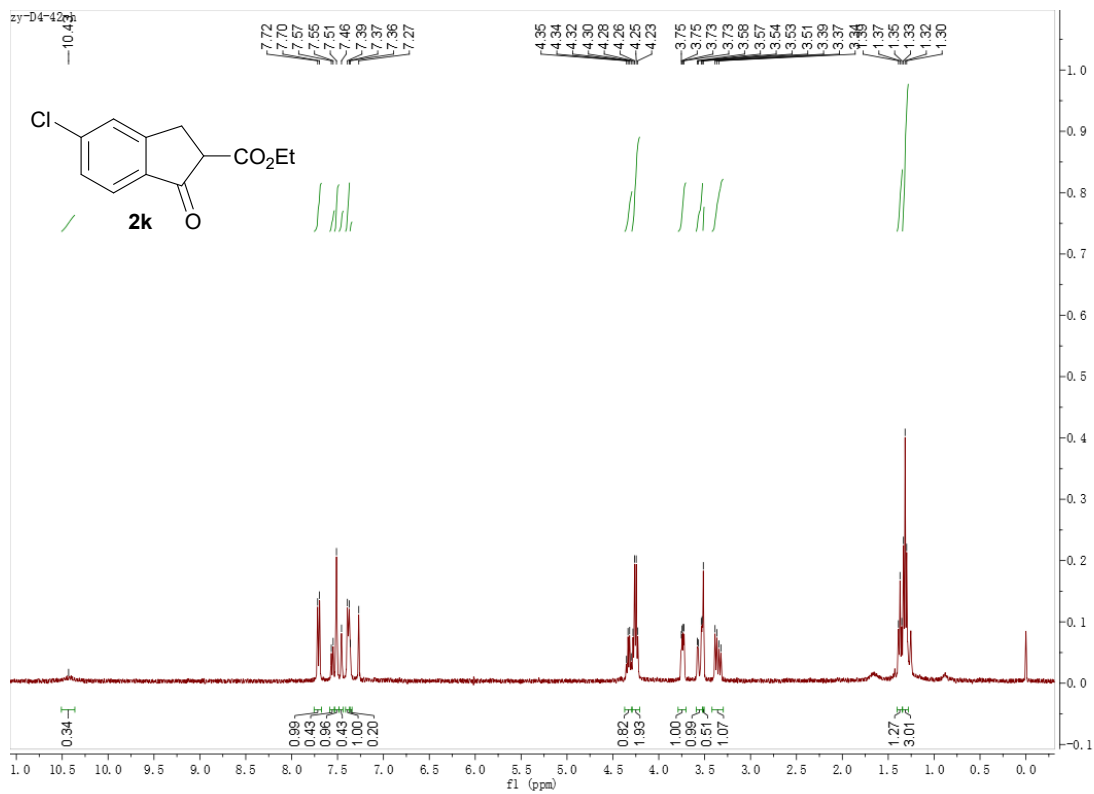

### <sup>13</sup>C NMR of compound 2k

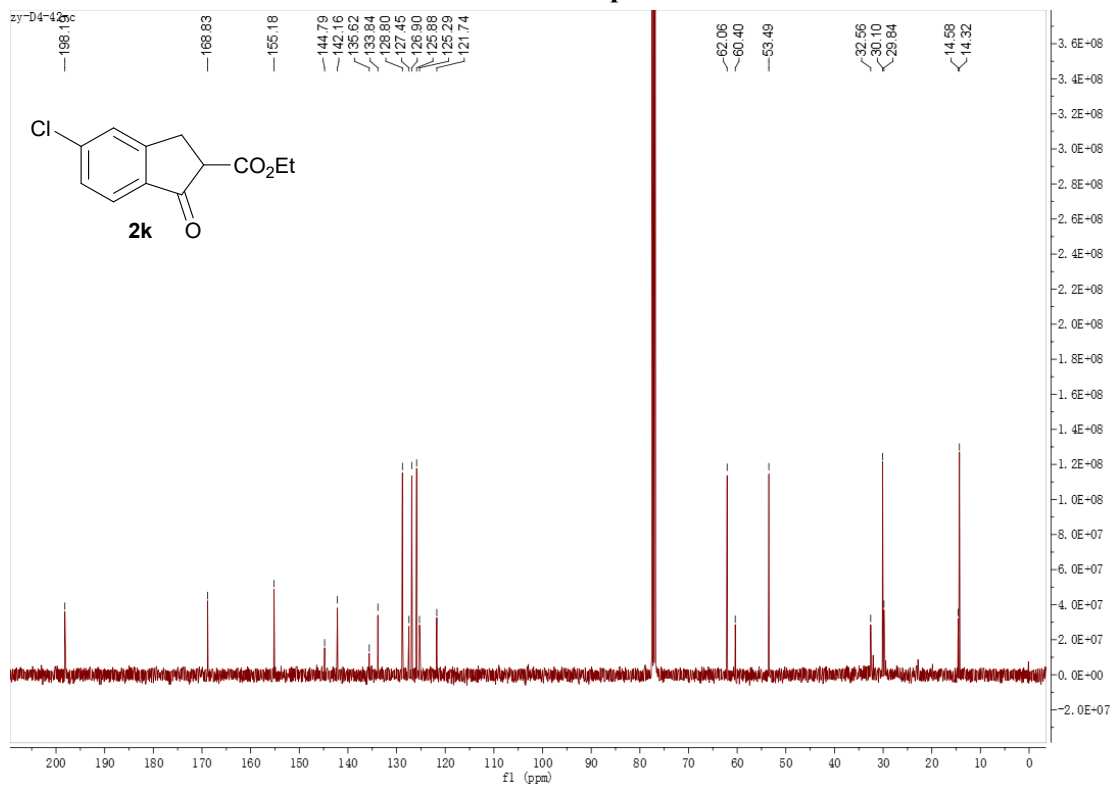

### 10.3 The products of enantioselective hydroxylation

#### <sup>1</sup>H NMR of compound 1a

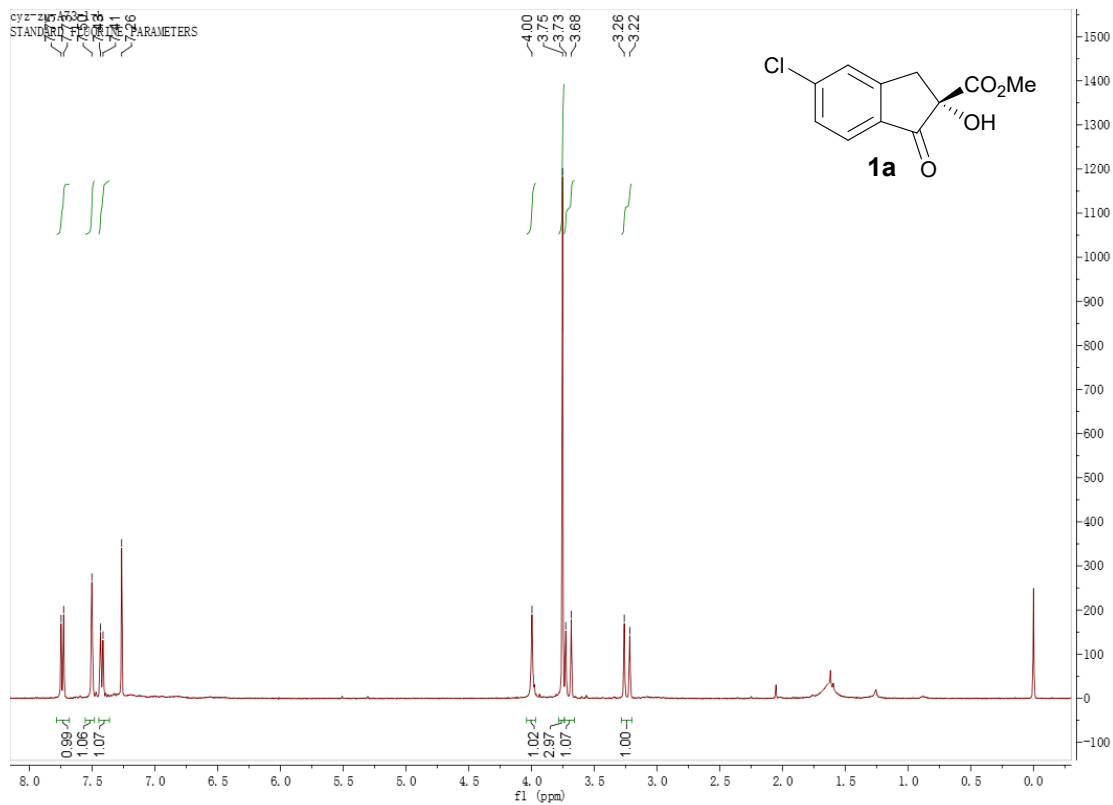

#### <sup>13</sup>C NMR of compound 1a

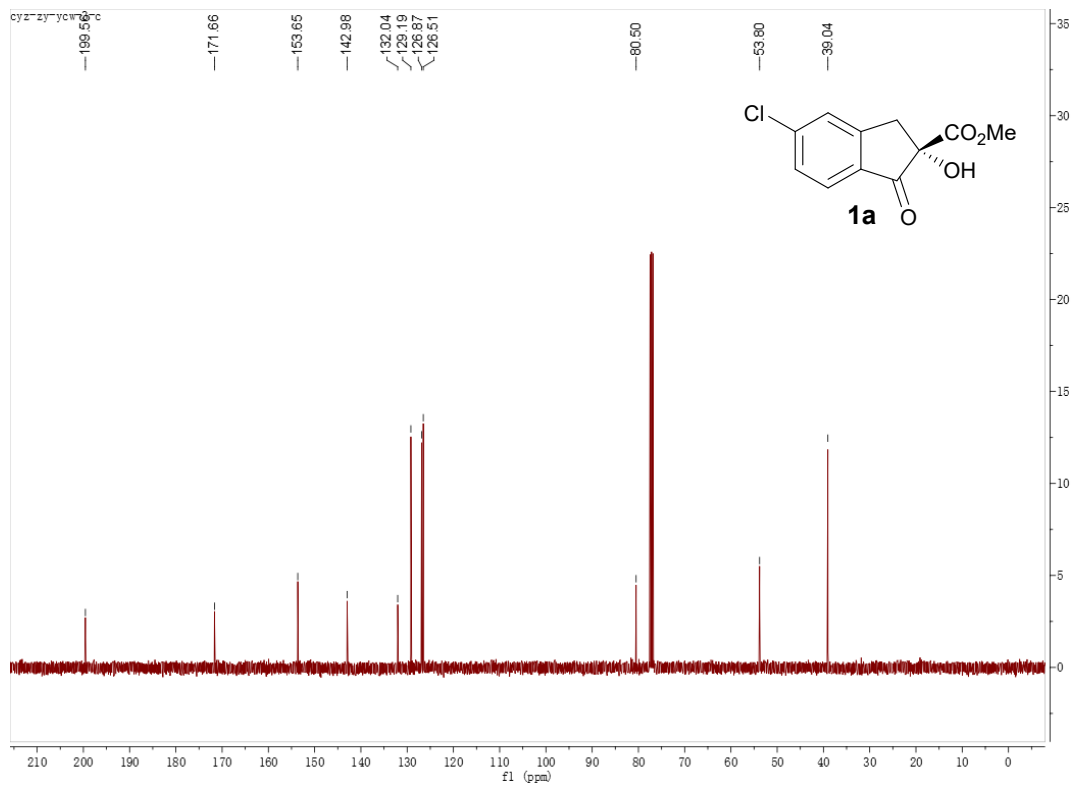

### <sup>1</sup>H NMR of compound 1b

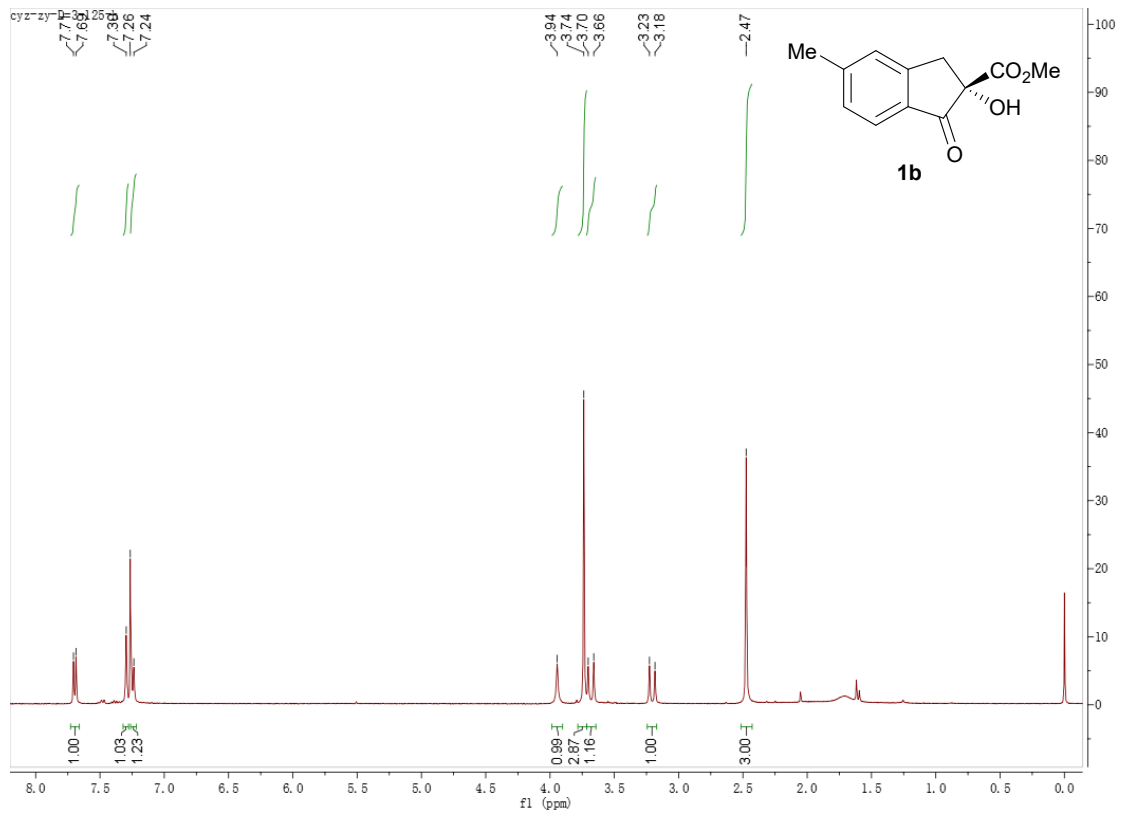

### <sup>13</sup>C NMR of compound 1b

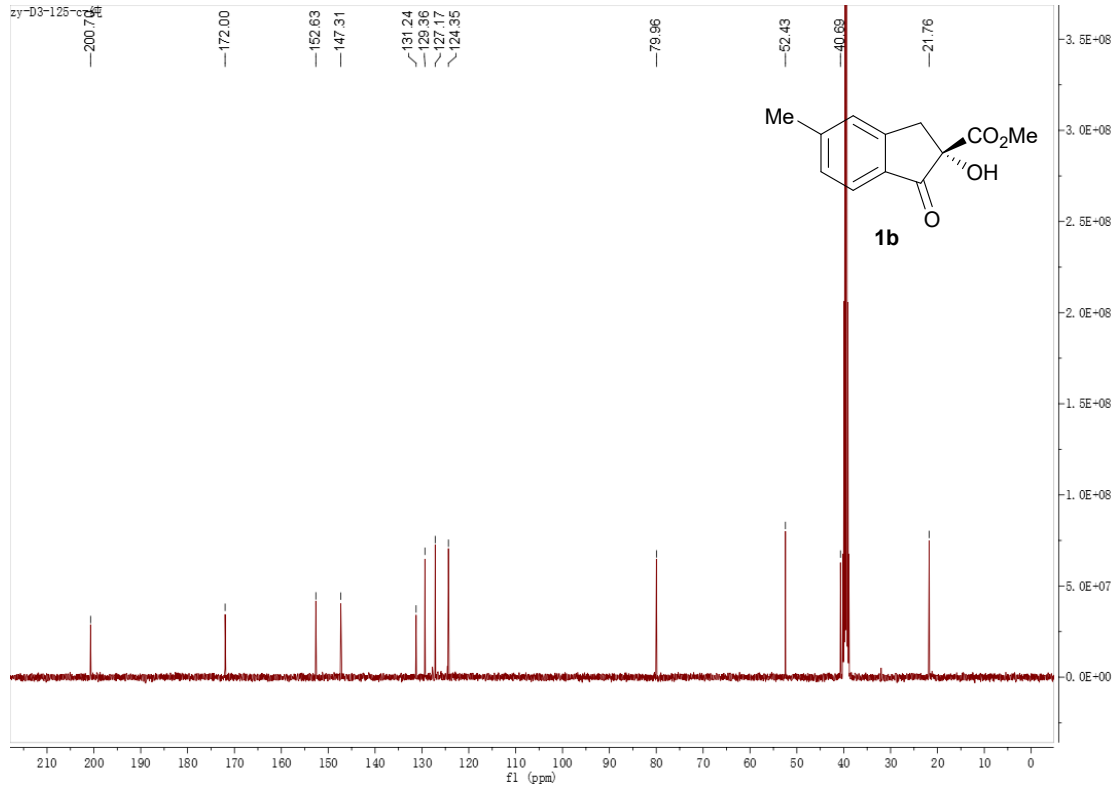

### <sup>1</sup>H NMR of compound 1c

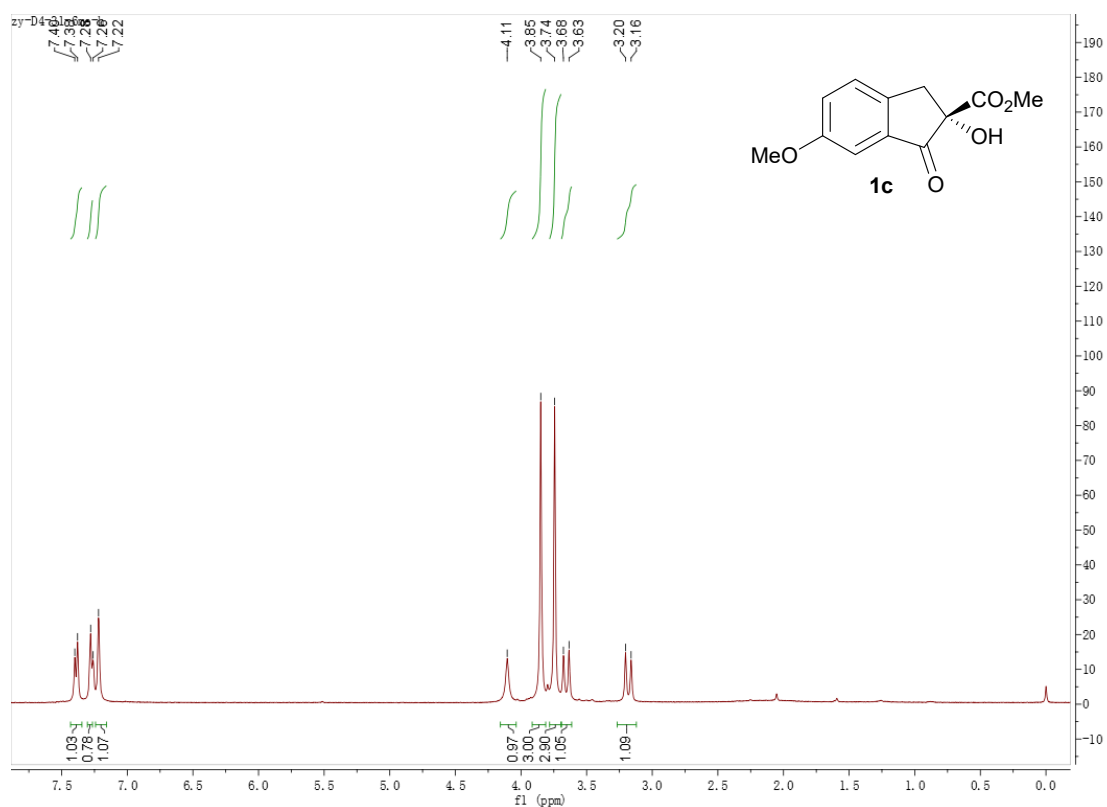

### <sup>13</sup>C NMR of compound 1c

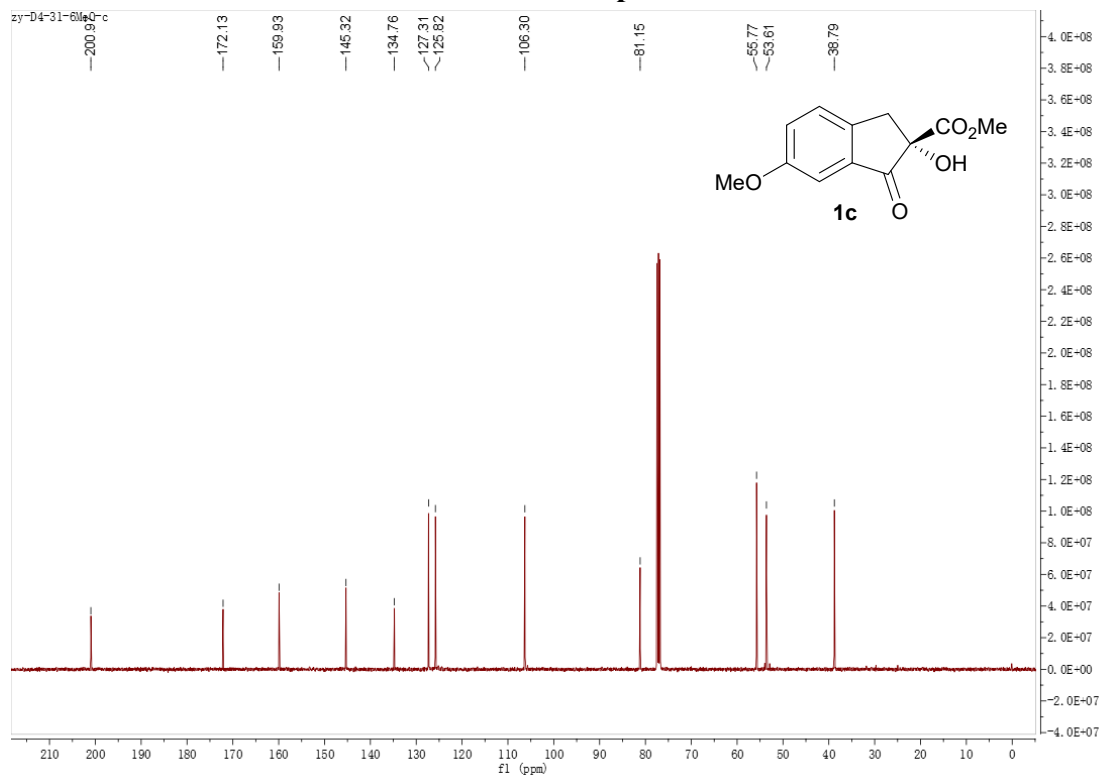

### <sup>1</sup>H NMR of compound 1d

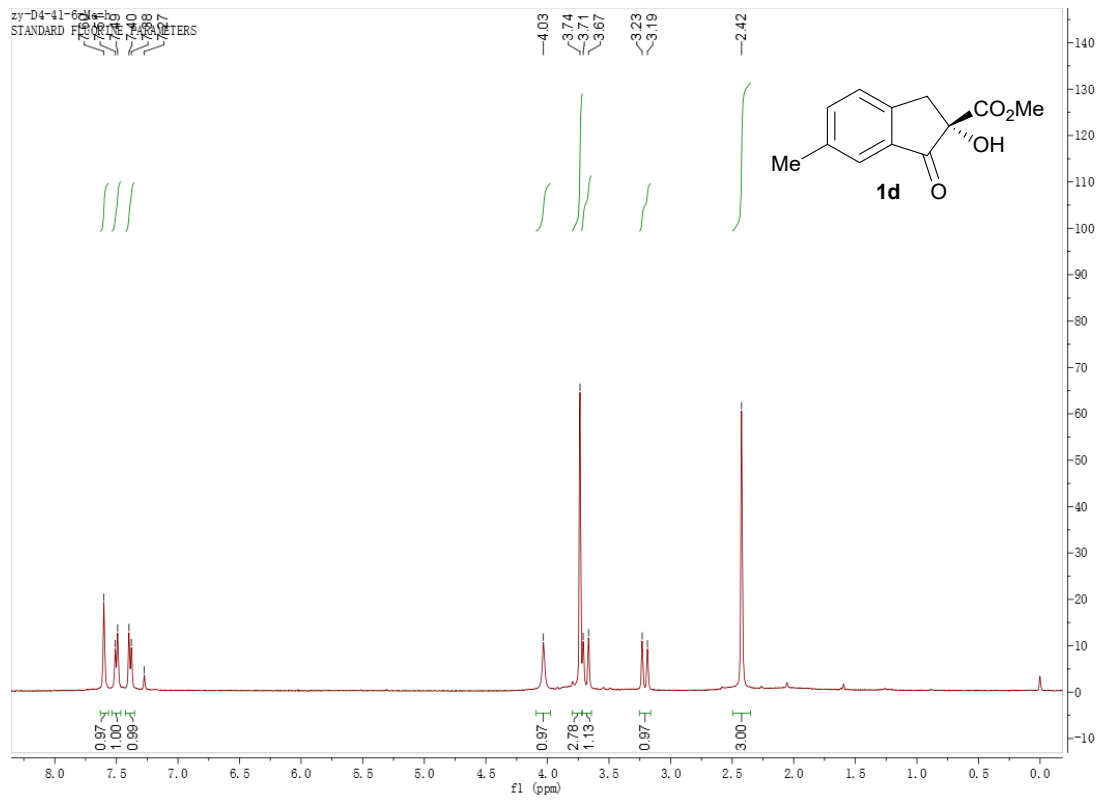

### <sup>13</sup>C NMR of compound 1d

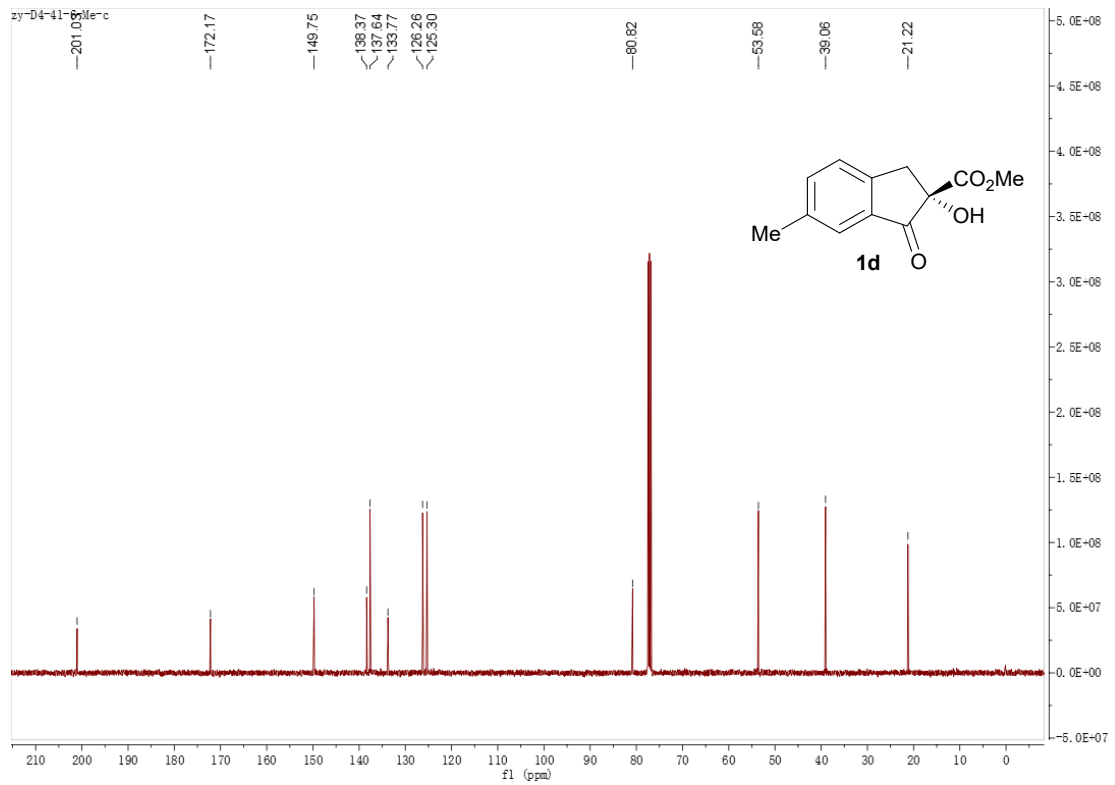

### <sup>1</sup>H NMR of compound 1e

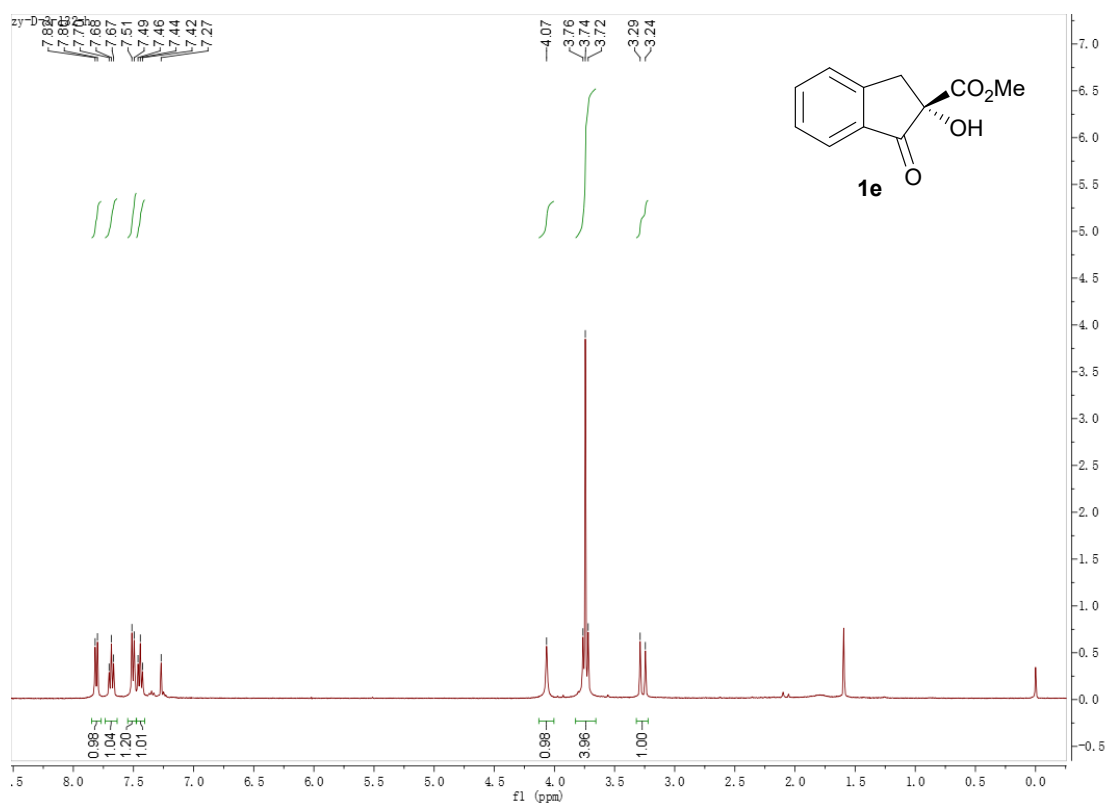

### <sup>13</sup>C NMR of compound 1e

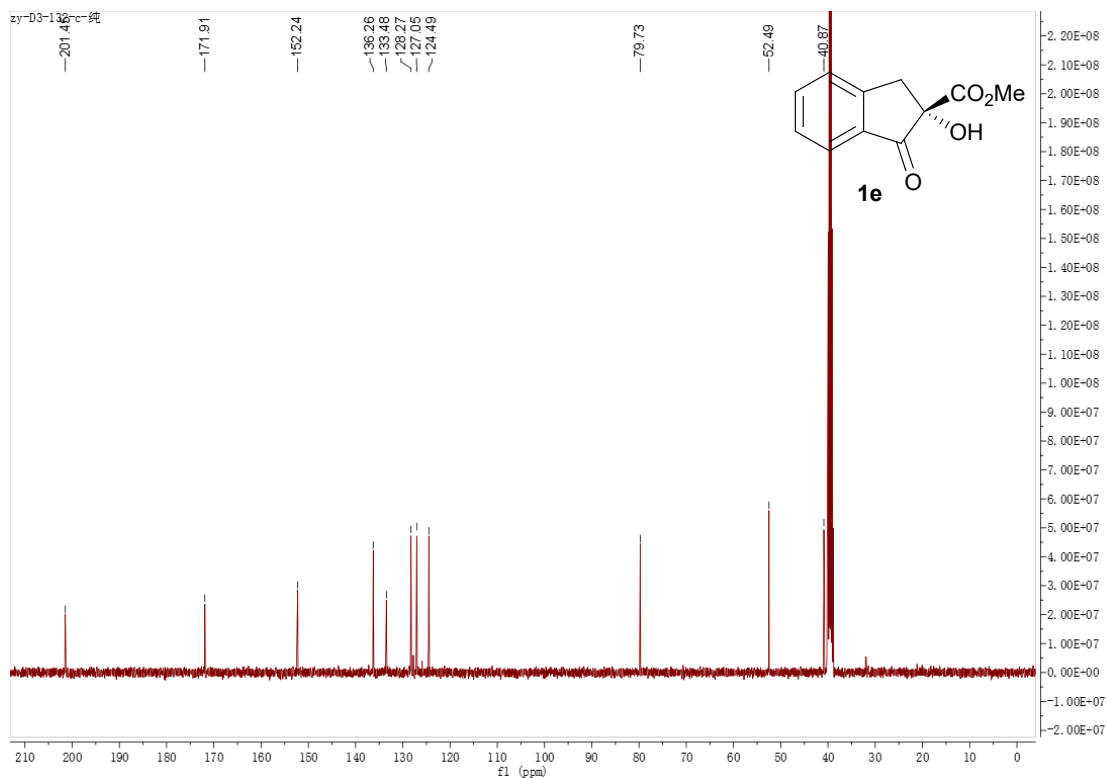

### <sup>1</sup>H NMR of compound 1f

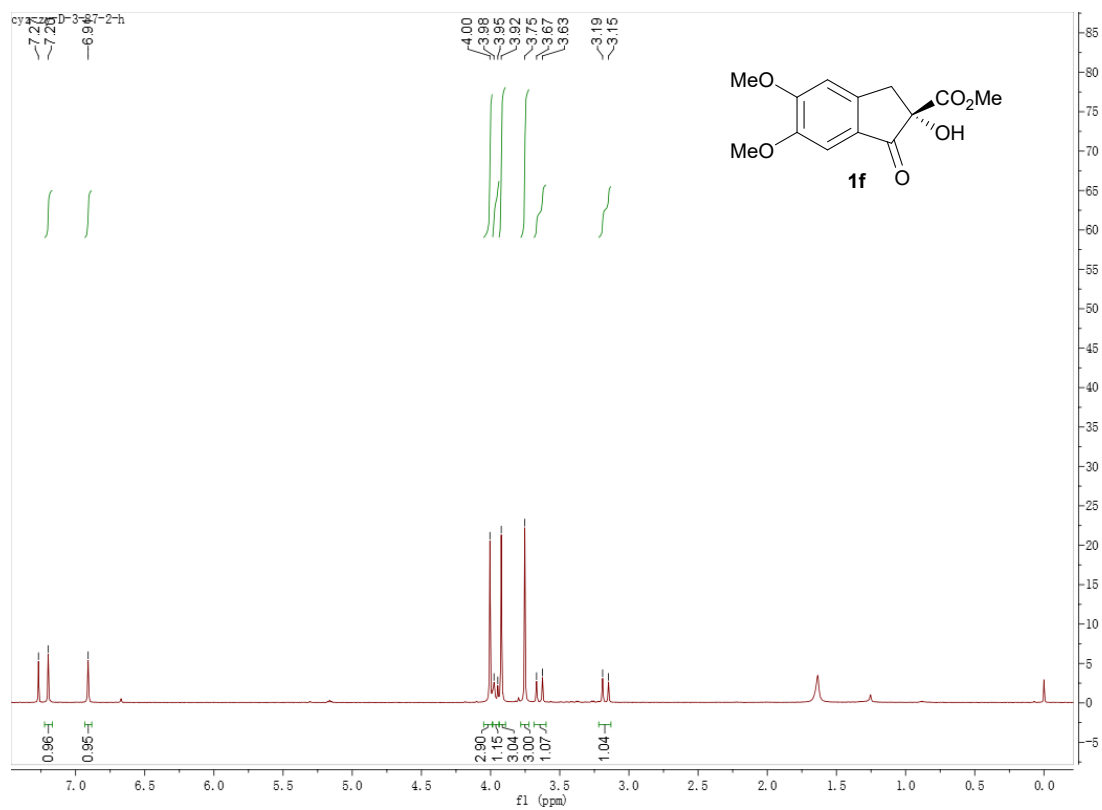

### <sup>13</sup>C NMR of compound 1f

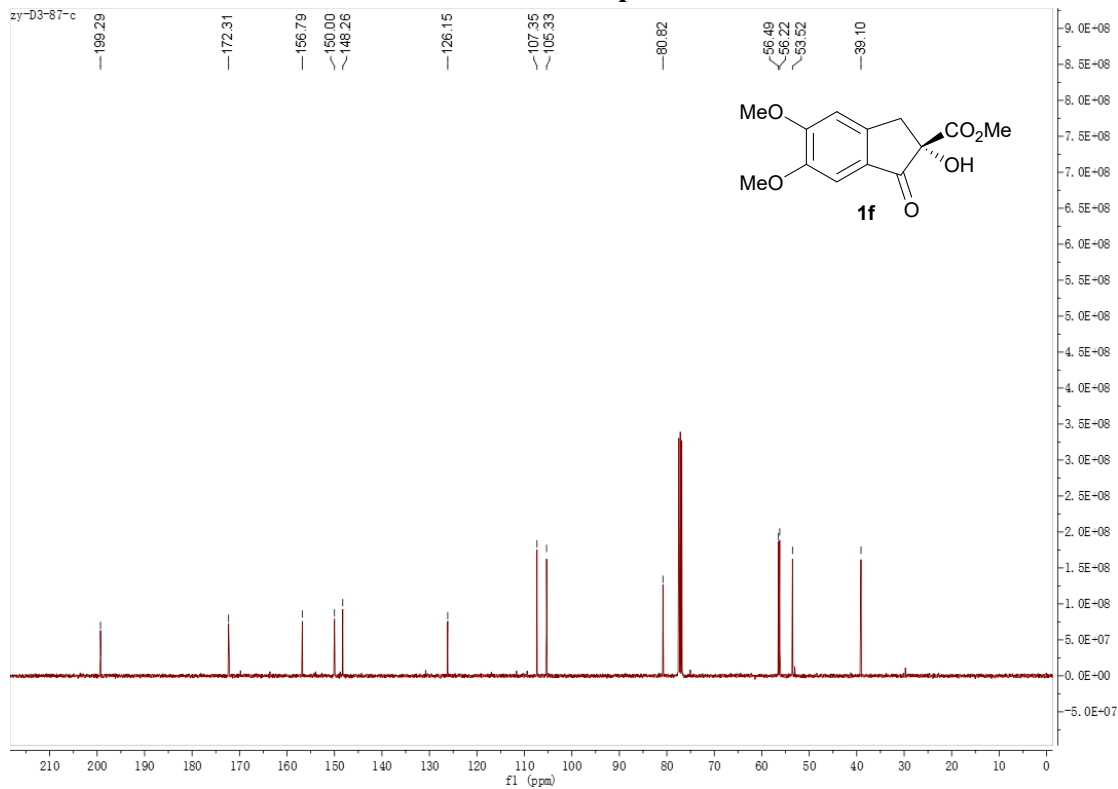



### <sup>1</sup>H NMR of compound 1g

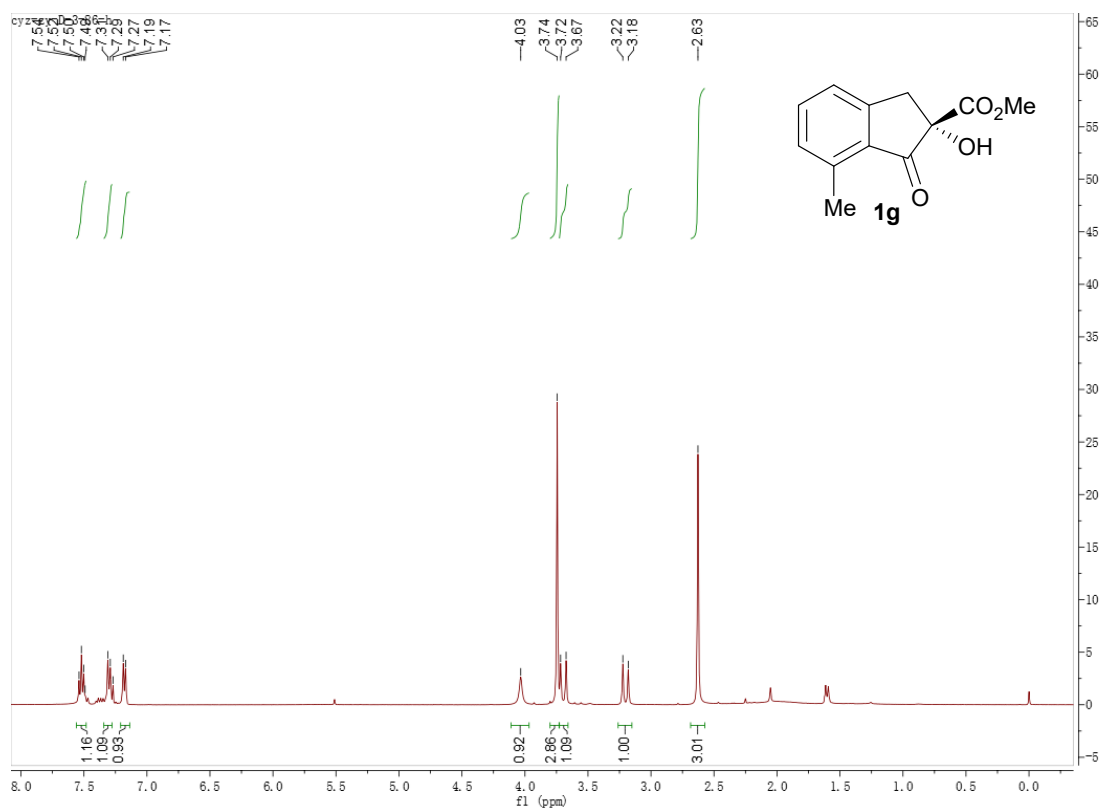

### <sup>13</sup>C NMR of compound 1g

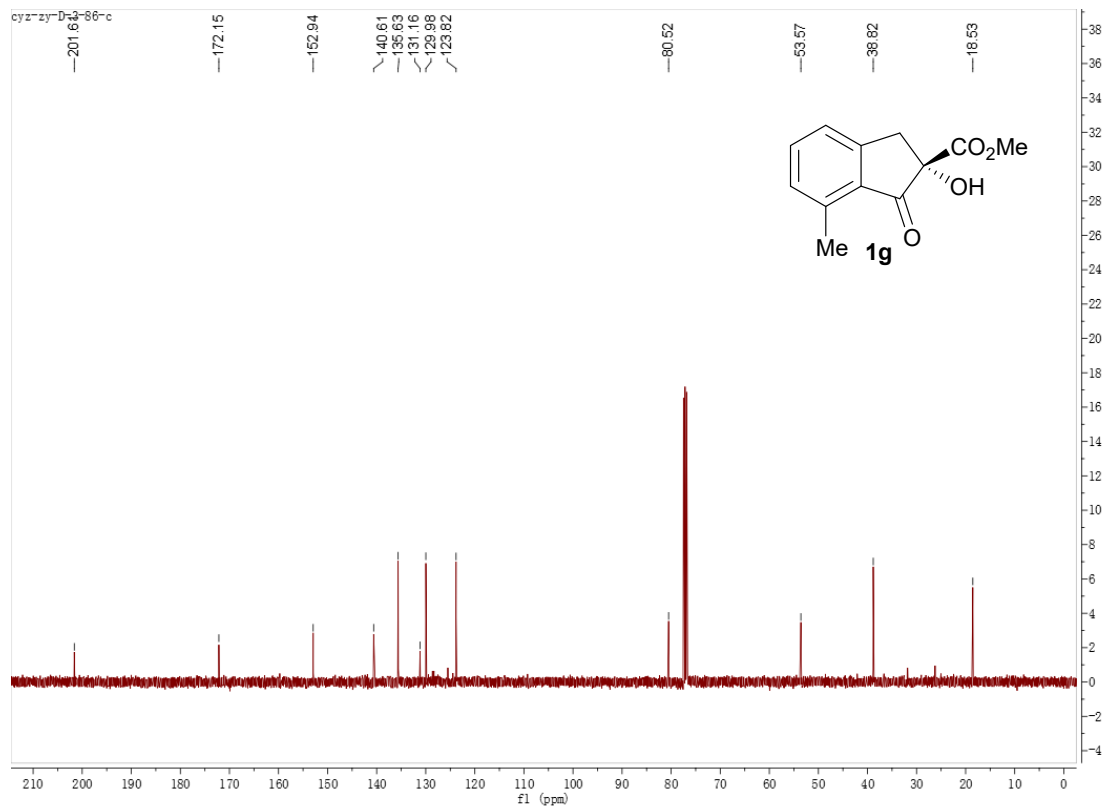

### <sup>1</sup>H NMR of compound 1h

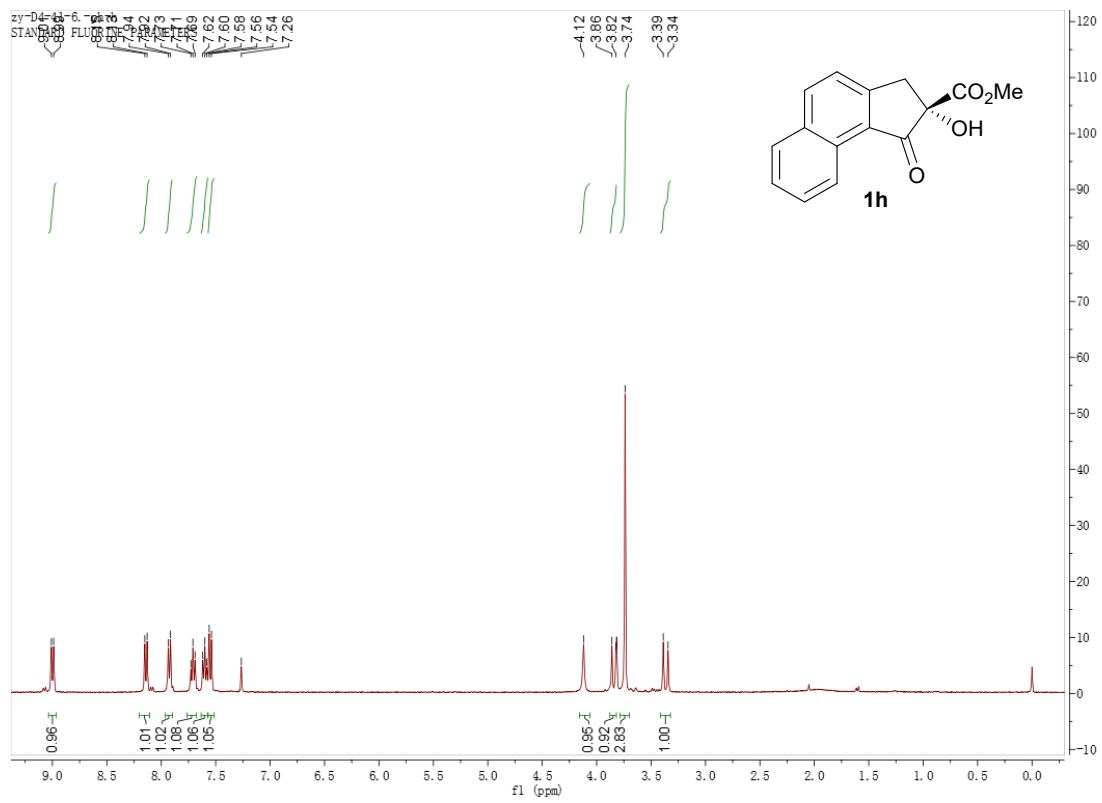

### <sup>13</sup>C NMR of compound 1h

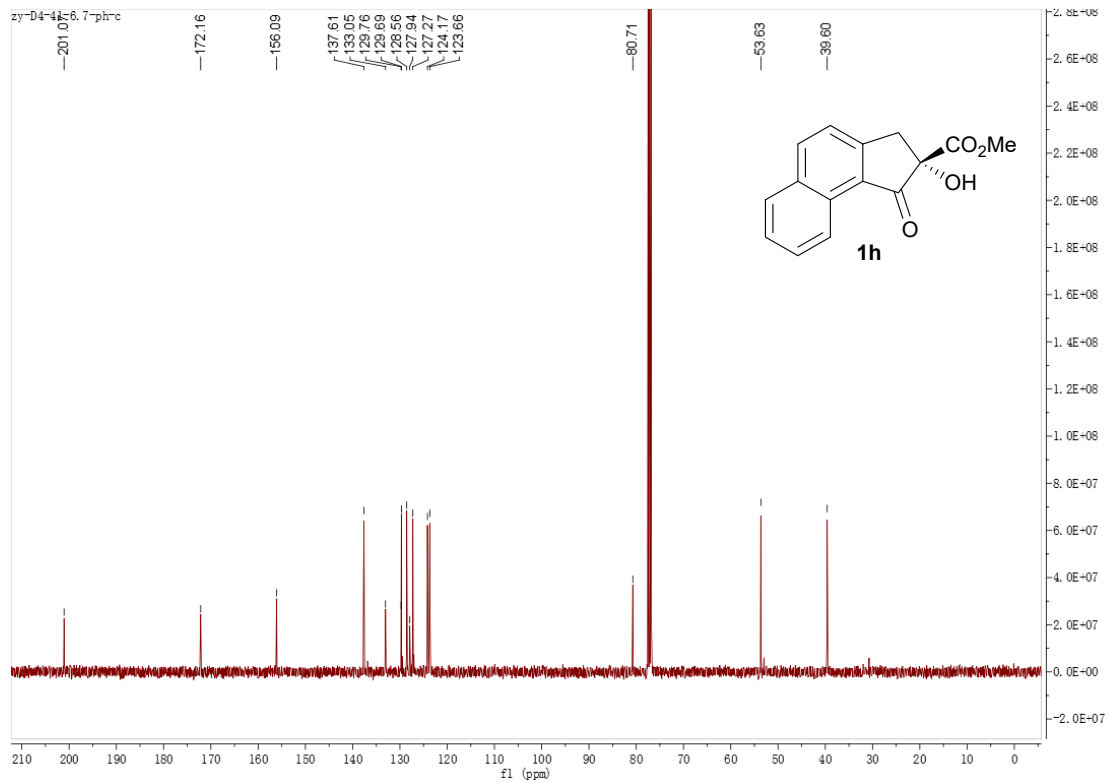

### <sup>1</sup>H NMR of compound 1i

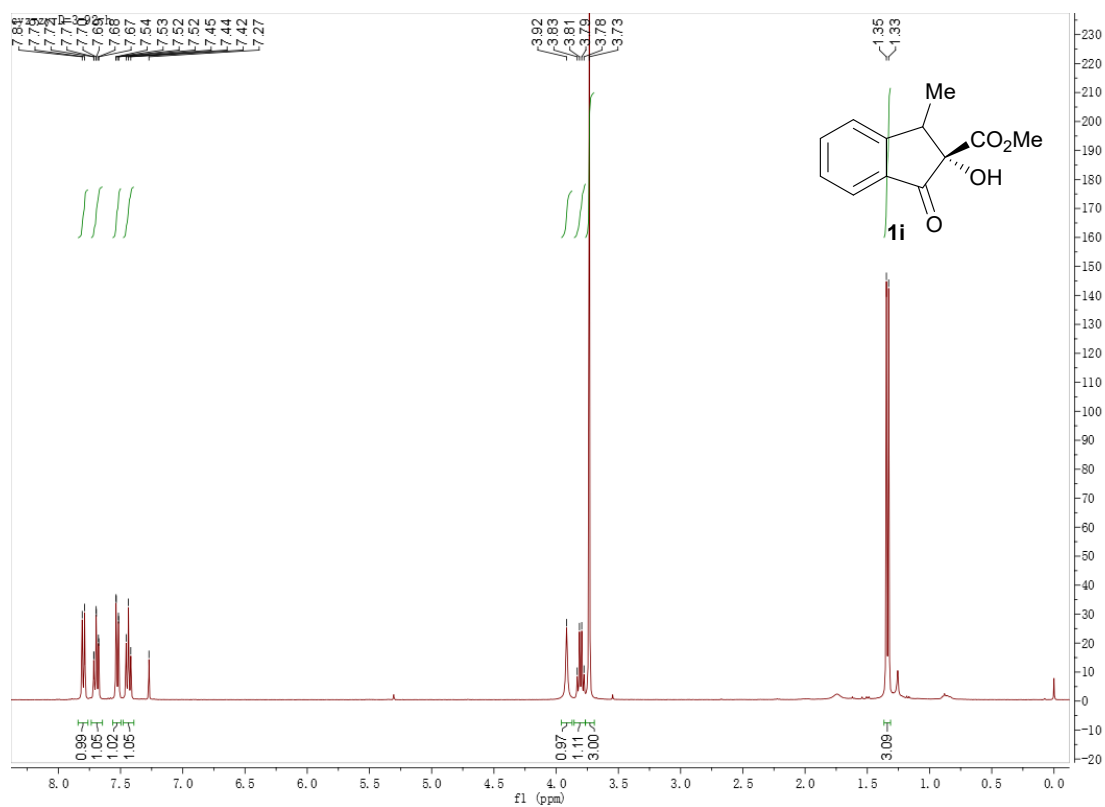

### <sup>13</sup>C NMR of compound 1i

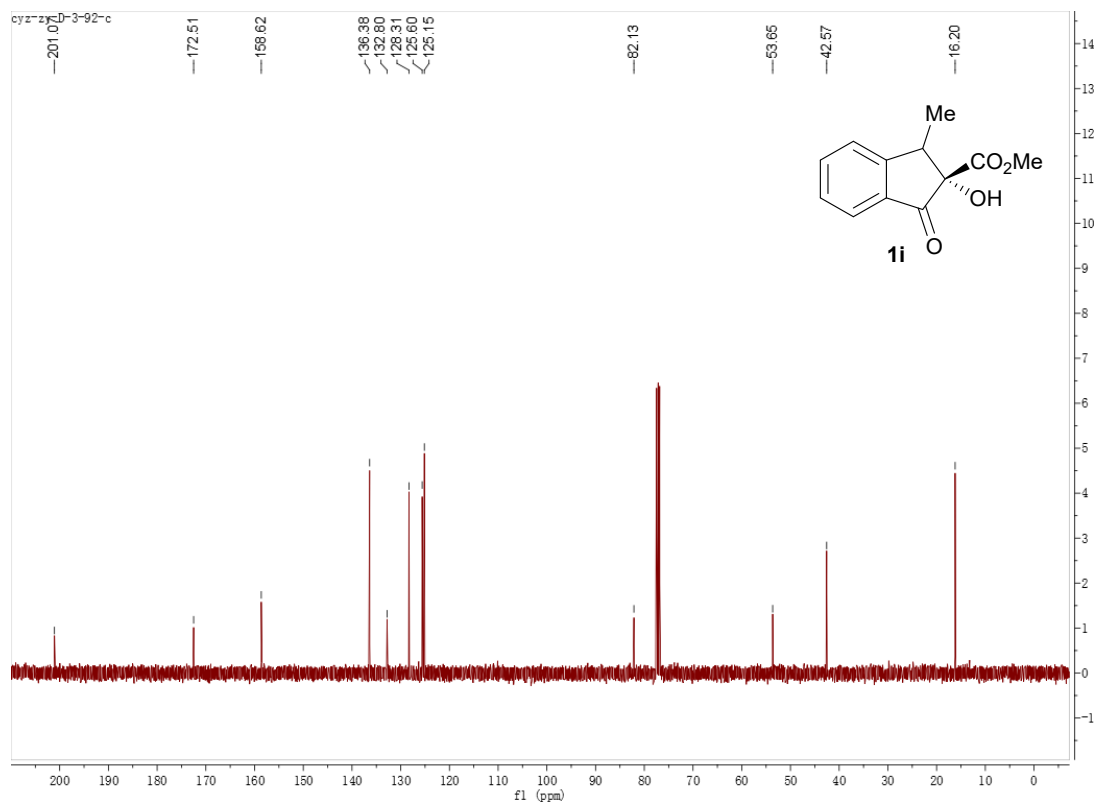

### <sup>1</sup>H NMR of compound 1j

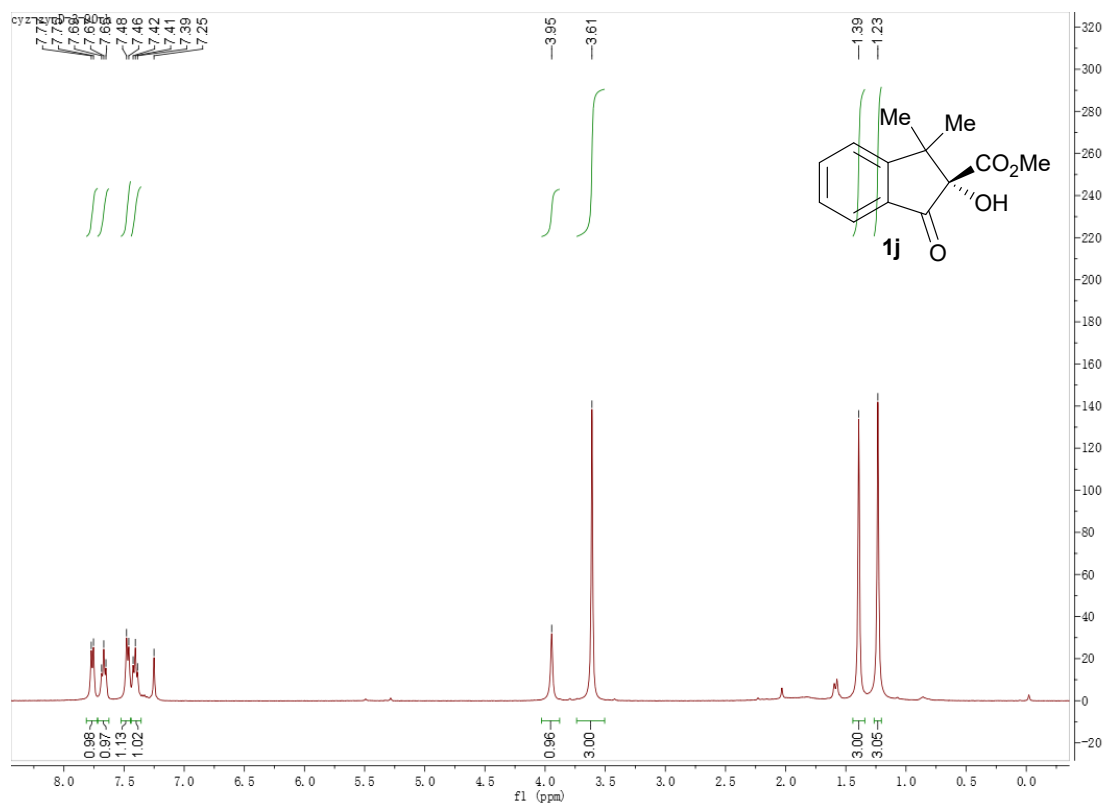

### <sup>13</sup>C NMR of compound 1j

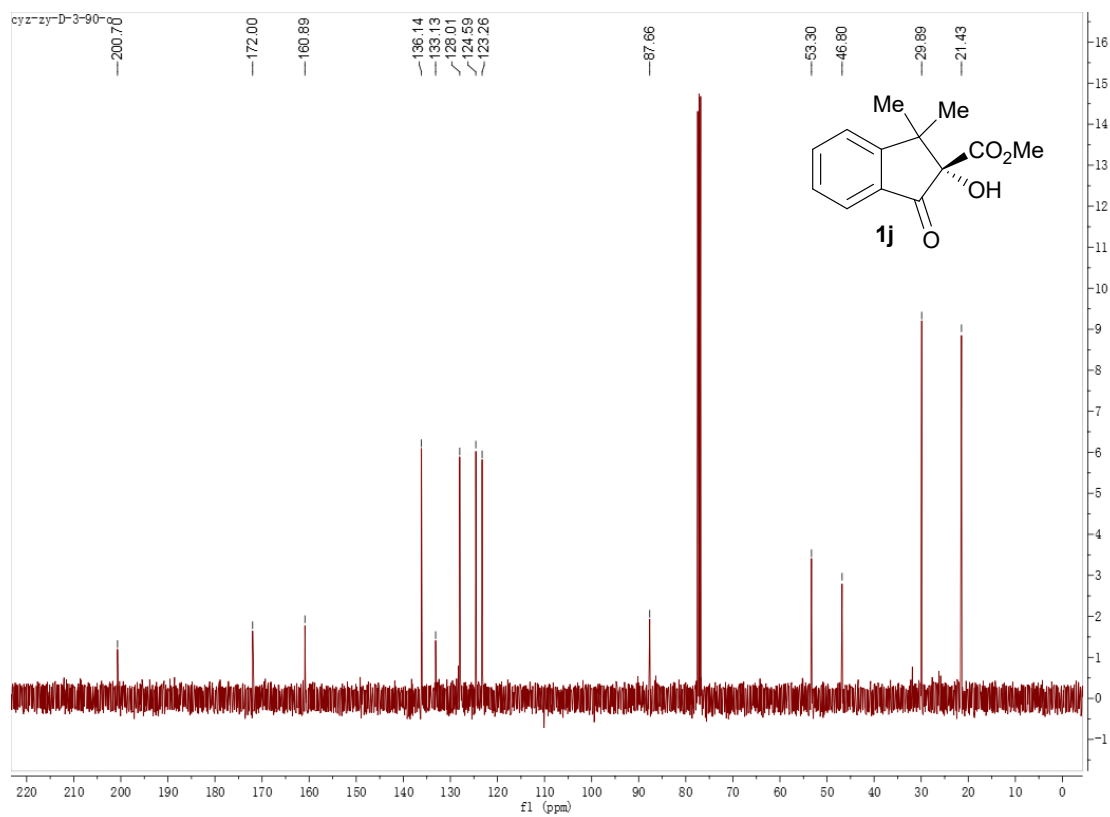

### <sup>1</sup>H NMR of compound 1k

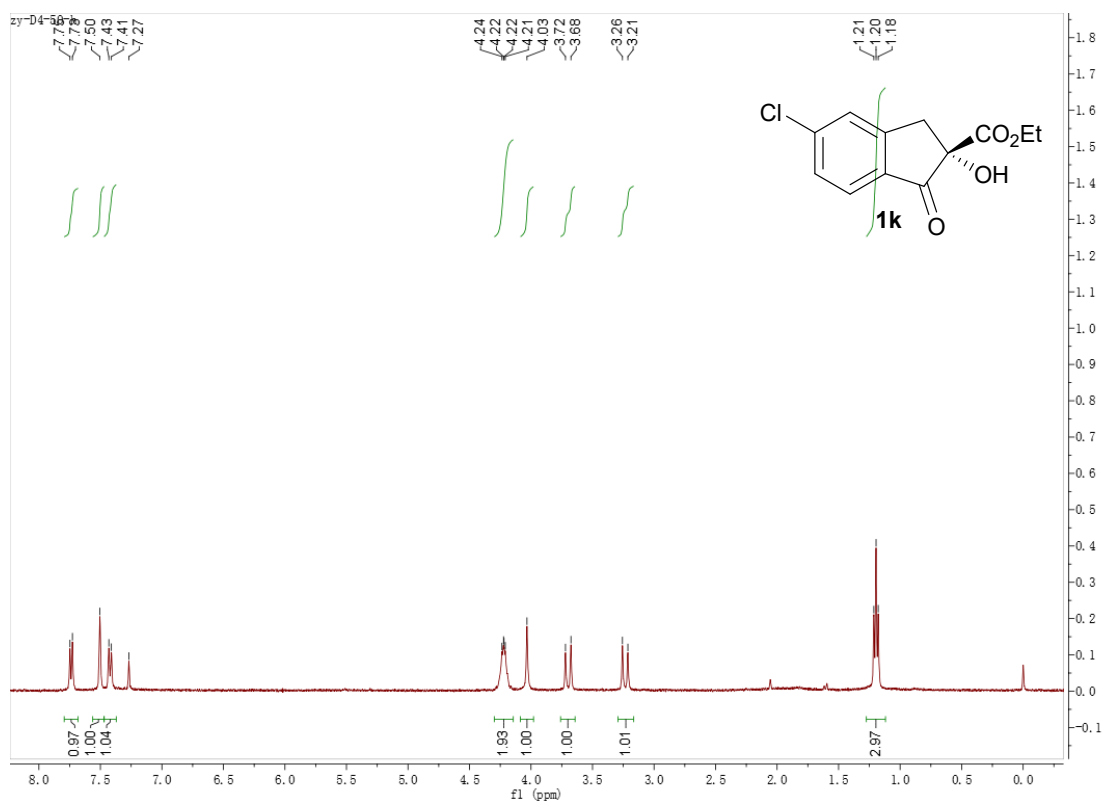

### <sup>13</sup>C NMR of compound 1k

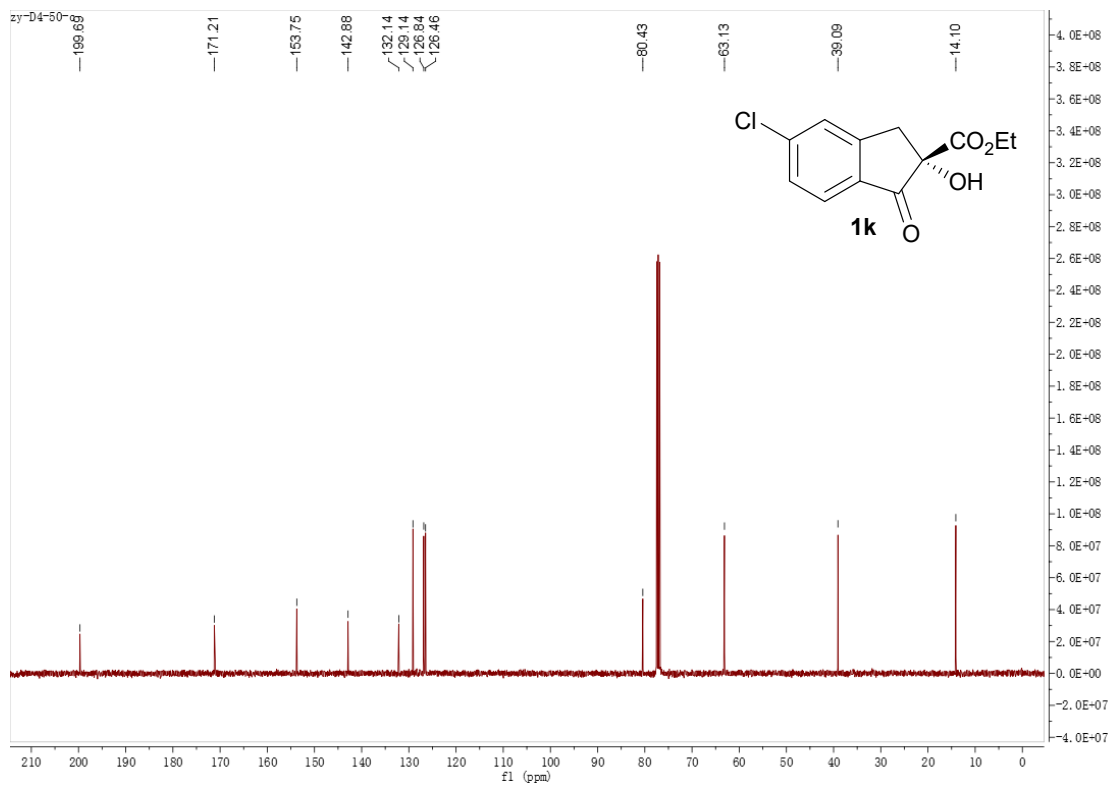

## 11. Copies of HPLC chromatogram

### 11.1 HPLC chromatogram of the Products

#### HPLC chromatogram of 1a

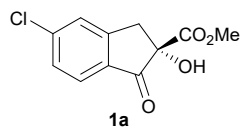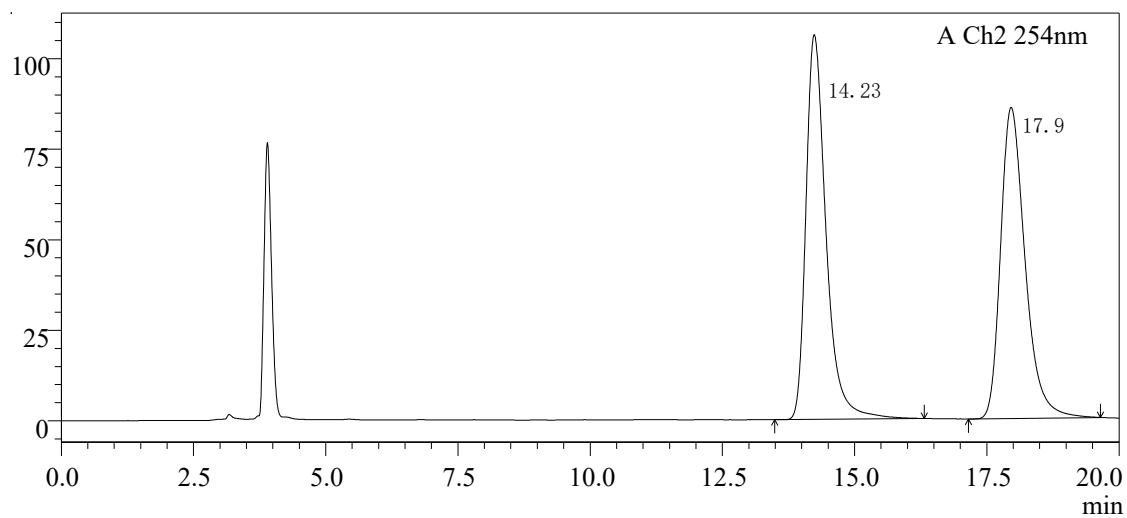

| ID# | Ret. Time | Area    | Height | Area % | Resolution |
|-----|-----------|---------|--------|--------|------------|
| 1   | 14.238    | 2800481 | 106246 | 50.367 | --         |
| 2   | 17.959    | 2759621 | 85968  | 49.633 | 5.010      |

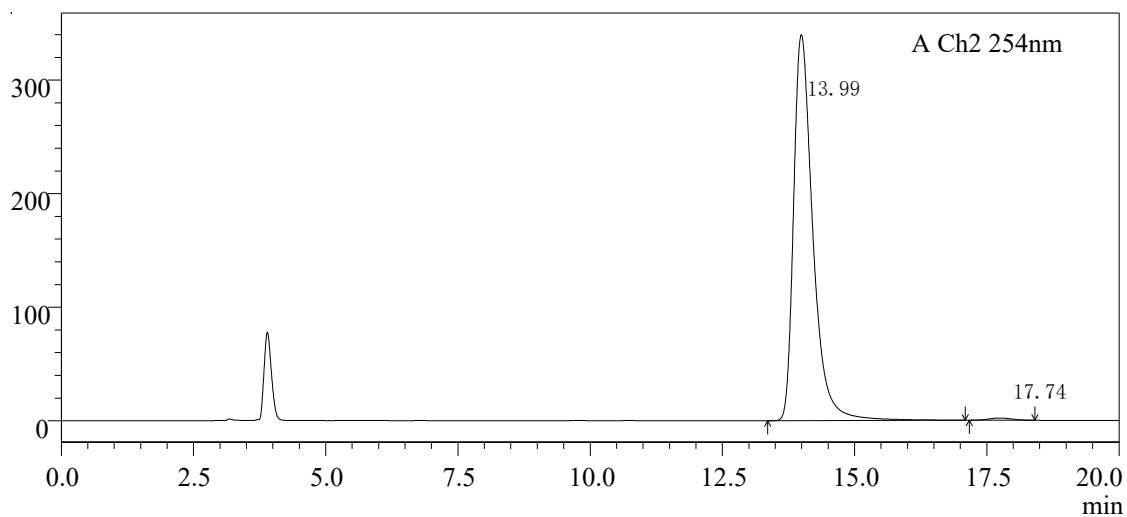

| ID# | Ret. Time | Area    | Height | Area % | Resolution |
|-----|-----------|---------|--------|--------|------------|
| 1   | 13.993    | 8635758 | 339860 | 99.321 | --         |
| 2   | 17.747    | 59069   | 1980   | 0.679  | 5.222      |

## HPLC chromatogram of 1b

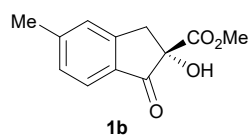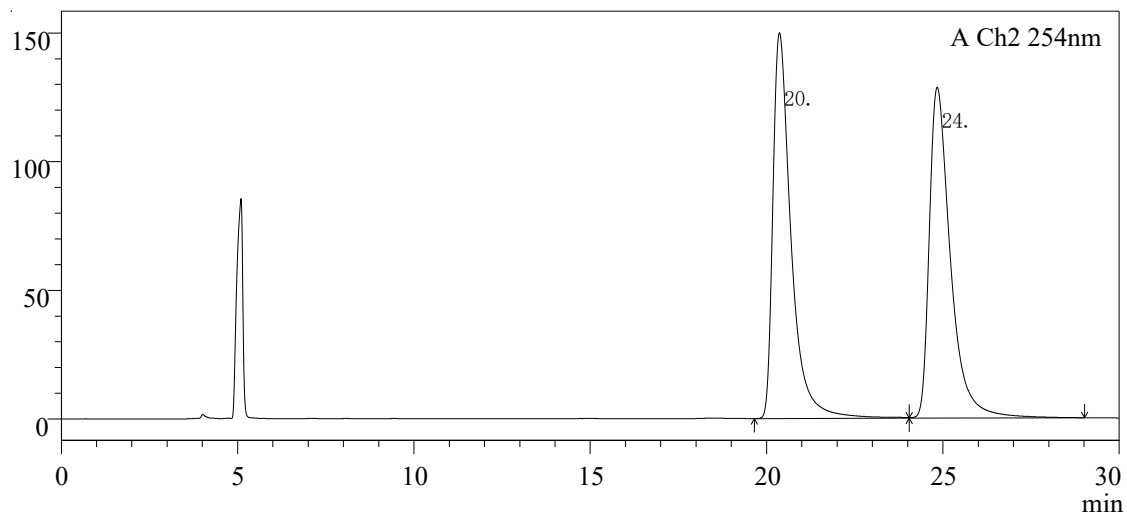

| ID# | Ret. Time | Area    | Height | Area % | Resolution |
|-----|-----------|---------|--------|--------|------------|
| 1   | 20.364    | 5405857 | 149908 | 50.064 | --         |
| 2   | 24.838    | 5392134 | 128585 | 49.936 | 4.669      |

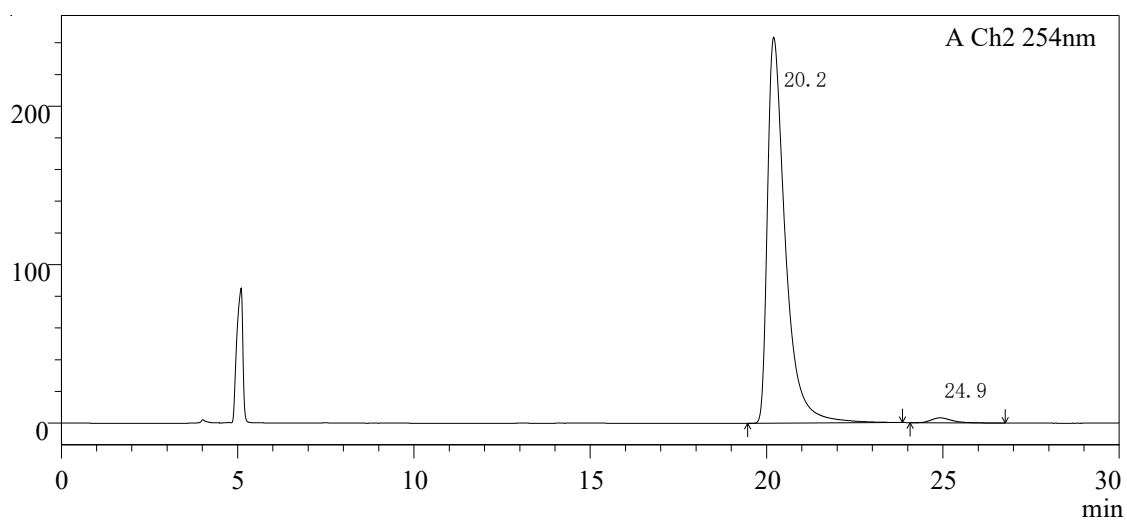

| ID# | Ret. Time | Area    | Height | Area % | Resolution |
|-----|-----------|---------|--------|--------|------------|
| 1   | 20.201    | 8633736 | 243759 | 98.554 | --         |
| 2   | 24.920    | 126653  | 3108   | 1.446  | 4.852      |

## HPLC chromatogram of 1c

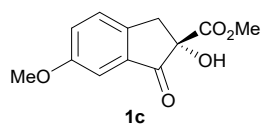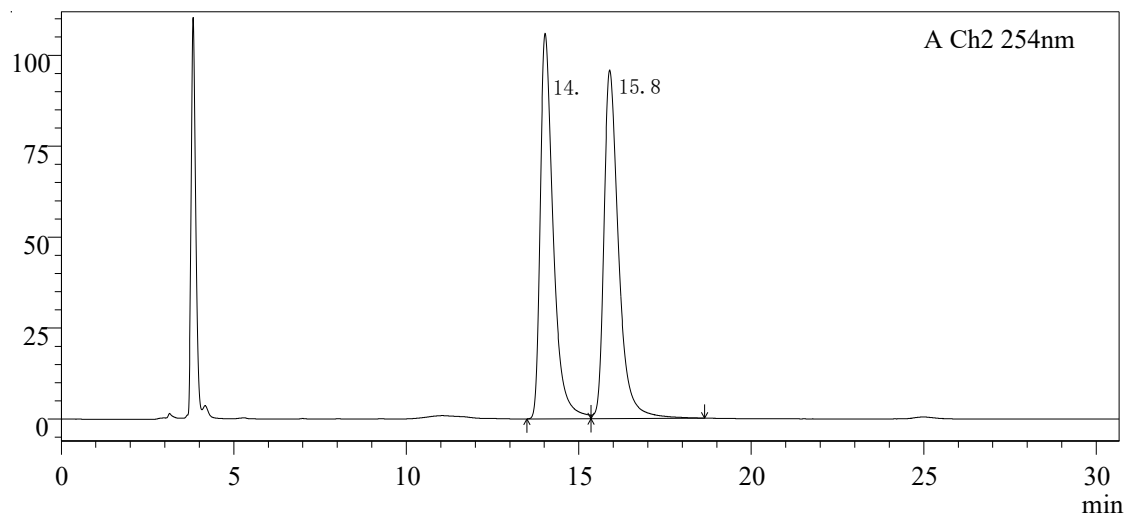

| ID# | Ret. Time | Area    | Height | Area % | Resolution |
|-----|-----------|---------|--------|--------|------------|
| 1   | 14.026    | 2771384 | 105971 | 49.488 | --         |
| 2   | 15.898    | 2828716 | 95792  | 50.512 | 2.691      |

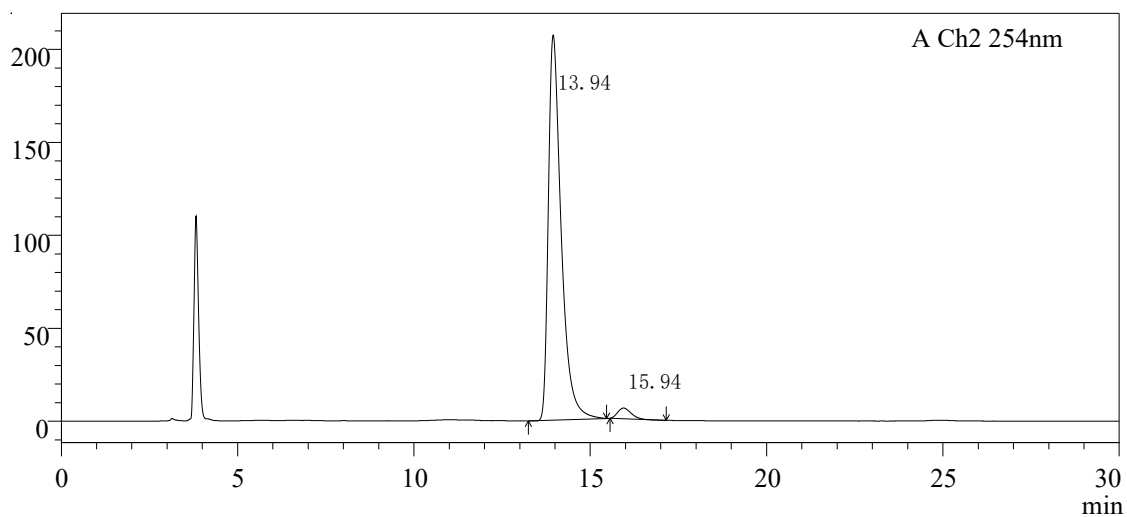

| ID# | Ret. Time | Area    | Height | Area % | Resolution |
|-----|-----------|---------|--------|--------|------------|
| 1   | 13.948    | 5264852 | 207216 | 97.216 | --         |
| 2   | 15.944    | 150797  | 5746   | 2.784  | 2.945      |



## HPLC chromatogram of 1d

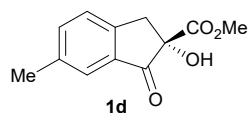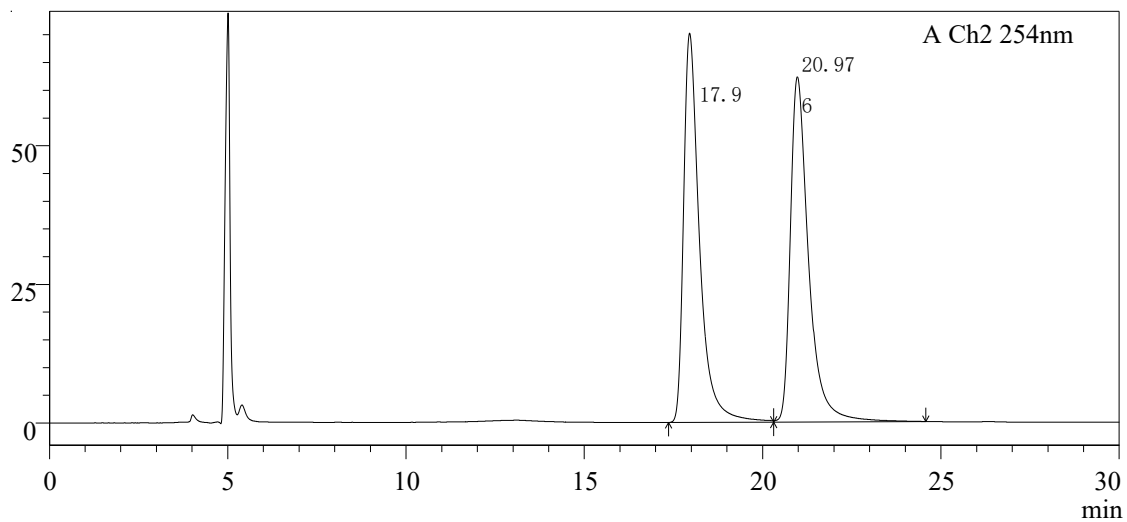

| ID# | Ret. Time | Area    | Height | Area % | Resolution |
|-----|-----------|---------|--------|--------|------------|
| 1   | 17.950    | 2194267 | 70188  | 49.776 | --         |
| 2   | 20.976    | 2214056 | 62258  | 50.224 | 3.694      |

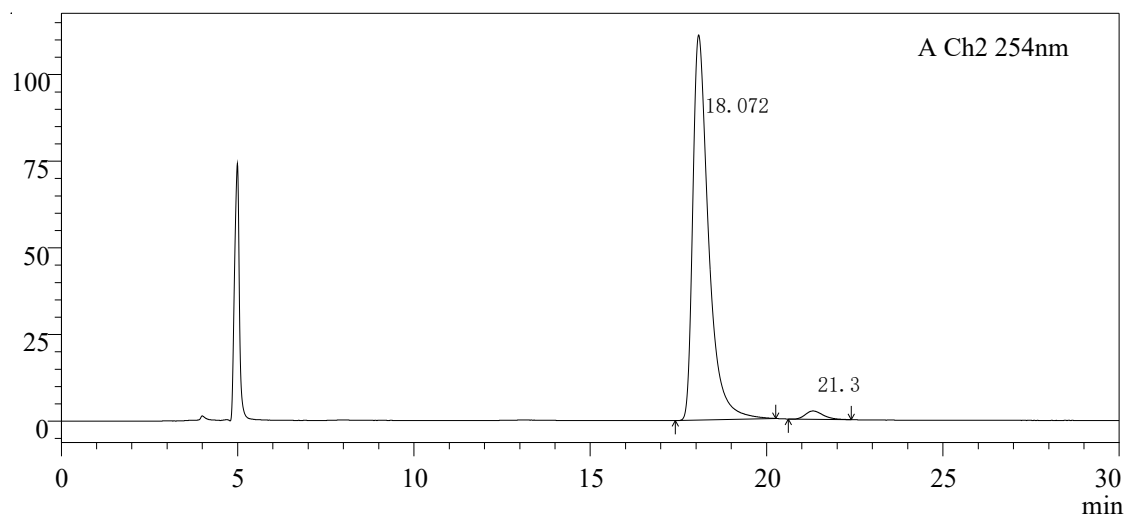

| ID# | Ret. Time | Area    | Height | Area % | Resolution |
|-----|-----------|---------|--------|--------|------------|
| 1   | 18.072    | 3470787 | 111158 | 97.652 | --         |
| 2   | 21.321    | 83465   | 2399   | 2.348  | 3.872      |

## HPLC chromatogram of 1e

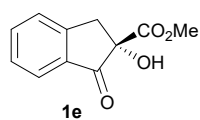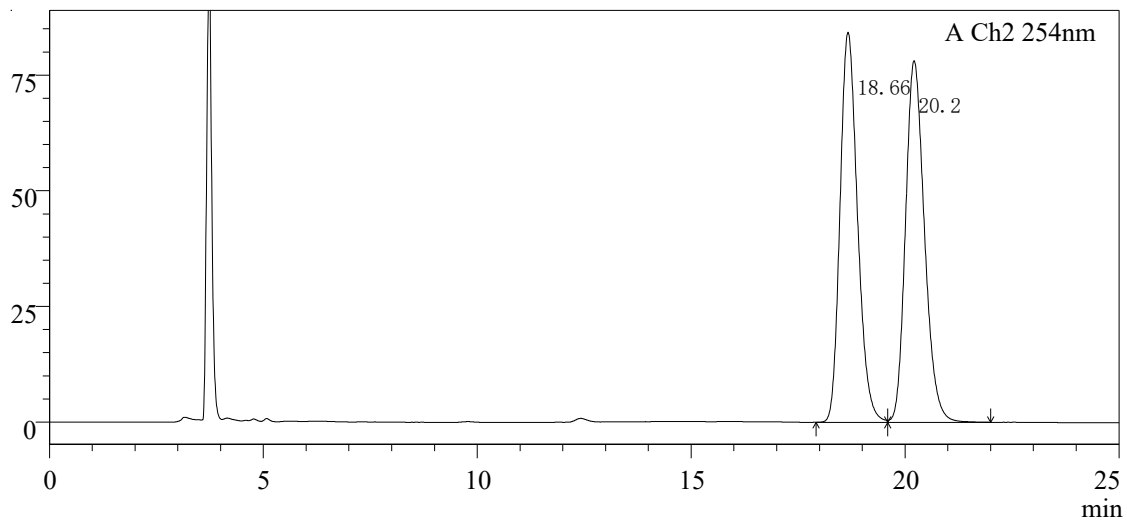

| ID# | Ret. Time | Area    | Height | Area % | Resolution |
|-----|-----------|---------|--------|--------|------------|
| 1   | 18.666    | 2395628 | 84315  | 49.865 | --         |
| 2   | 20.212    | 2408642 | 78160  | 50.135 | 1.999      |

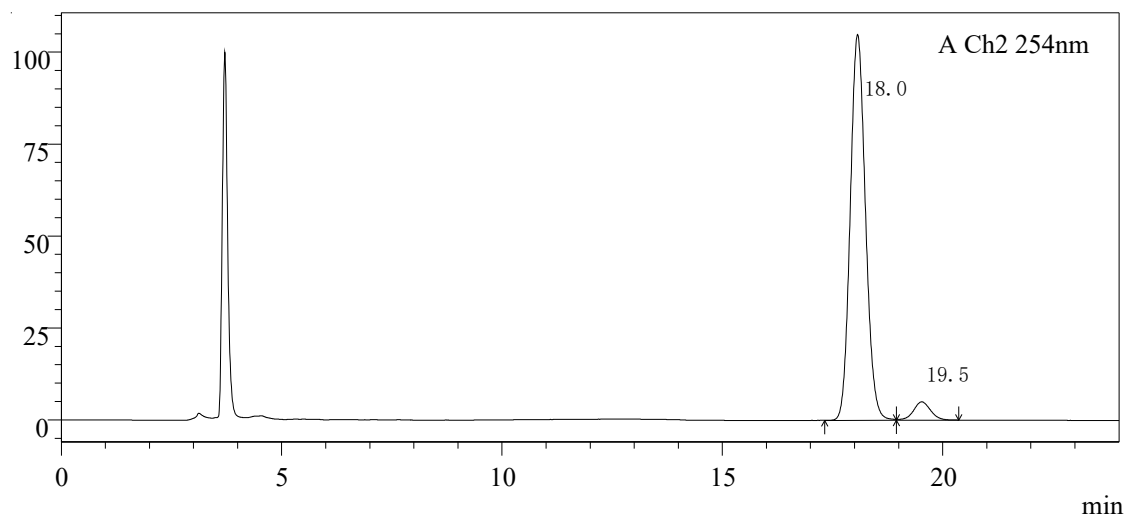

| ID# | Ret. Time | Area    | Height | Area % | Resolution |
|-----|-----------|---------|--------|--------|------------|
| 1   | 18.068    | 2522781 | 104962 | 94.879 | --         |
| 2   | 19.526    | 136152  | 4992   | 5.121  | 2.179      |

## HPLC chromatogram of 1f

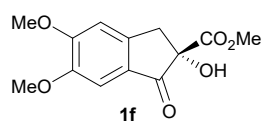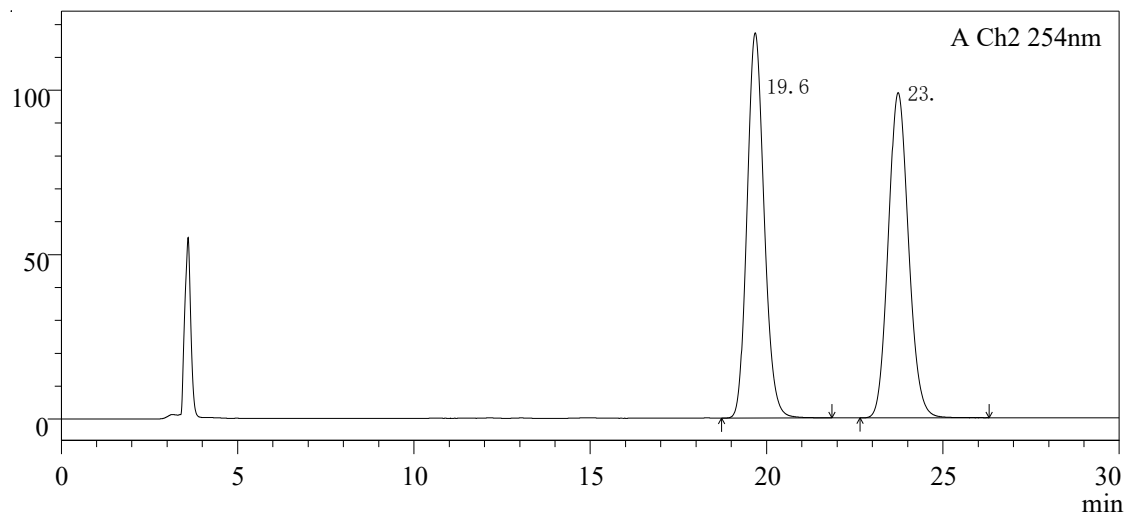

| ID# | Ret. Time | Area    | Height | Area % | Resolution |
|-----|-----------|---------|--------|--------|------------|
| 1   | 19.674    | 3943280 | 117186 | 50.033 | --         |
| 2   | 23.727    | 3938122 | 98908  | 49.967 | 4.202      |

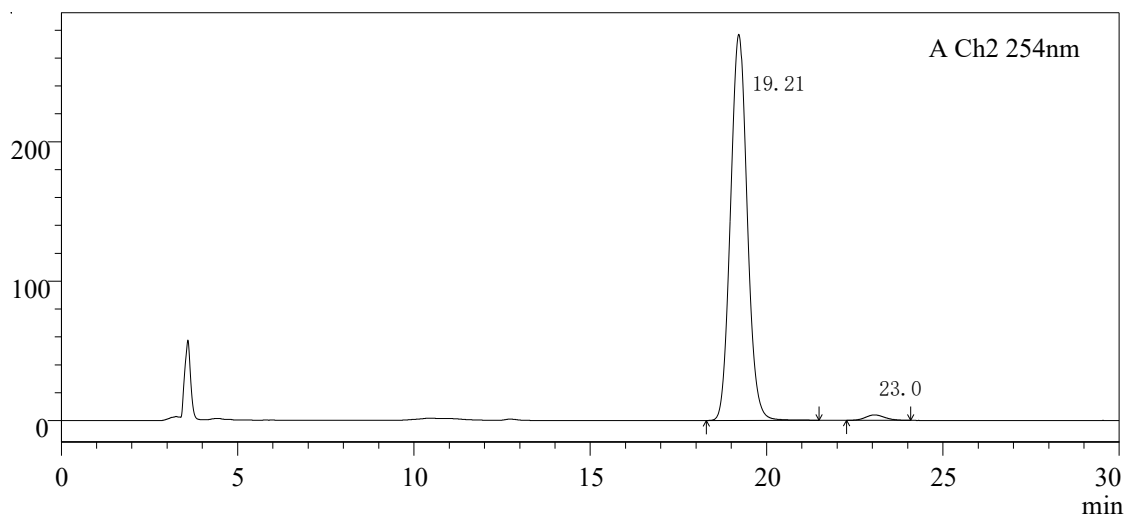

| ID# | Ret. Time | Area    | Height | Area % | Resolution |
|-----|-----------|---------|--------|--------|------------|
| 1   | 19.215    | 9030907 | 276886 | 98.389 | --         |
| 2   | 23.061    | 147825  | 3880   | 1.611  | 4.128      |

## HPLC chromatogram of 1g

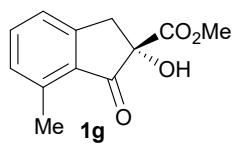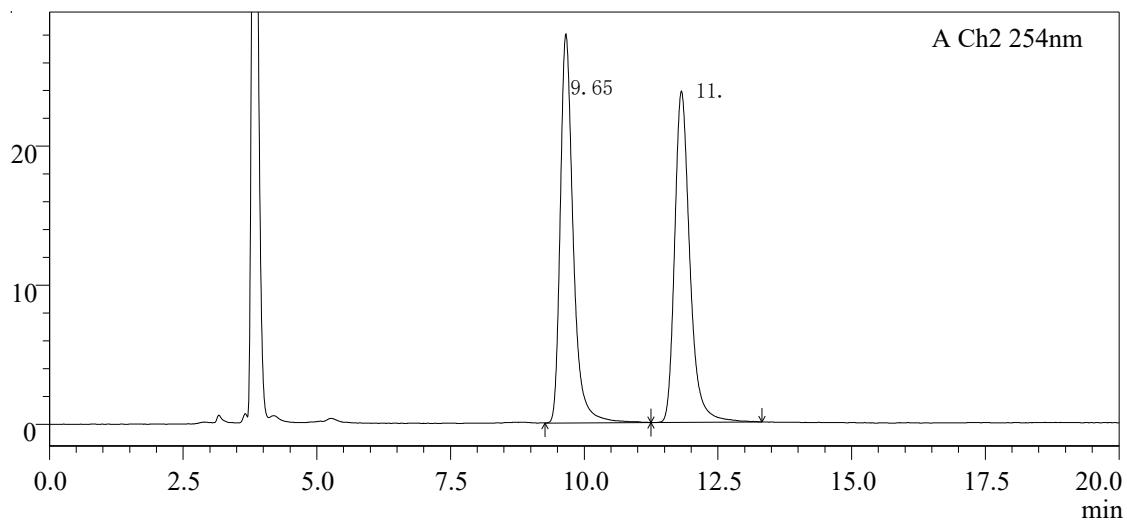

| ID# | Ret. Time | Area   | Height | Area % | Resolution |
|-----|-----------|--------|--------|--------|------------|
| 1   | 9.656     | 471840 | 27986  | 49.967 | --         |
| 2   | 11.817    | 472456 | 23838  | 50.033 | 4.660      |

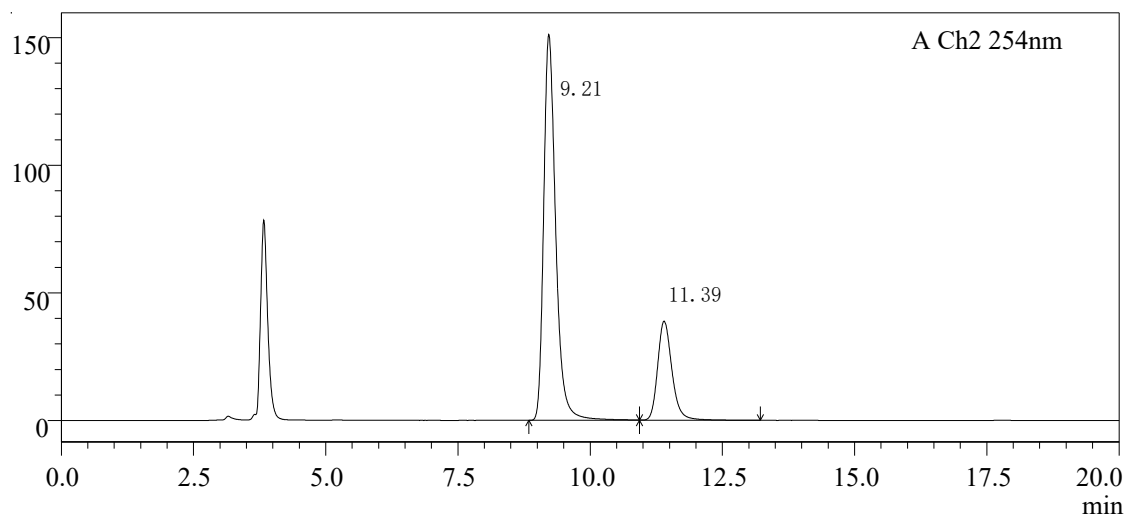

| ID# | Ret. Time | Area    | Height | Area % | Resolution |
|-----|-----------|---------|--------|--------|------------|
| 1   | 9.219     | 2383650 | 151142 | 76.506 | --         |
| 2   | 11.398    | 731981  | 38859  | 23.494 | 4.933      |

## HPLC chromatogram of 1h

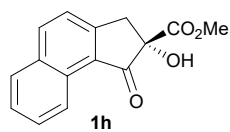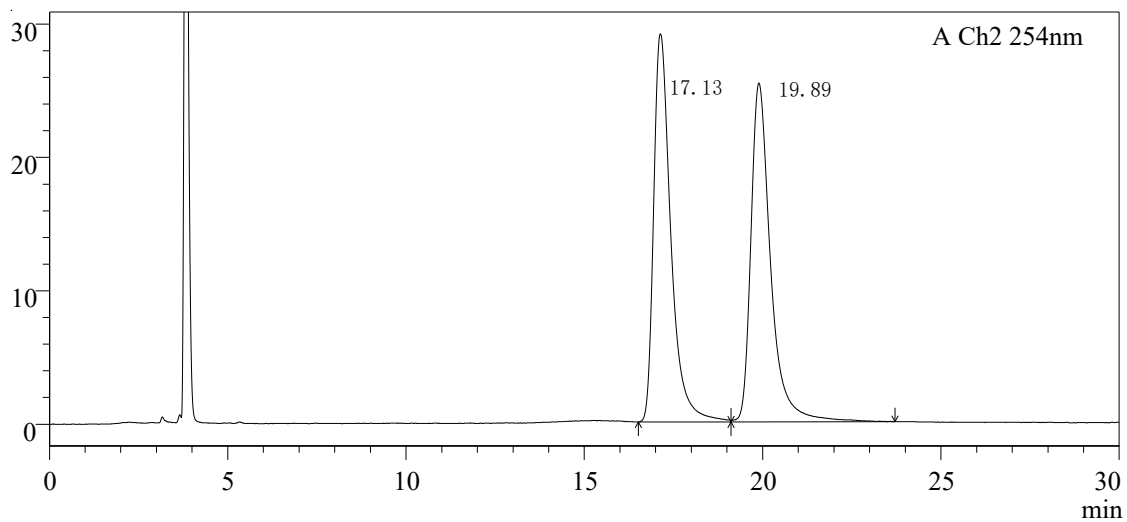

| ID# | Ret. Time | Area   | Height | Area % | Resolution |
|-----|-----------|--------|--------|--------|------------|
| 1   | 17.134    | 965728 | 29101  | 49.651 | --         |
| 2   | 19.893    | 979312 | 25395  | 50.349 | 3.131      |

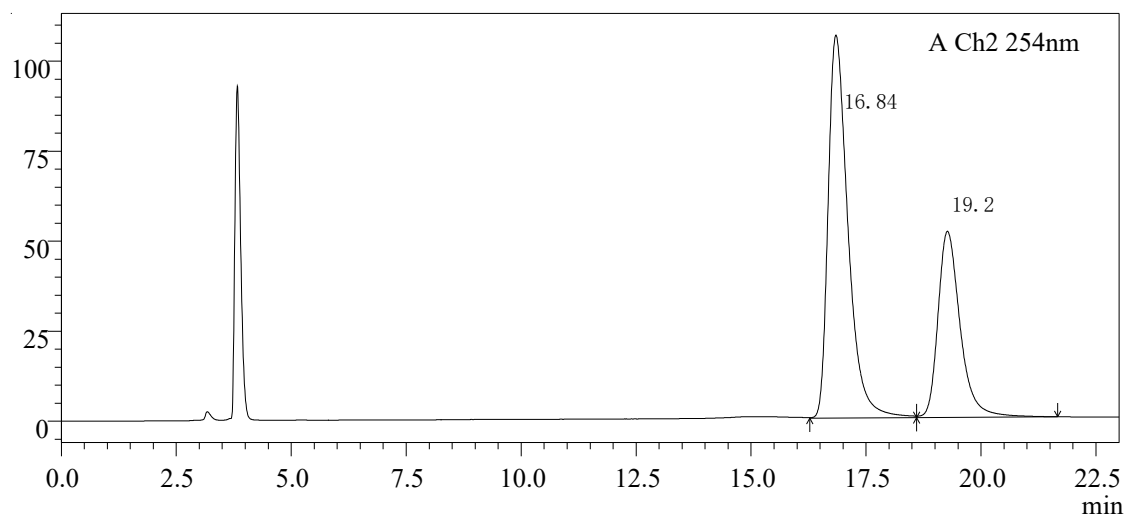

| ID# | Ret. Time | Area    | Height | Area % | Resolution |
|-----|-----------|---------|--------|--------|------------|
| 1   | 16.845    | 3197817 | 106386 | 64.839 | --         |
| 2   | 19.270    | 1734149 | 51706  | 35.161 | 3.016      |

## HPLC chromatogram of 1i

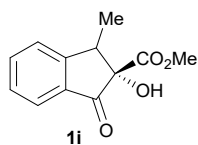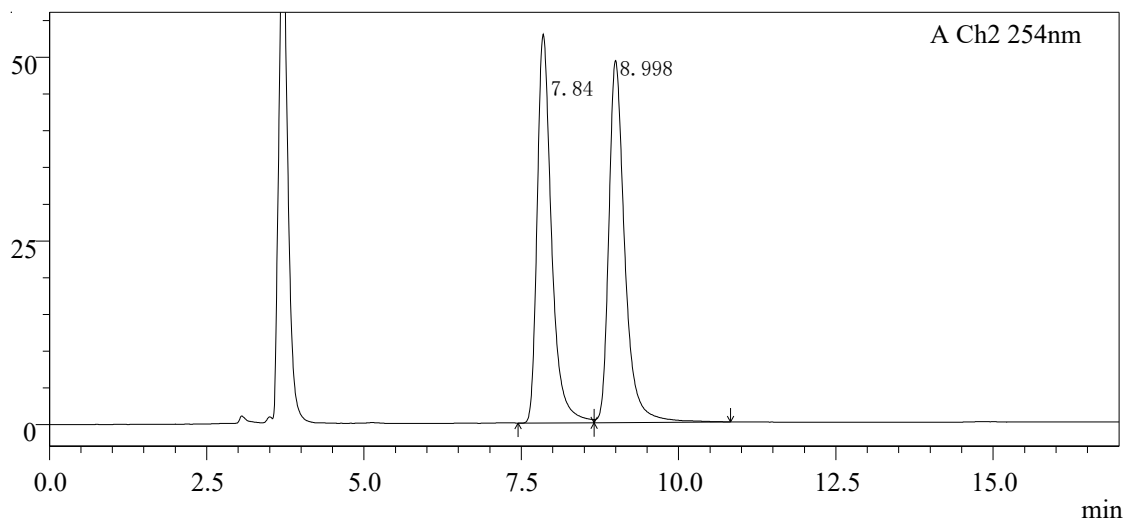

| ID# | Ret. Time | Area   | Height | Area % | Resolution |
|-----|-----------|--------|--------|--------|------------|
| 1   | 7.848     | 840912 | 52921  | 49.182 | --         |
| 2   | 8.998     | 868874 | 49266  | 50.818 | 2.733      |

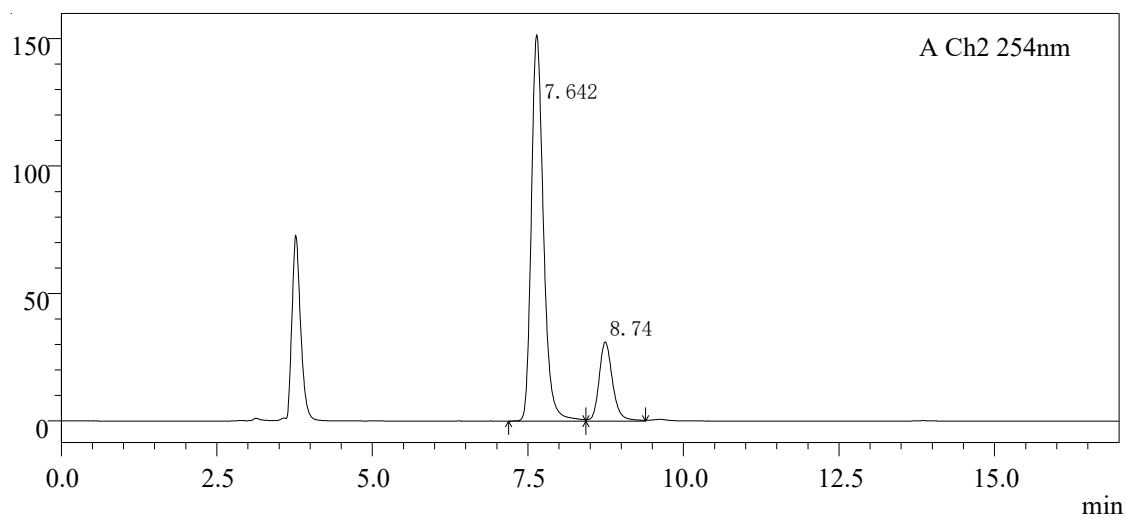

| ID# | Ret. Time | Area    | Height | Area % | Resolution |
|-----|-----------|---------|--------|--------|------------|
| 1   | 7.642     | 2052377 | 151496 | 81.487 | --         |
| 2   | 8.743     | 466283  | 31046  | 18.513 | 2.988      |

## HPLC chromatogram of 1j

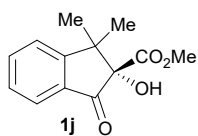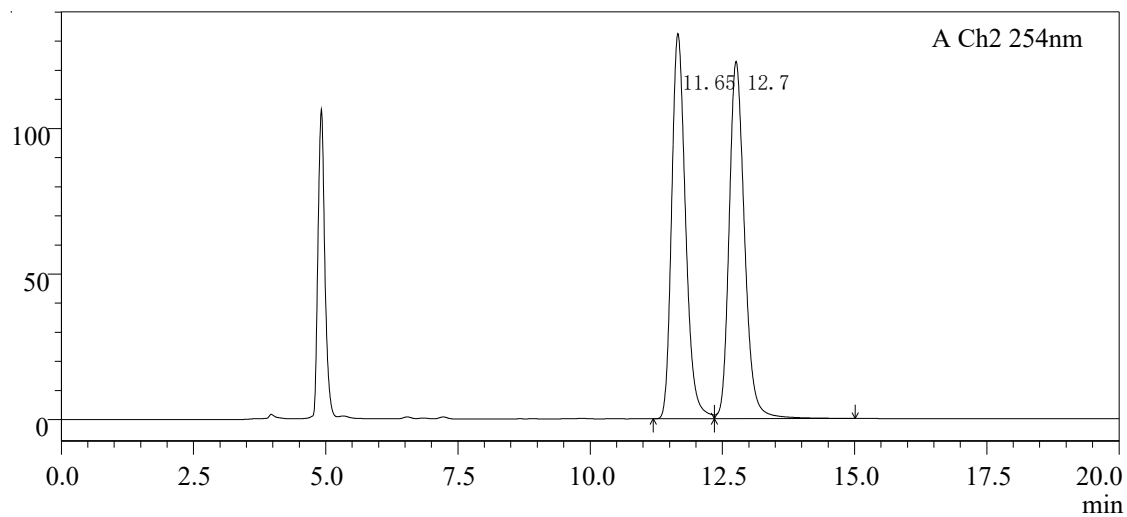

| ID# | Ret. Time | Area    | Height | Area % | Resolution |
|-----|-----------|---------|--------|--------|------------|
| 1   | 11.658    | 2435065 | 132387 | 49.519 | --         |
| 2   | 12.759    | 2482350 | 122777 | 50.481 | 2.206      |

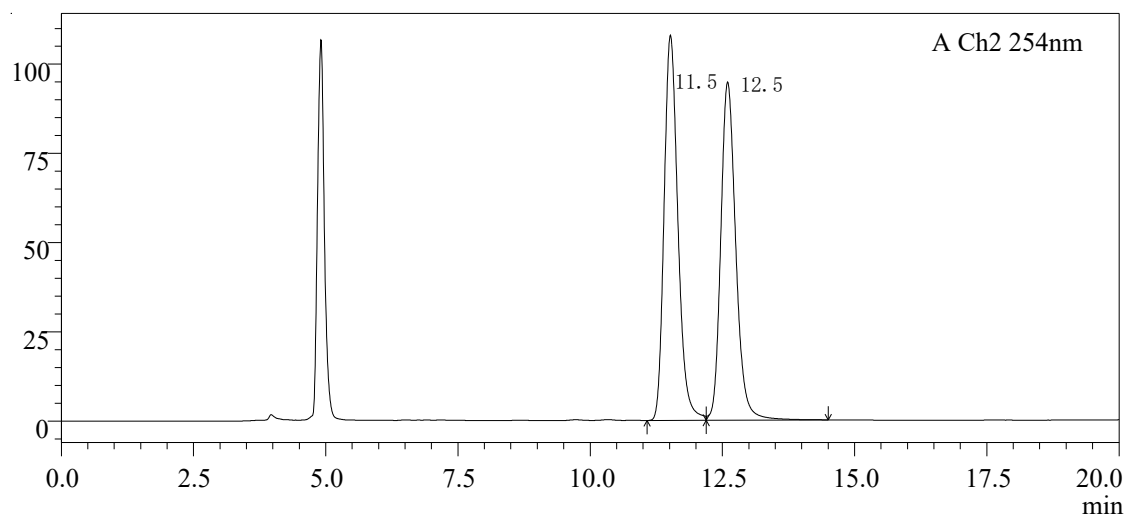

| ID# | Ret. Time | Area    | Height | Area % | Resolution |
|-----|-----------|---------|--------|--------|------------|
| 1   | 11.516    | 1954801 | 107965 | 50.970 | --         |
| 2   | 12.599    | 1880401 | 94763  | 49.030 | 2.207      |

## HPLC chromatogram of 1k

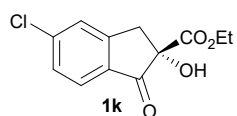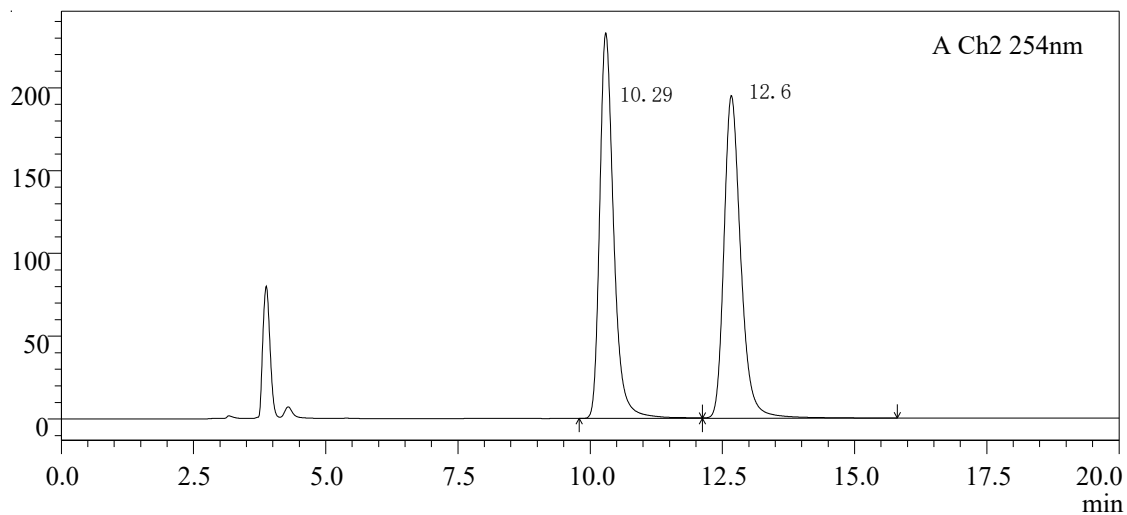

| ID# | Ret. Time | Area    | Height | Area % | Resolution |
|-----|-----------|---------|--------|--------|------------|
| 1   | 10.294    | 4292526 | 232864 | 49.857 | --         |
| 2   | 12.670    | 4317075 | 194856 | 50.143 | 4.608      |

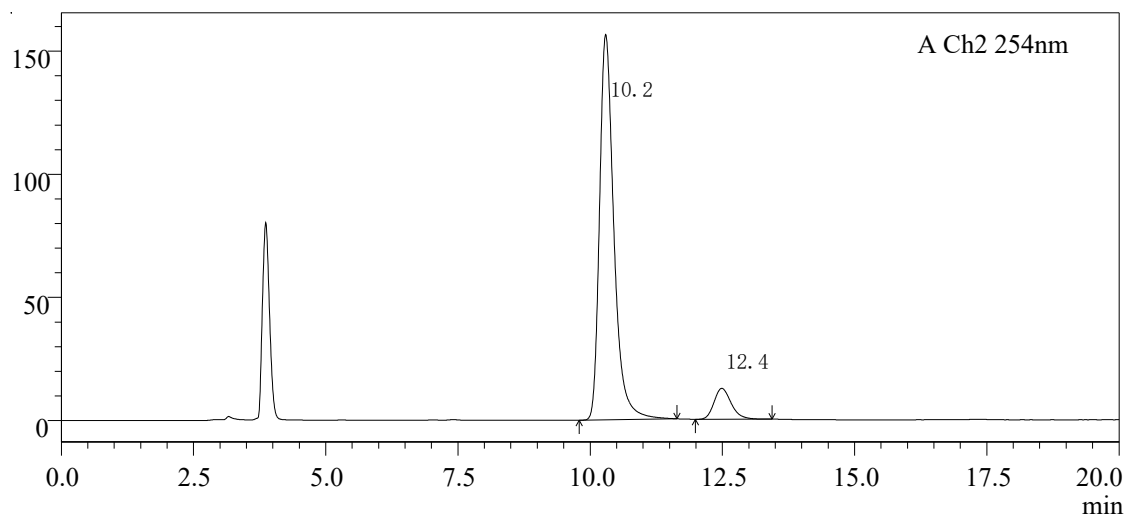

| ID# | Ret. Time | Area    | Height | Area % | Resolution |
|-----|-----------|---------|--------|--------|------------|
| 1   | 10.293    | 2965045 | 156536 | 91.258 | --         |
| 2   | 12.490    | 284018  | 12559  | 8.742  | 4.106      |



## 11.2 HPLC chromatogram of the recyclability of the catalytic system

racemate

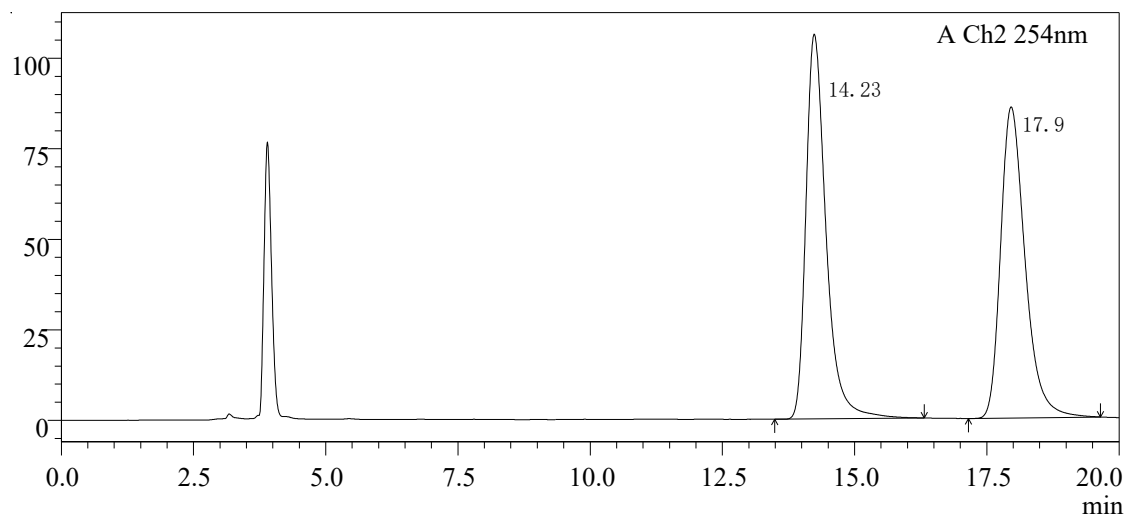

| ID# | Ret. Time | Area    | Height | Area % | Resolution |
|-----|-----------|---------|--------|--------|------------|
| 1   | 14.238    | 2800481 | 106246 | 50.367 | --         |
| 2   | 17.959    | 2759621 | 85968  | 49.633 | 5.010      |

First cycle

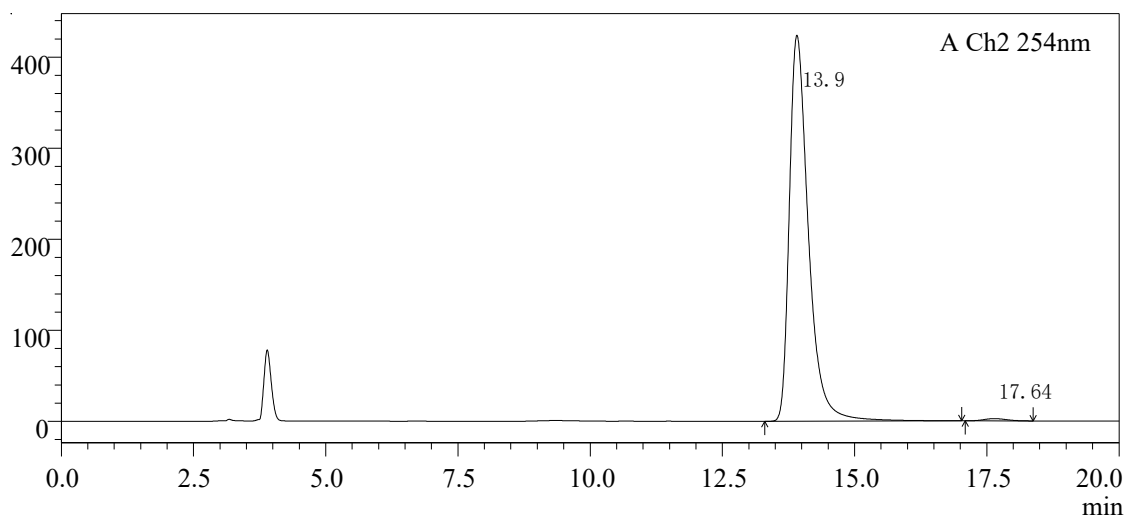

| ID# | Ret. Time | Area     | Height | Area % | Resolution |
|-----|-----------|----------|--------|--------|------------|
| 1   | 13.909    | 10672976 | 423955 | 99.300 | --         |
| 2   | 17.646    | 75200    | 2527   | 0.700  | 5.240      |

### Second cycle

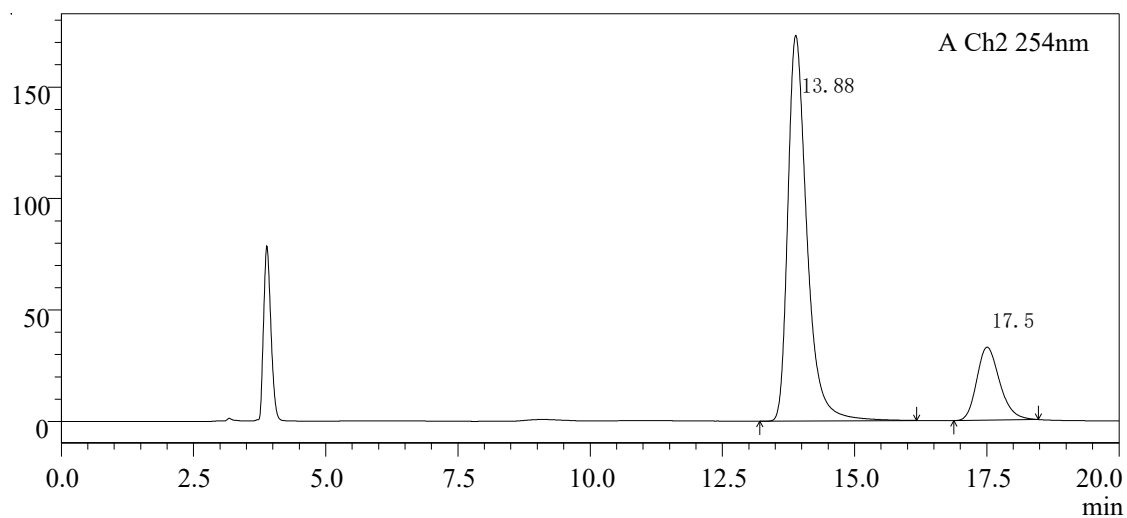

| ID# | Ret. Time | Area    | Height | Area % | Resolution |
|-----|-----------|---------|--------|--------|------------|
| 1   | 13.887    | 4352306 | 173029 | 81.433 | --         |
| 2   | 17.505    | 992315  | 32783  | 18.567 | 5.085      |

### Third cycle

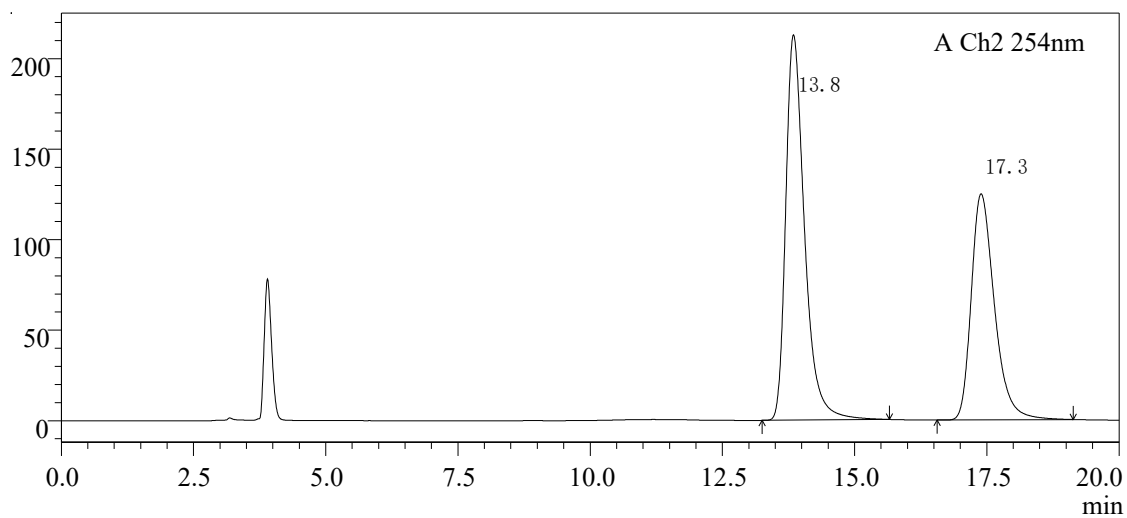

| ID# | Ret. Time | Area    | Height | Area % | Resolution |
|-----|-----------|---------|--------|--------|------------|
| 1   | 13.844    | 5279032 | 212910 | 58.058 | --         |
| 2   | 17.392    | 3813669 | 124911 | 41.942 | 5.028      |

### 11.3 HPLC chromatogram of gram-scale experiment

racemate

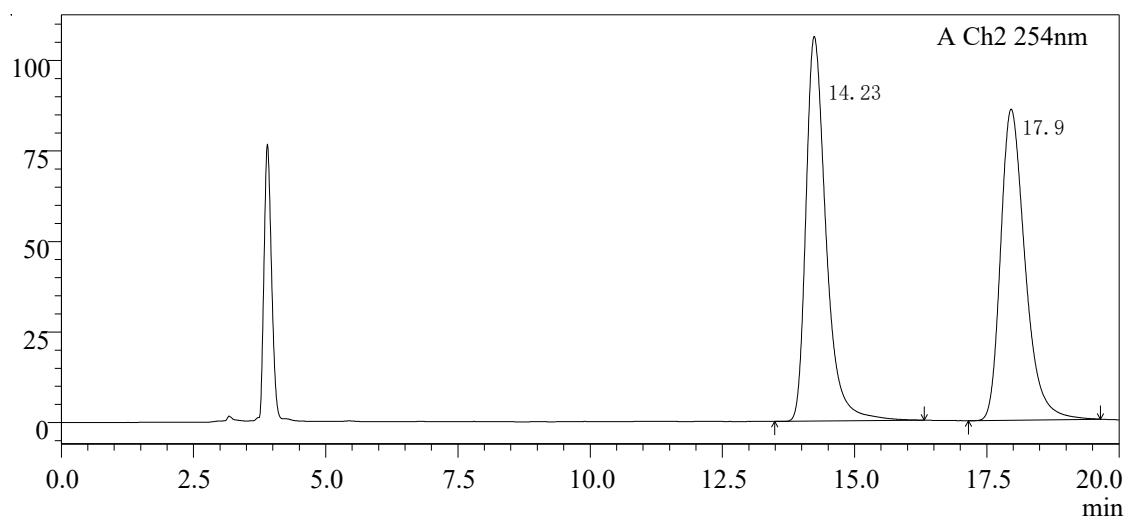

| ID# | Ret. Time | Area    | Height | Area % | Resolution |
|-----|-----------|---------|--------|--------|------------|
| 1   | 14.238    | 2800481 | 106246 | 50.367 | --         |
| 2   | 17.959    | 2759621 | 85968  | 49.633 | 5.010      |

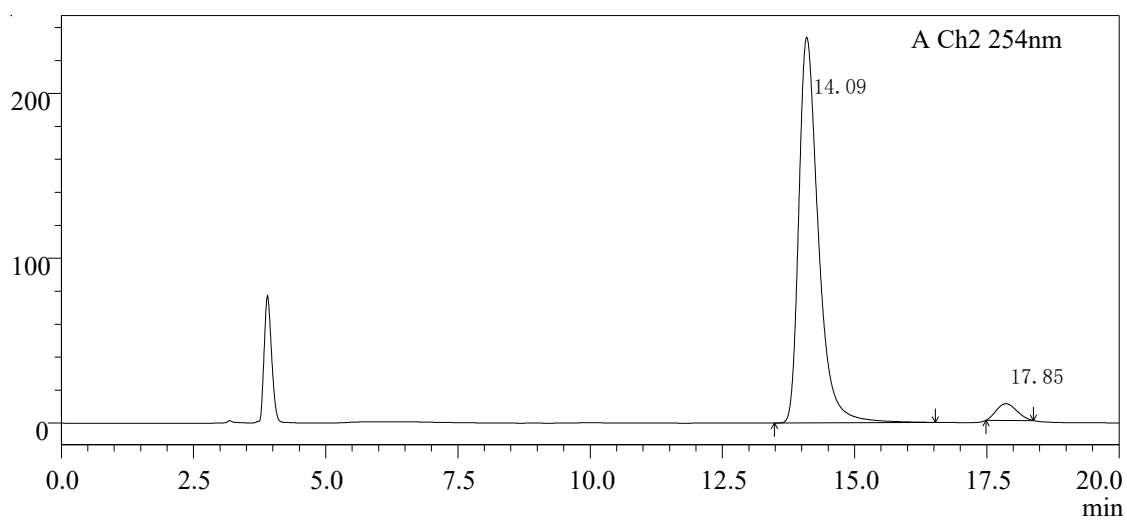

| ID# | Ret. Time | Area    | Height | Area % | Resolution |
|-----|-----------|---------|--------|--------|------------|
| 1   | 14.096    | 6012567 | 234063 | 95.657 | --         |
| 2   | 17.859    | 272968  | 10143  | 4.343  | 5.413      |
